# Supplementary material for: Antioxidation of 2-phenylbenzofuran derivatives: structural-electronic effects and mechanisms
Source: Royal Society of Chemistry journal article supplement (doi:10.1039/c9ra10835a), 2020-01-01
Supplement: c9ra10835a1.pdf [file c9ra10835a1.pdf]

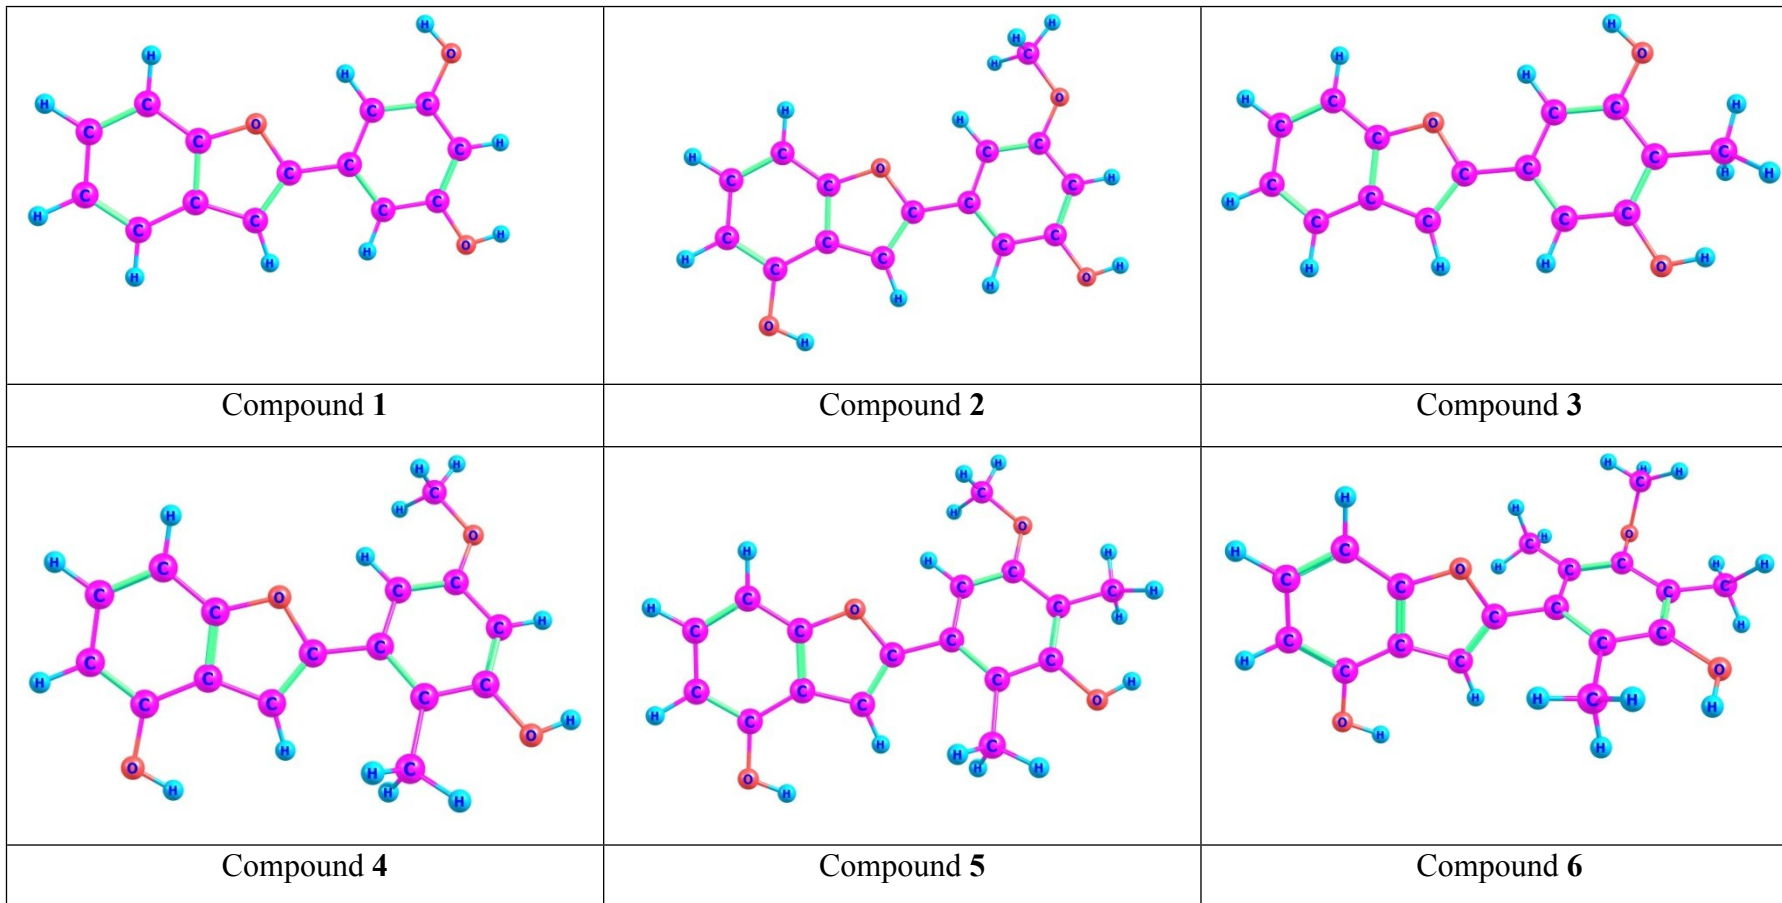

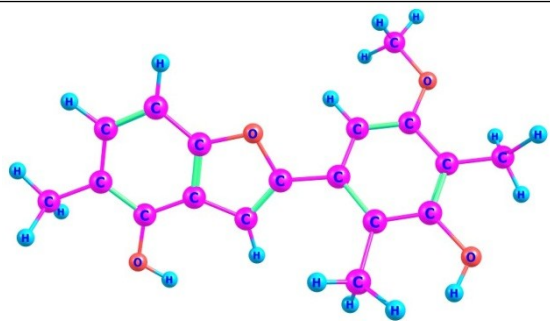

Compound 7

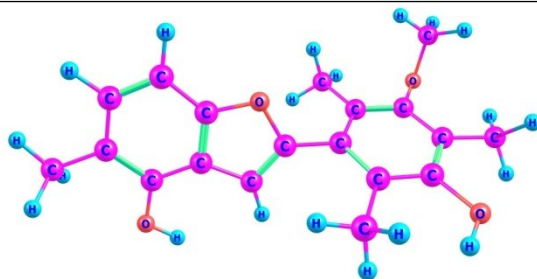

Compound 8

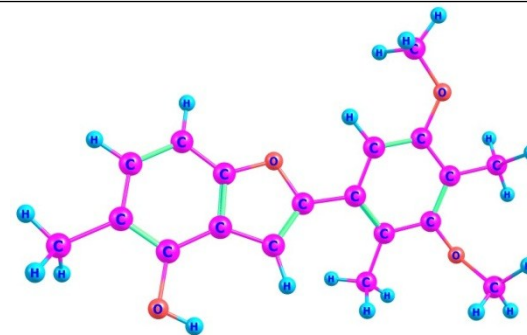

Compound 9

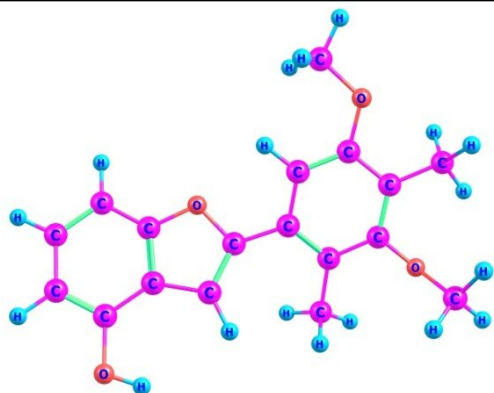

Compound 10

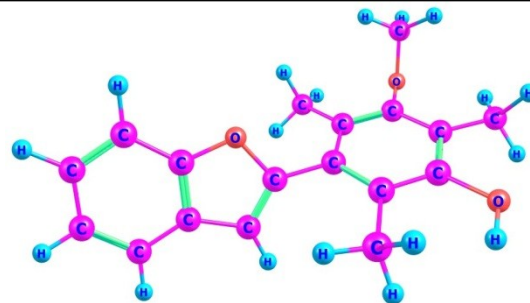

Compound 11

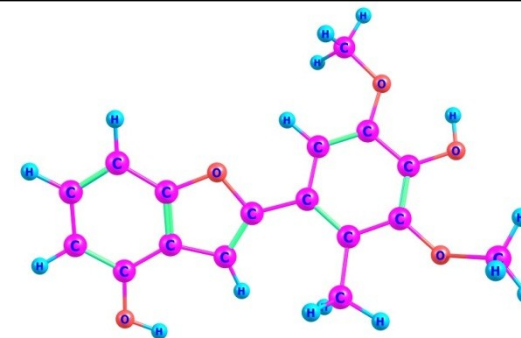

Compound 12

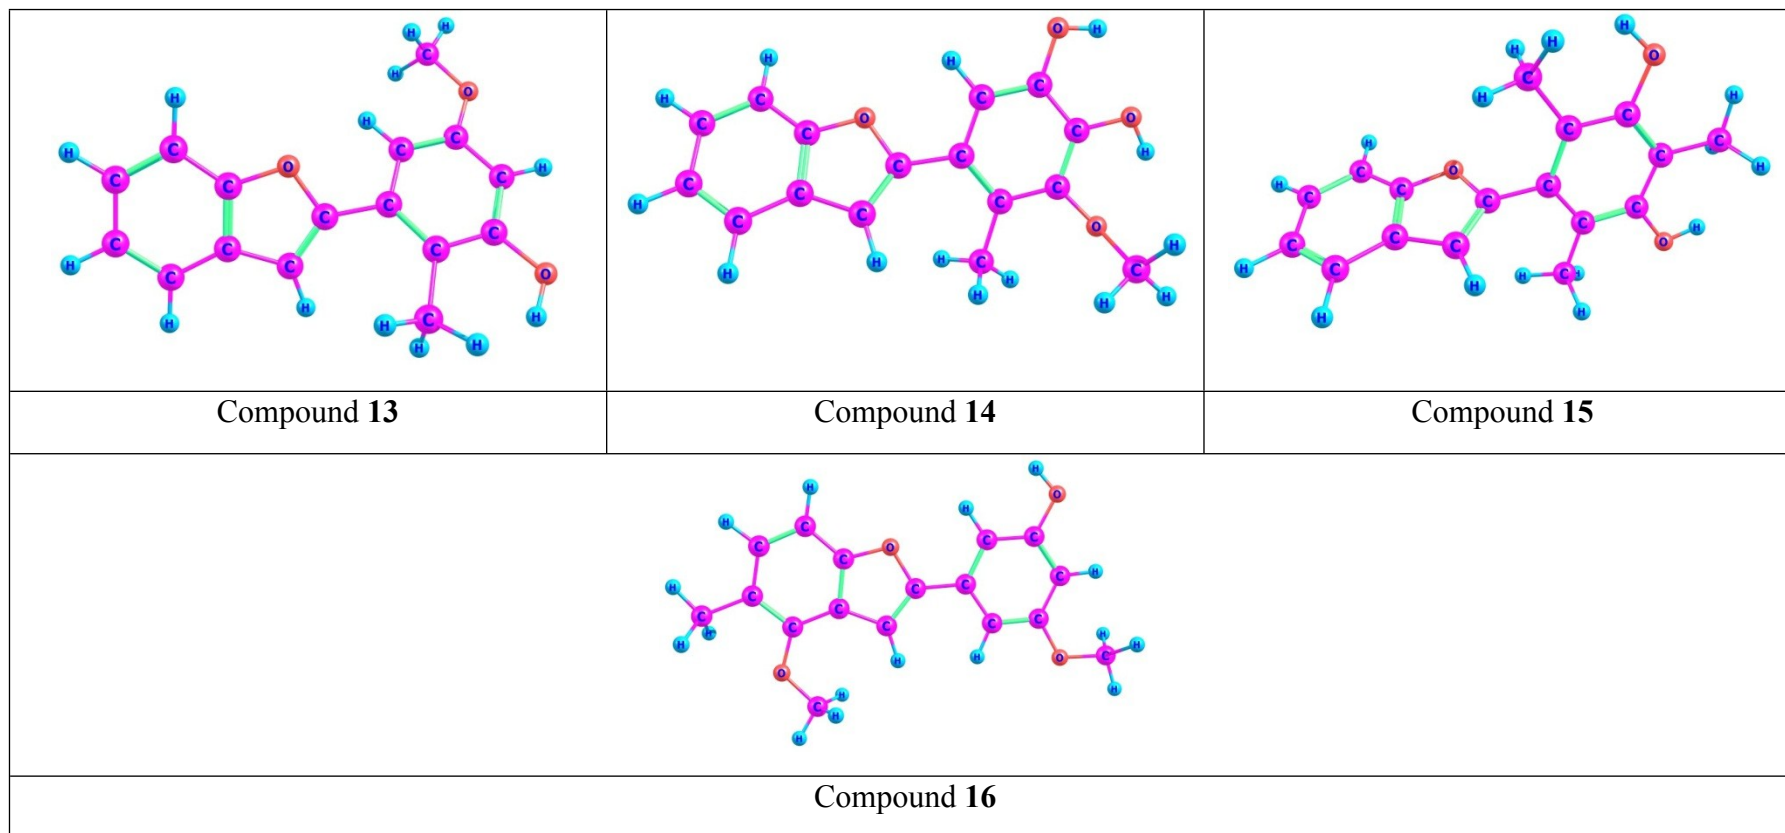

**Fig. S1.** The state forms of the structures **1-16** in all studied mediums at B3LYP/6-311++G(d,p) level of theory

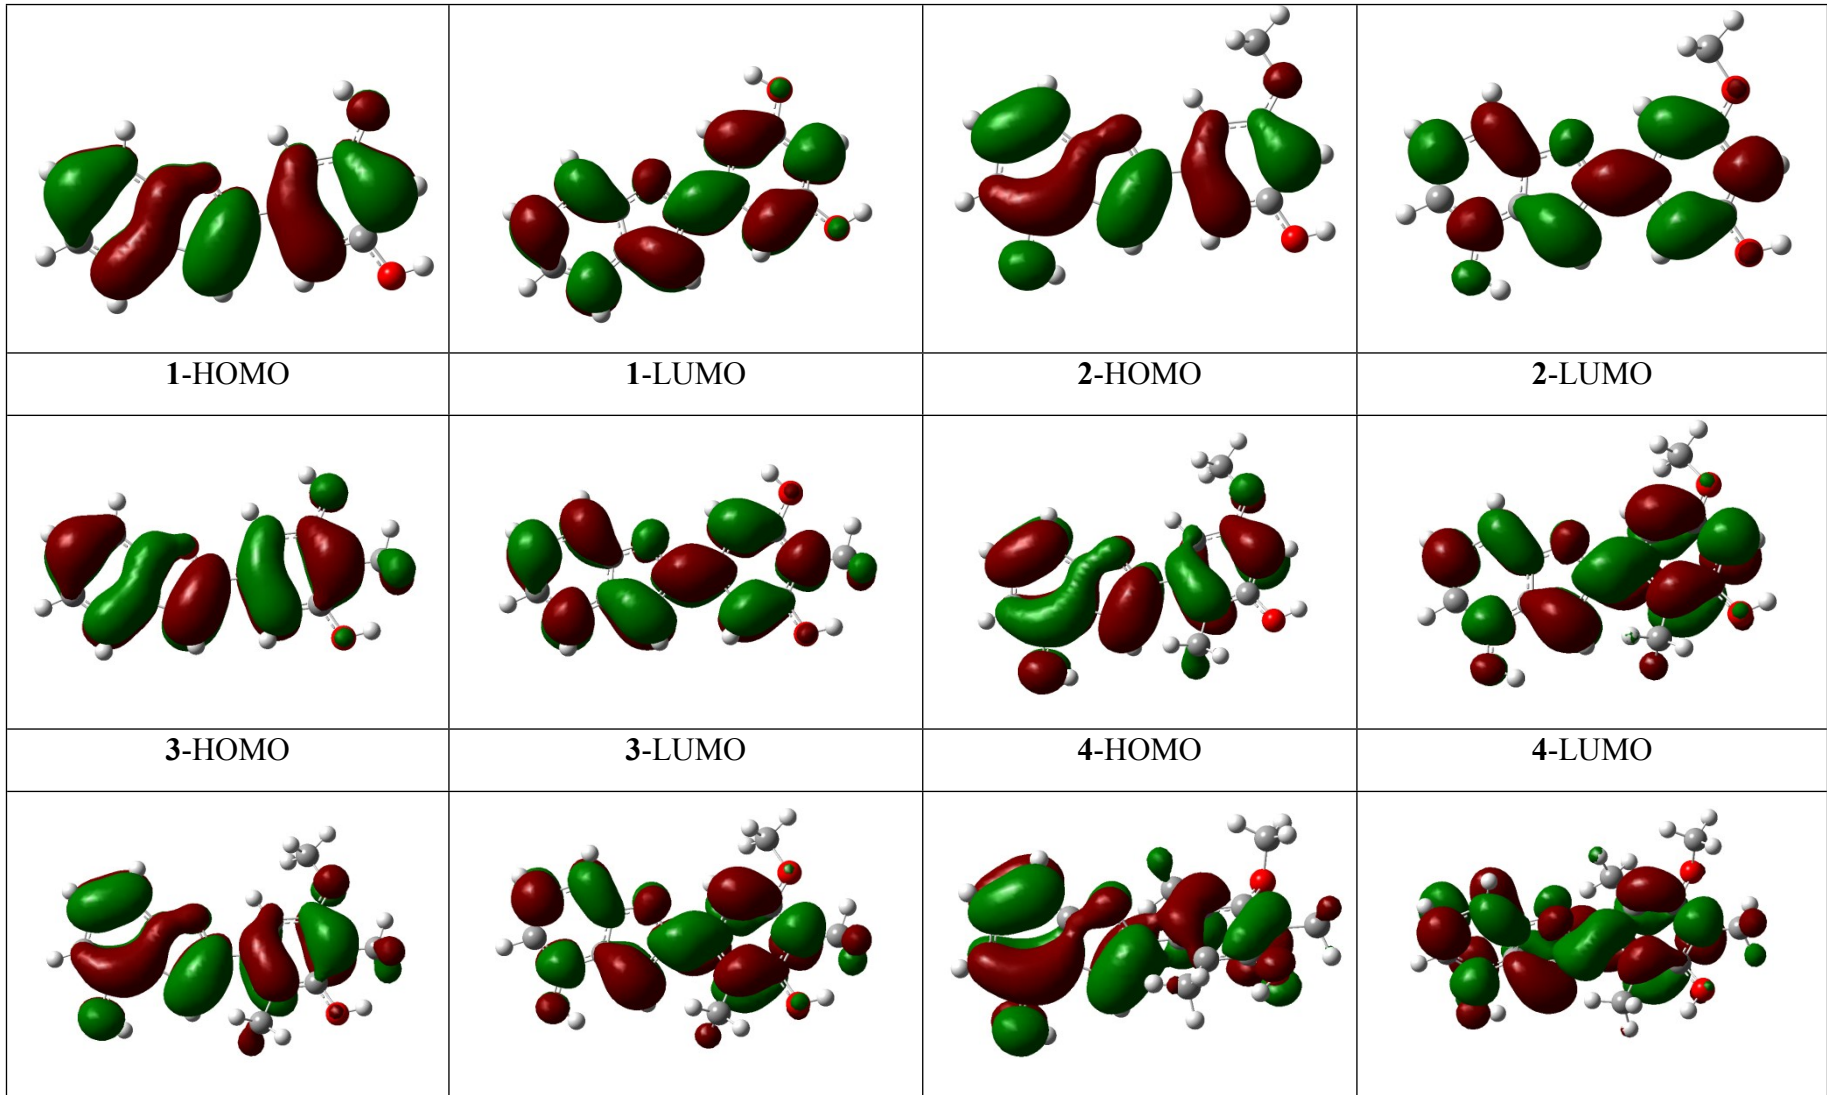

| 5-HOMO                                                                              | 5-LUMO                                                                               | 6-HOMO                                                                                | 6-LUMO                                                                                |
|-------------------------------------------------------------------------------------|--------------------------------------------------------------------------------------|---------------------------------------------------------------------------------------|---------------------------------------------------------------------------------------|
| 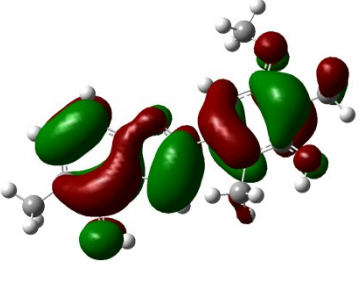   |    |    |    |
| 7-HOMO                                                                              | 7-LUMO                                                                               | 8-HOMO                                                                                | 8-LUMO                                                                                |
|    |    |    |    |
| 9-HOMO                                                                              | 9-LUMO                                                                               | 10-HOMO                                                                               | 10-LUMO                                                                               |
|  |  |  |  |



| 11-HOMO                                                                           | 11-LUMO                                                                            | 12-HOMO                                                                             | 12-LUMO                                                                             |
|-----------------------------------------------------------------------------------|------------------------------------------------------------------------------------|-------------------------------------------------------------------------------------|-------------------------------------------------------------------------------------|
| 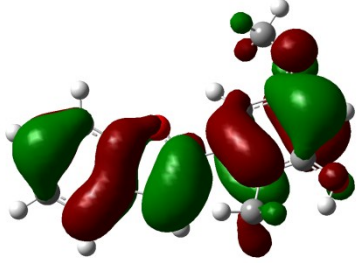 |  |  |  |
| 13-HOMO                                                                           | 13-LUMO                                                                            | 14-HOMO                                                                             | 14-LUMO                                                                             |
|  |  |  |  |
| 15-HOMO                                                                           | 15-LUMO                                                                            | 16-HOMO                                                                             | 16-LUMO                                                                             |

**Fig. S2.** HOMO and LUMO images of the neutral structures **1-16** in all studied mediums at B3LYP/6-311++G(d,p) level of theory

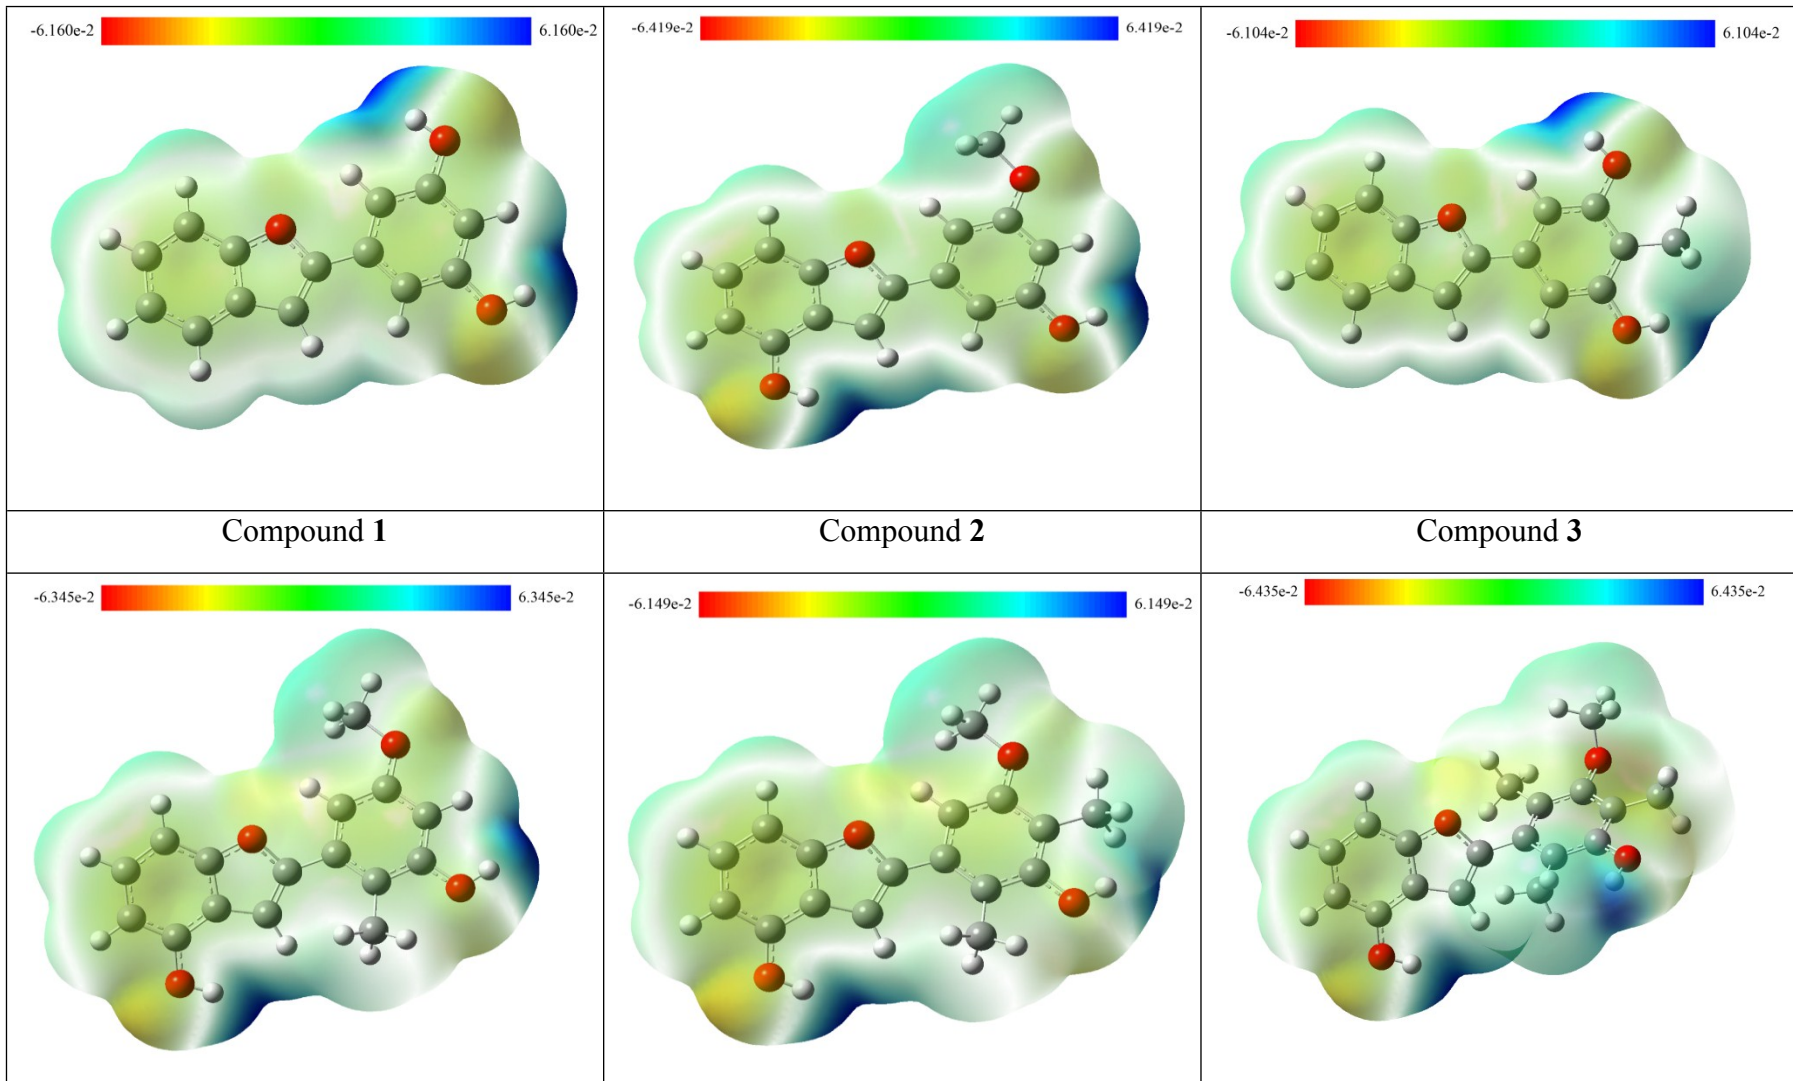

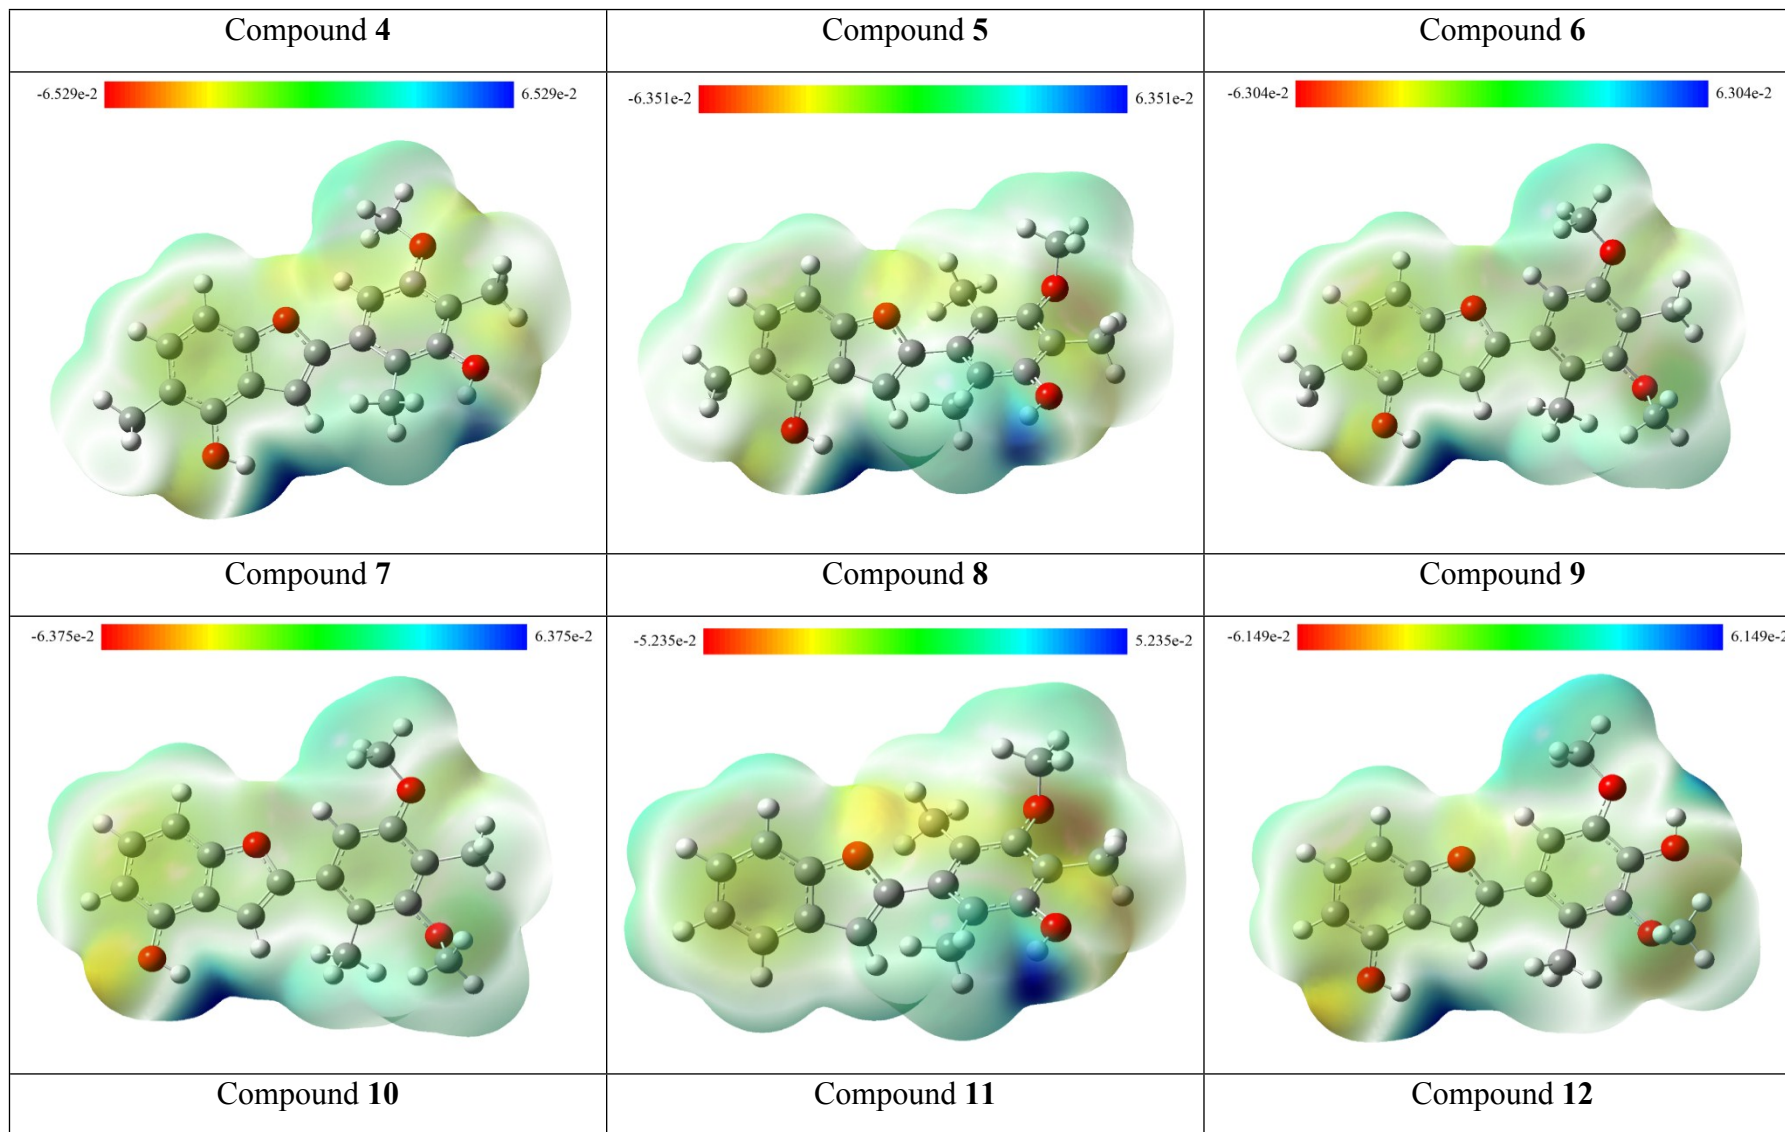



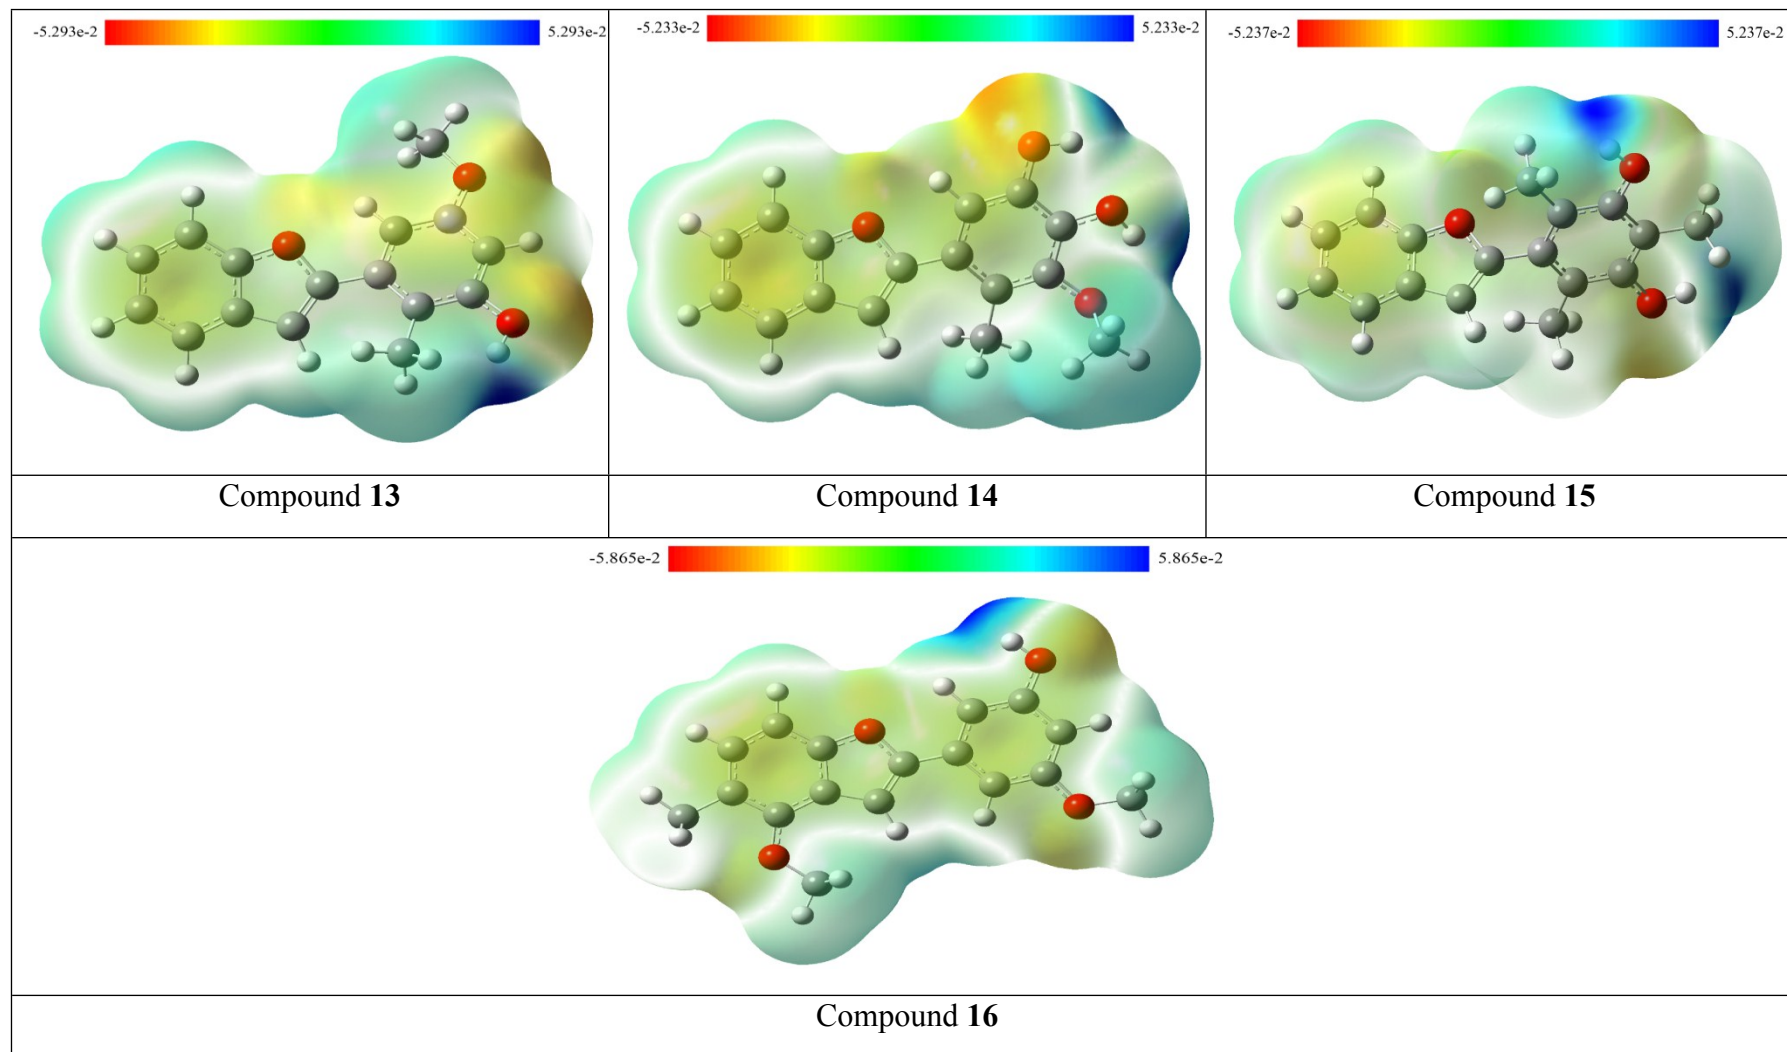

**Fig. S3.** Molecular electrostatic potential mapped on the isodensity surface for the neutral structures **1-16** at B3LYP/6-311++G(d,p) level of theory in gaseous phase

1-3' -OH (Int-1)

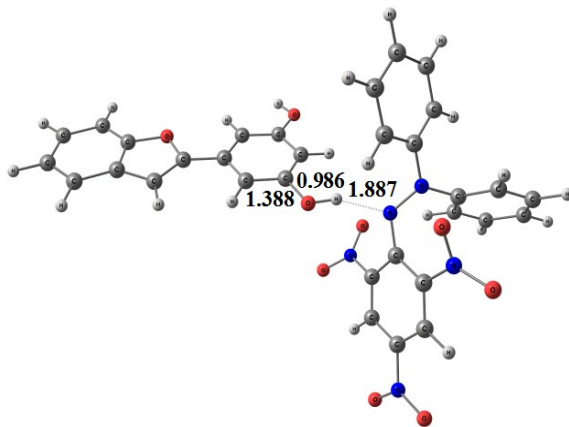

1-3' -OH (TS)

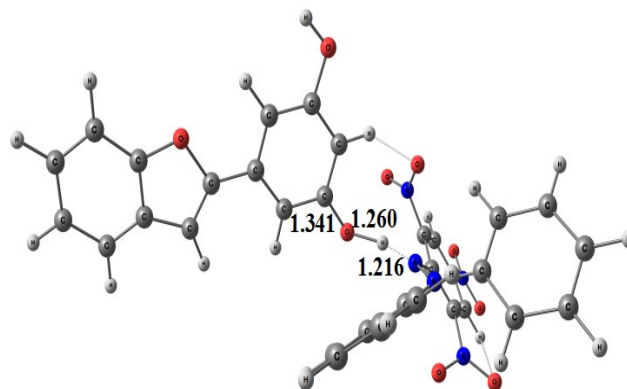

1-3' -OH (Int-2)

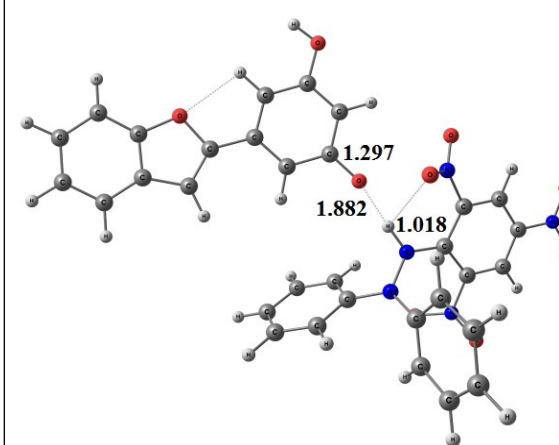

1-5' -OH (Int-1)

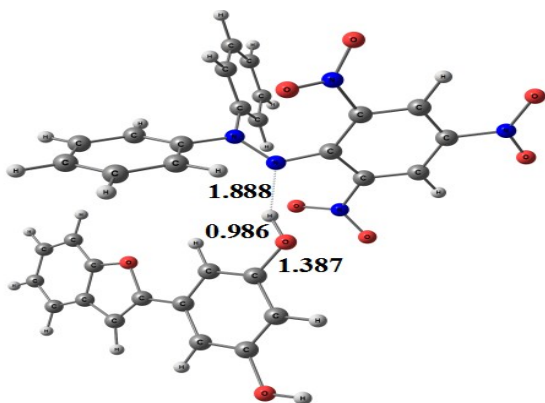

1-5' -OH (TS)

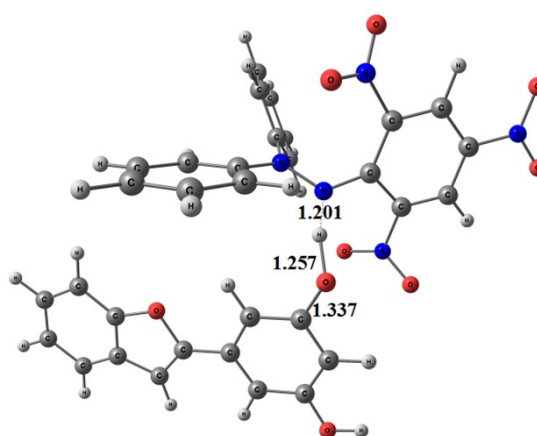

1-5' -OH (Int-2)

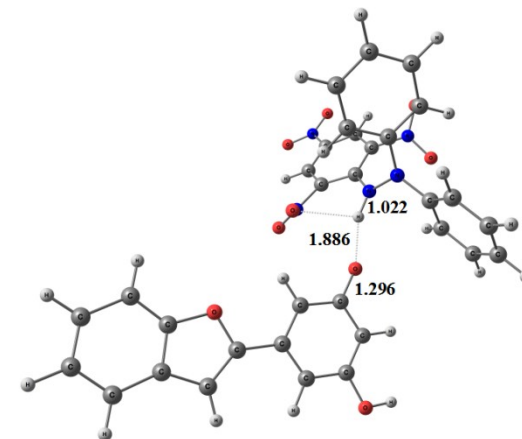

2-3' -OH (Int-1)

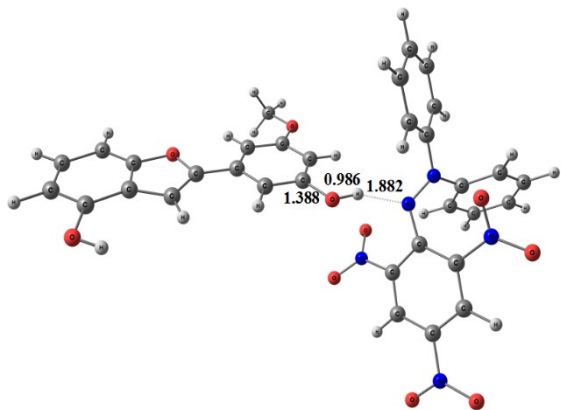

2-3' -OH (TS)

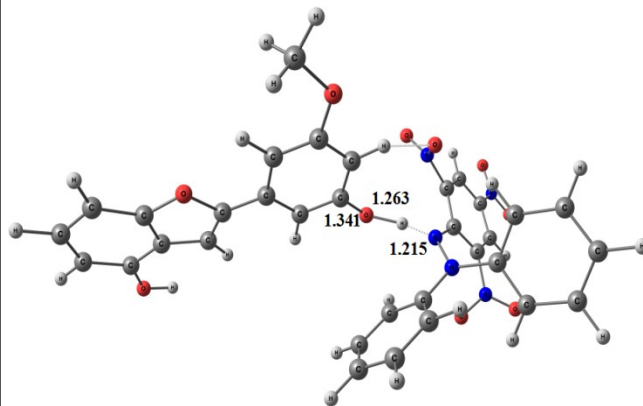

2-3' -OH (Int-2)

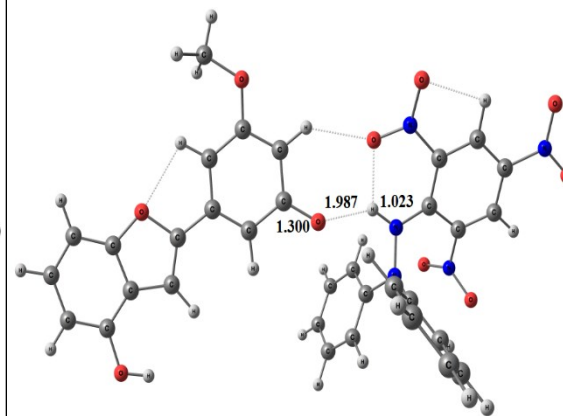

2-4-OH (Int-1)

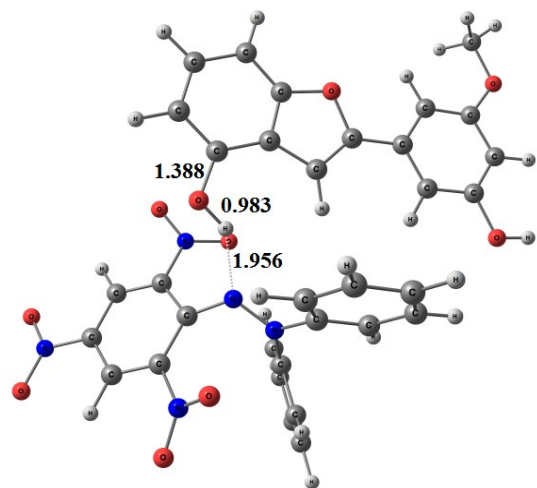

2-4-OH (TS)

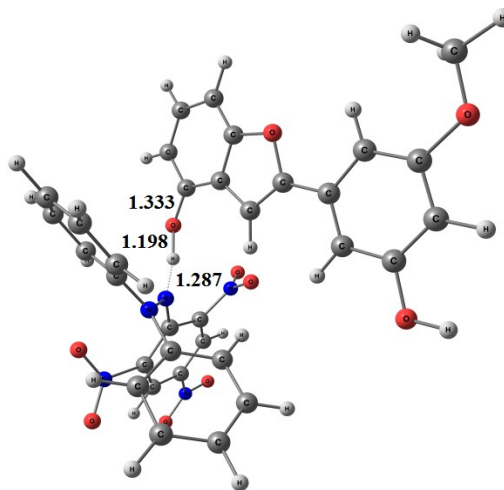

2-4-OH (Int-2)

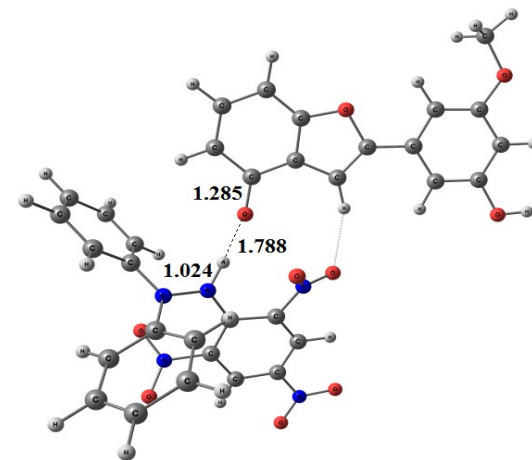

3-3' -OH (Int-1)

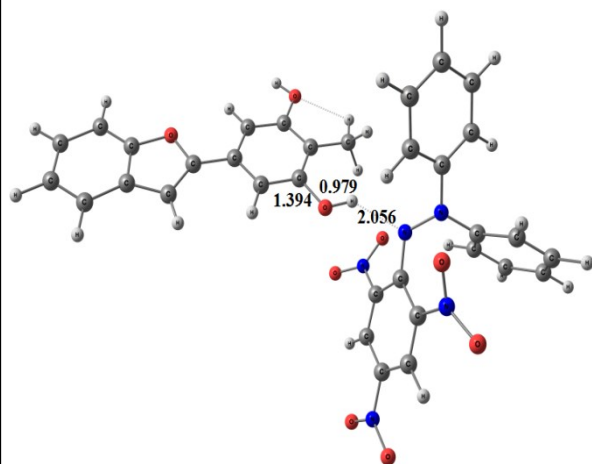

3-3' -OH (TS)

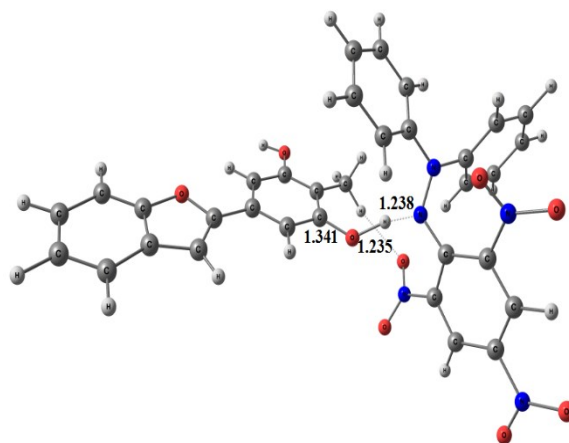

3-5' -OH (Int-2)

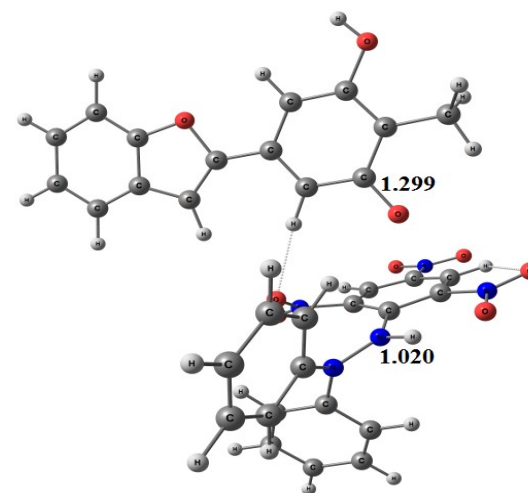

3-5' -OH (Int-1)

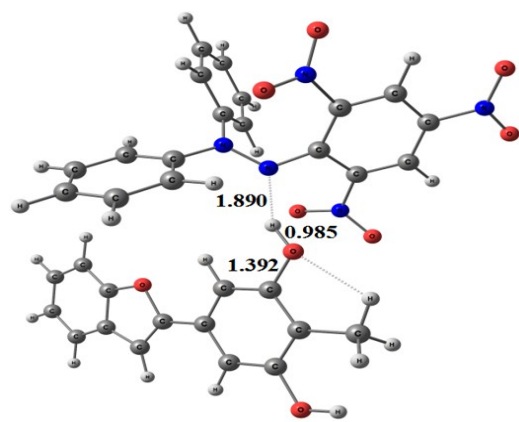

3-5' -OH (TS)

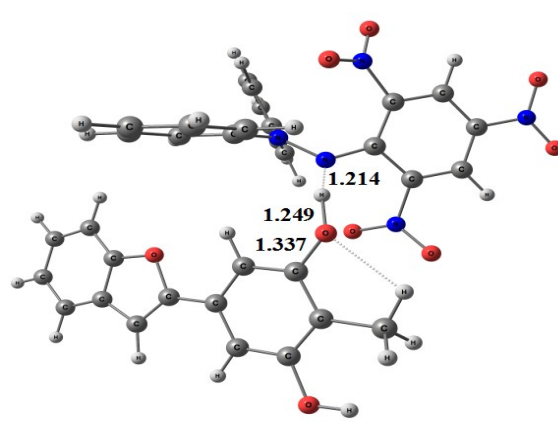

3-5' -OH (Int-2)

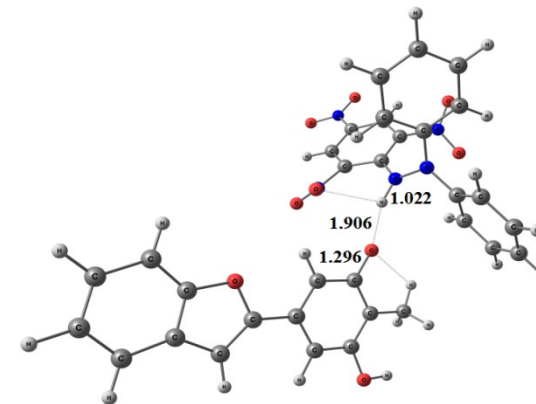



4-3' -OH (Int-1)

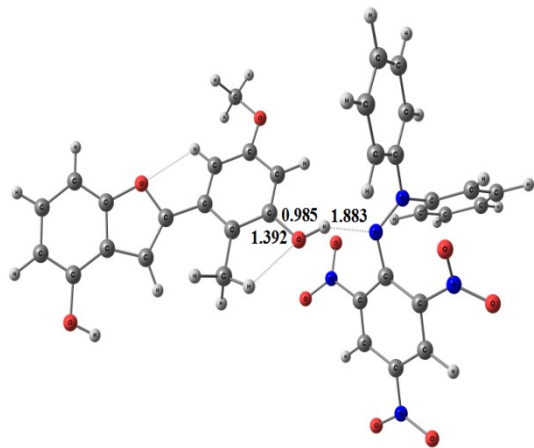

4-3' -OH (TS)

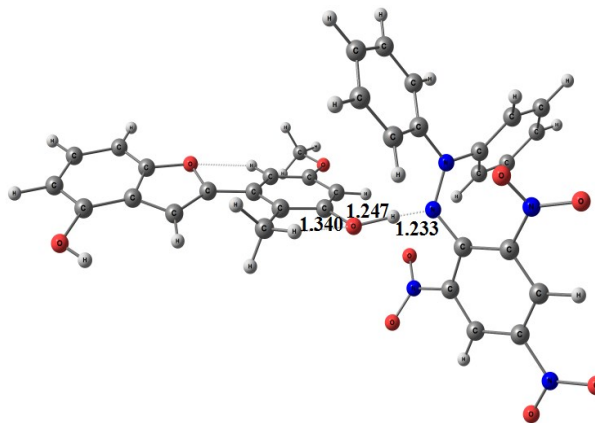

4-3' -OH (Int-2)

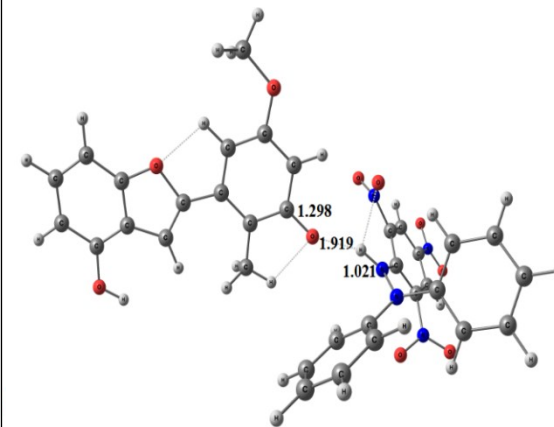

4-4-OH (Int-1)

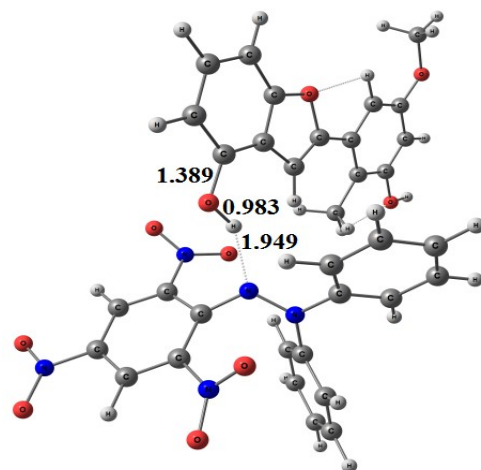

4-4-OH (TS)

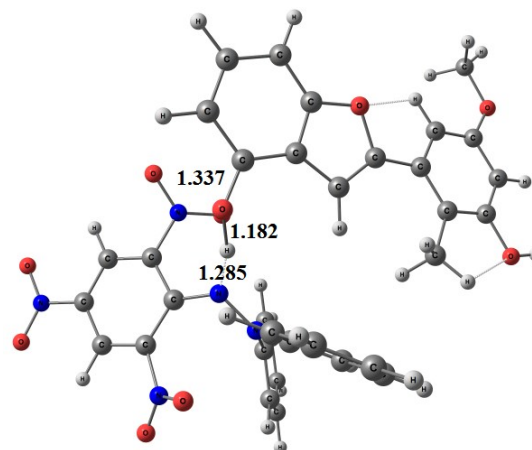

4-4-OH (Int-2)

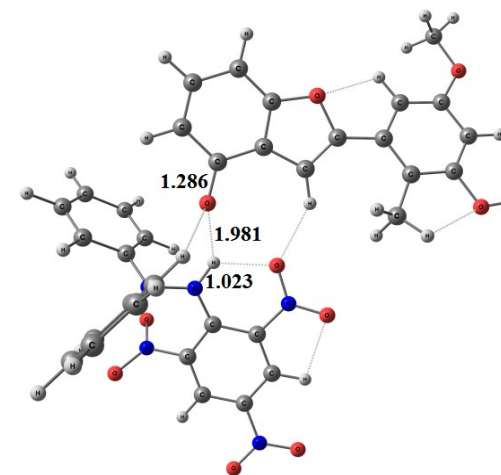

5-3' -OH (Int-1)

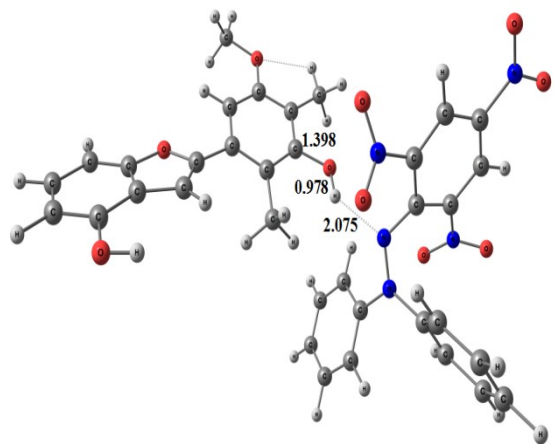

5-3' -OH (TS)

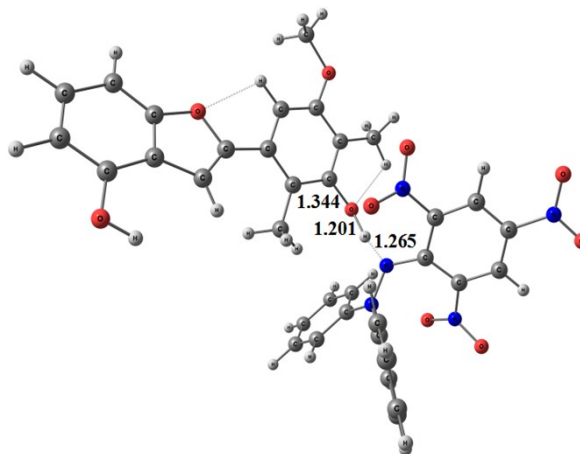

5-3' -OH (Int-2)

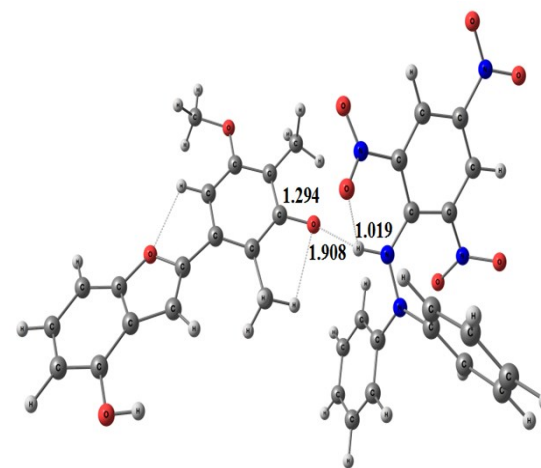

5-4-OH (Int-1)

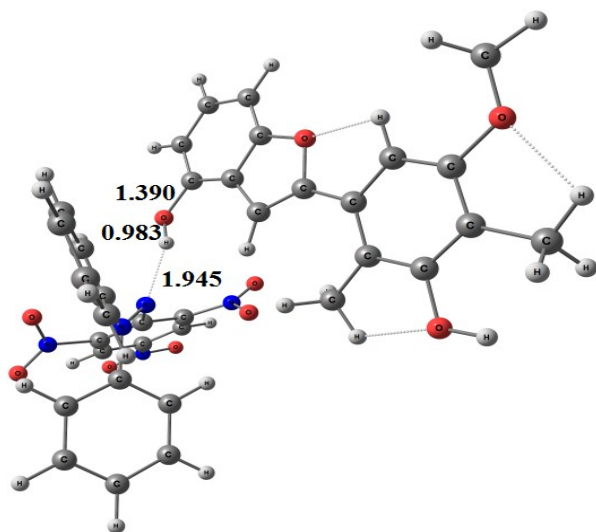

5-4-OH (TS)

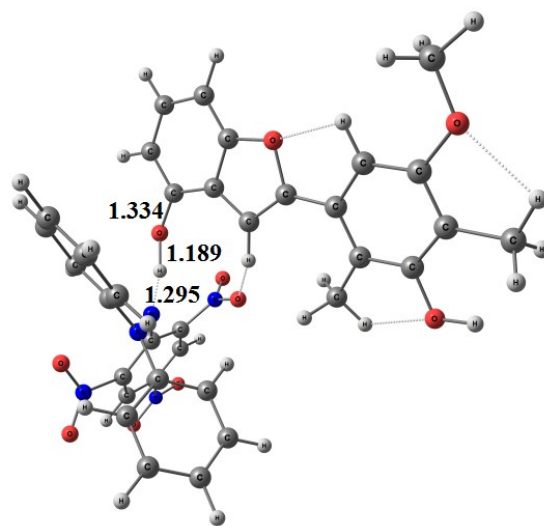

5-4-OH (Int-2)

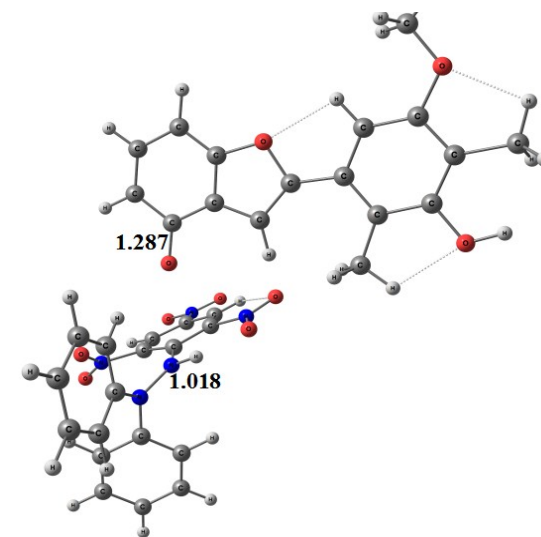

6-4-OH (Int-1)

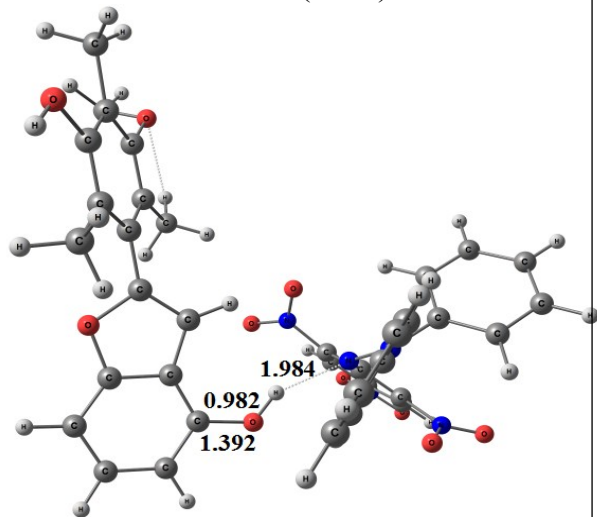

6-4-OH (TS)

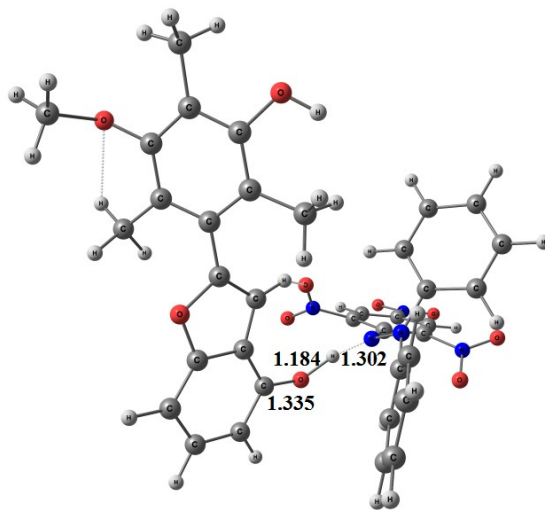

6-4-OH (Int-2)

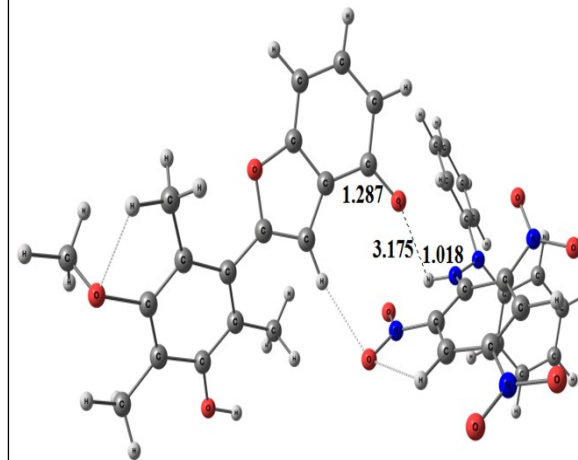

6-3' -OH (Int-1)

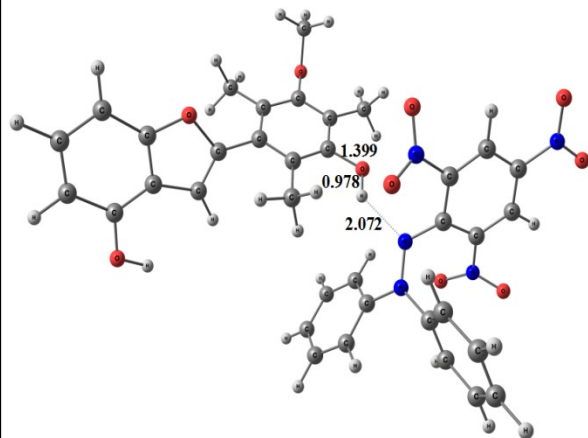

6-3' -OH (TS)

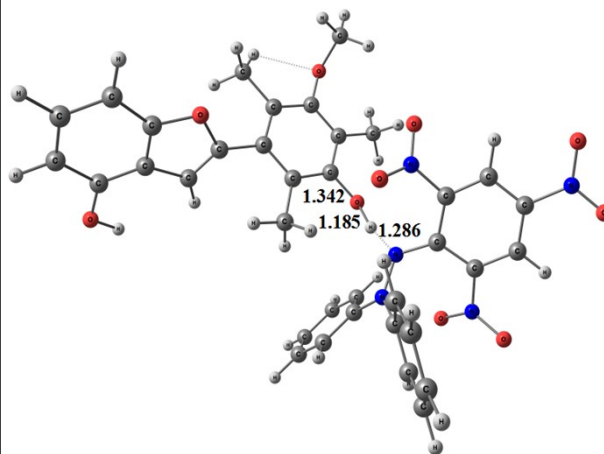

6-3' -OH (Int-2)

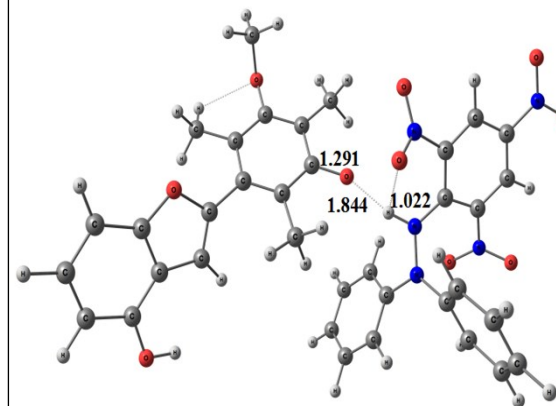

7-4-OH (Int-1)

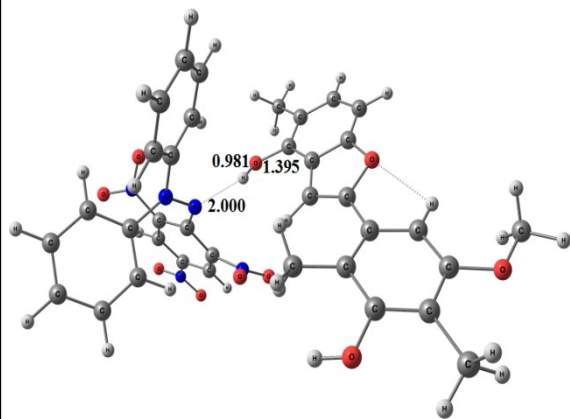

7-4-OH (TS)

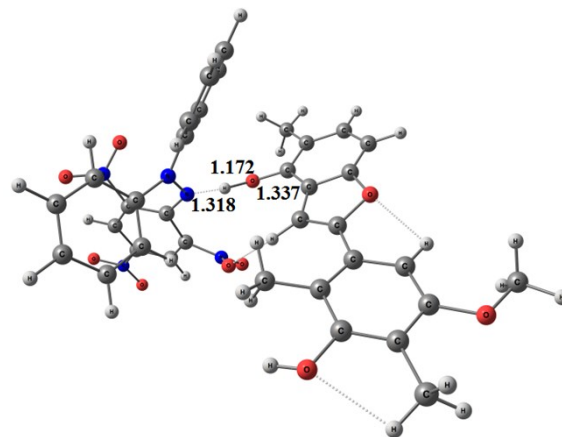

7-4-OH (Int-2)

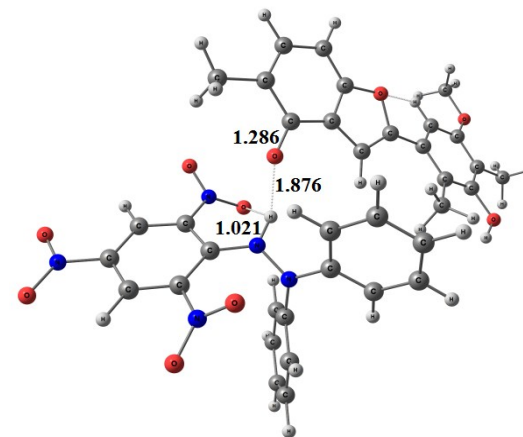

7-3'-OH (Int-1)

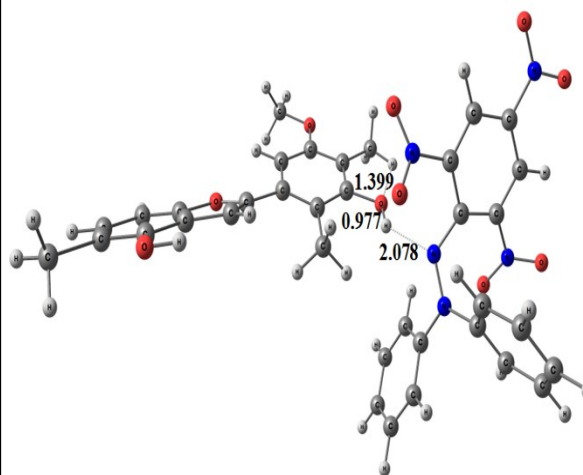

7-3'-OH (TS)

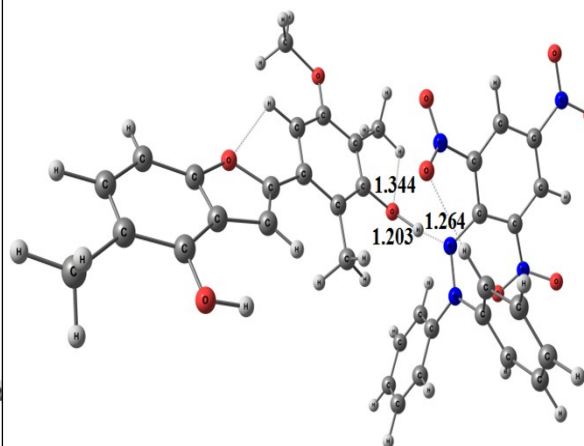

7-3'-OH (Int-2)

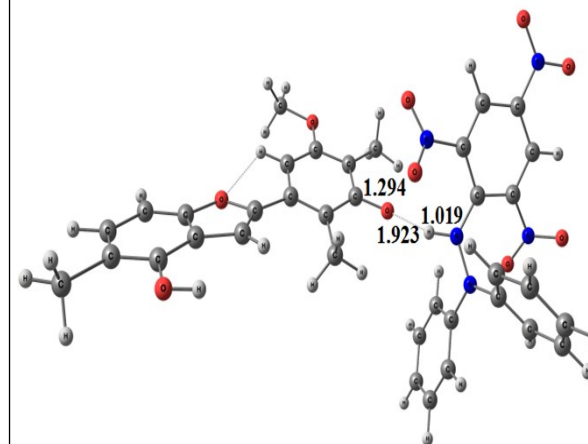



**8-4-OH (Int-1)**

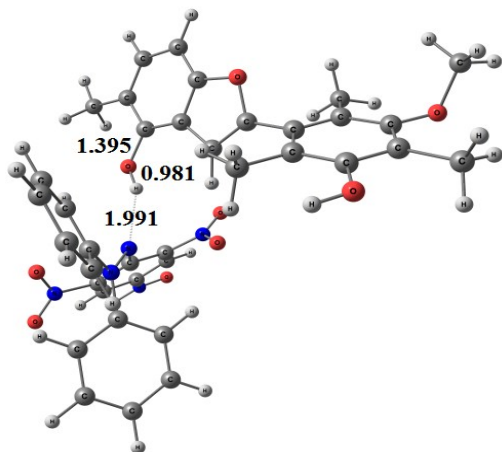

**8-4-OH (TS)**

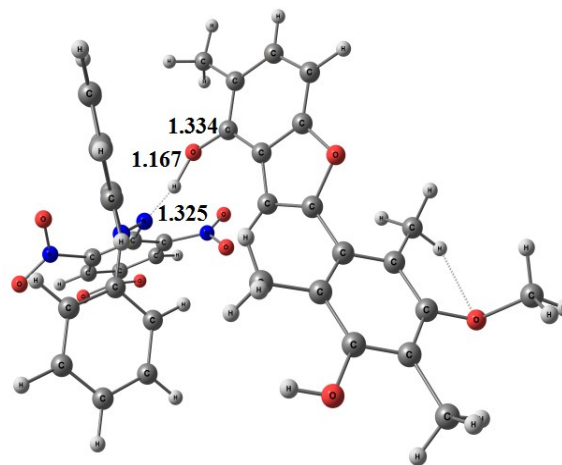

**8-4-OH (Int-2)**

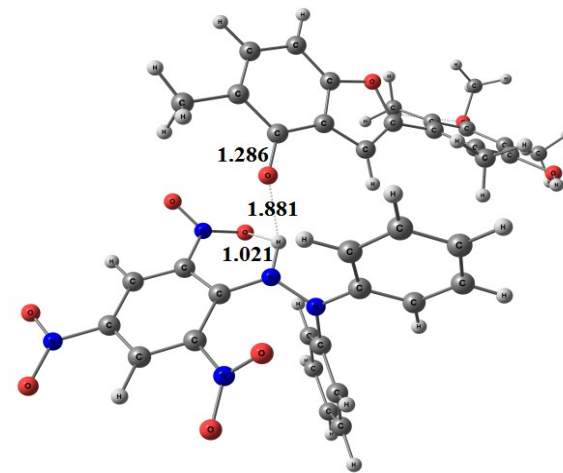

**8-3'-OH (Int-1)**

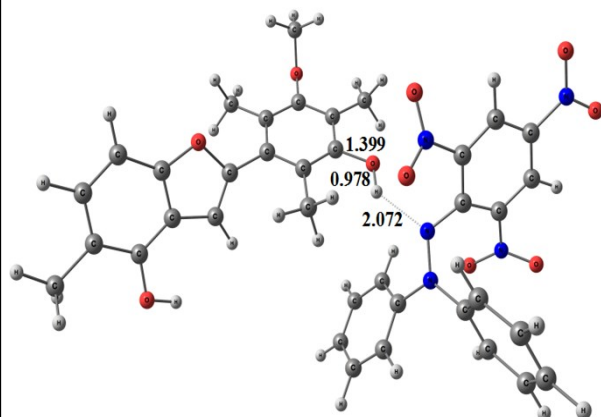

**8-3'-OH (TS)**

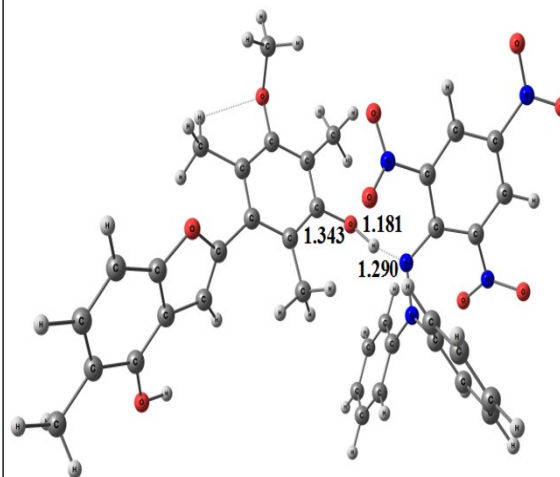

**8-3'-OH (Int-2)**

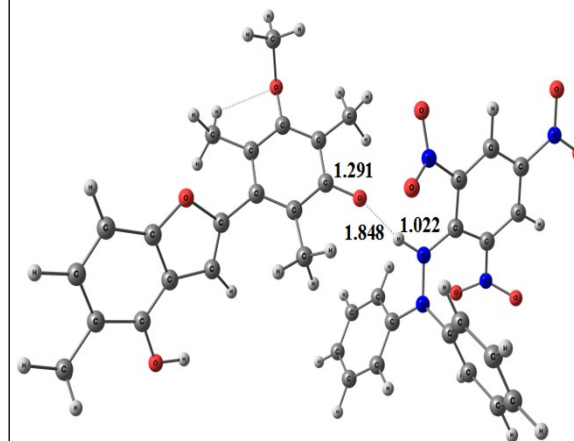

9-4-OH (Int-1)

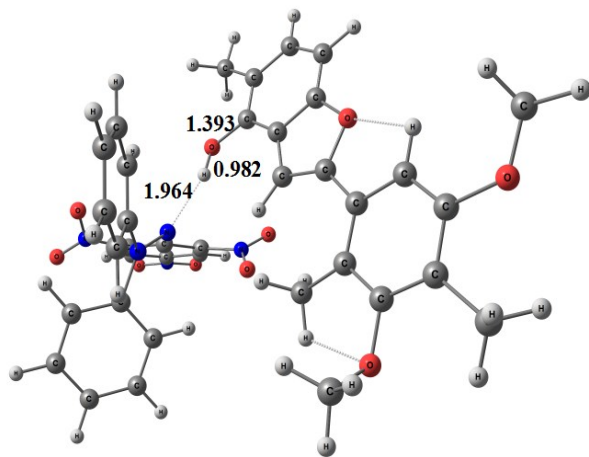

9-4-OH (TS)

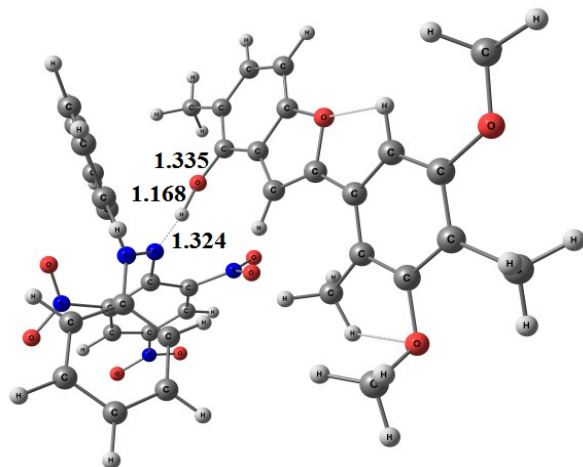

9-4-OH (Int-2)

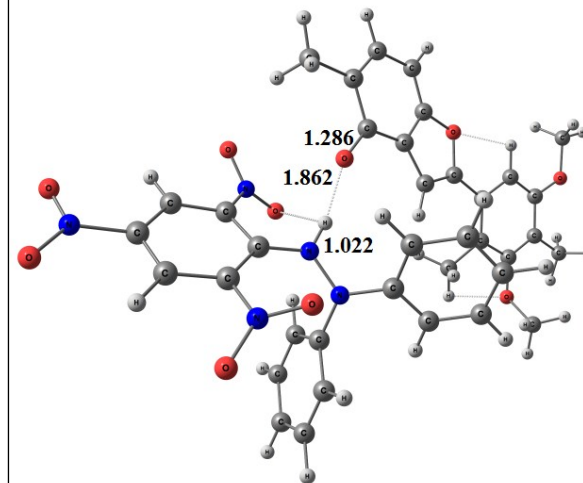

10-4-OH (Int-1)

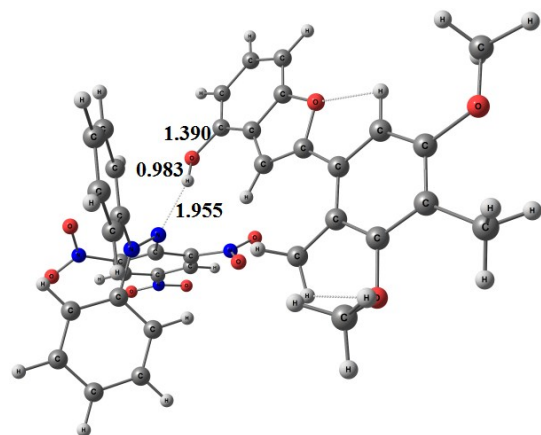

10-4-OH (TS)

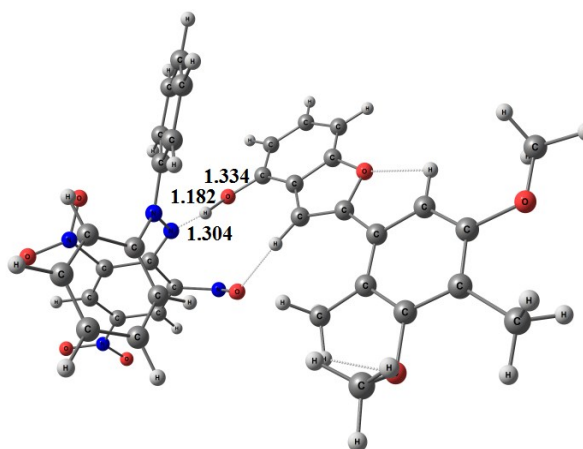

10-4-OH (Int-2)

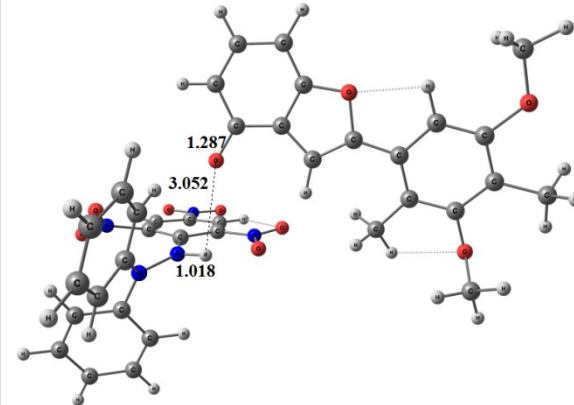

11-3' -OH (Int-1)

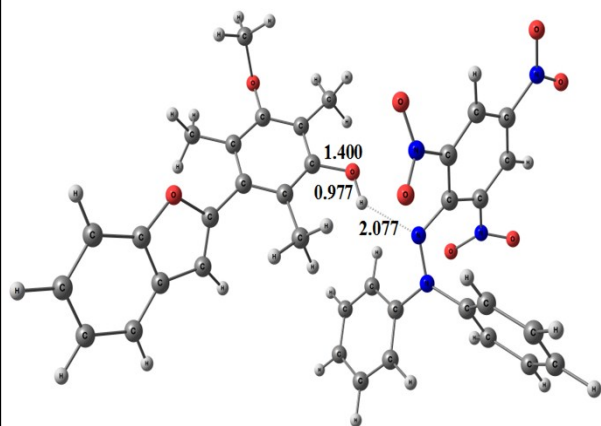

11-3' -OH (TS)

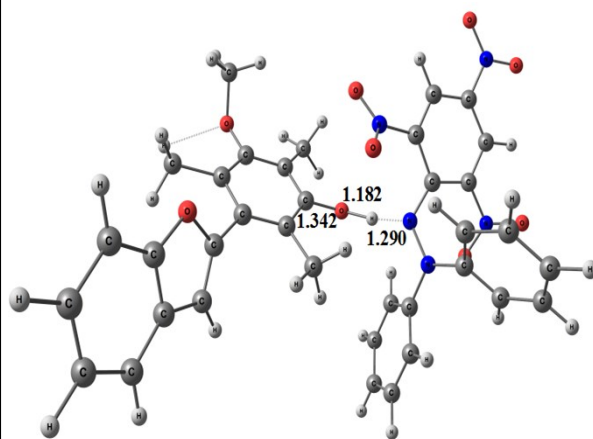

11-3' -OH (Int-2)

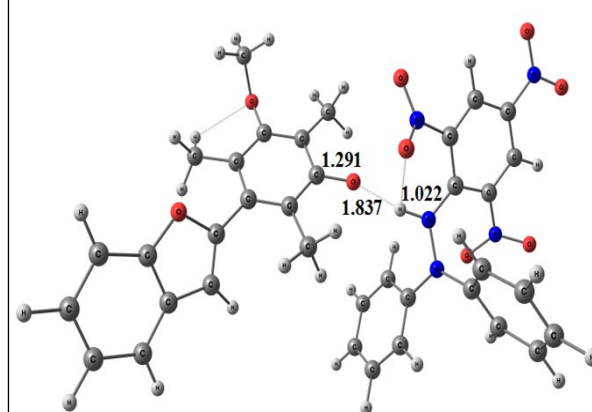

12-4-OH (Int-1)

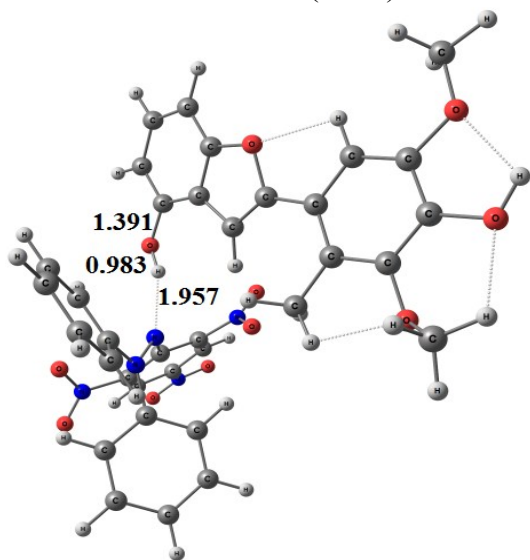

12-4-OH (TS)

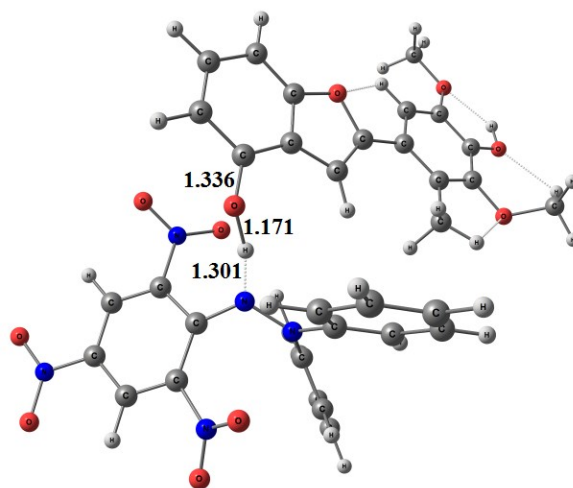

12-4-OH (Int-2)

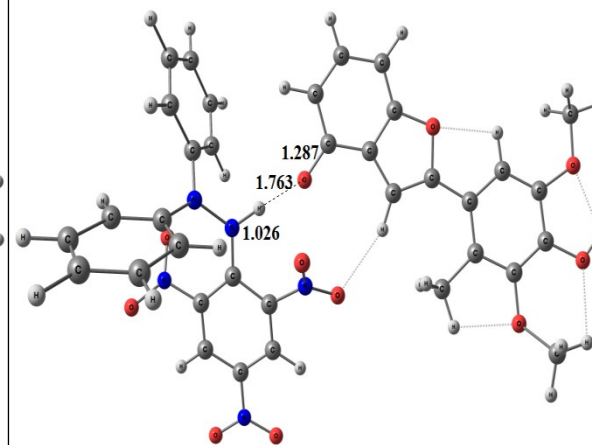

**12-4' -OH (Int-1)**

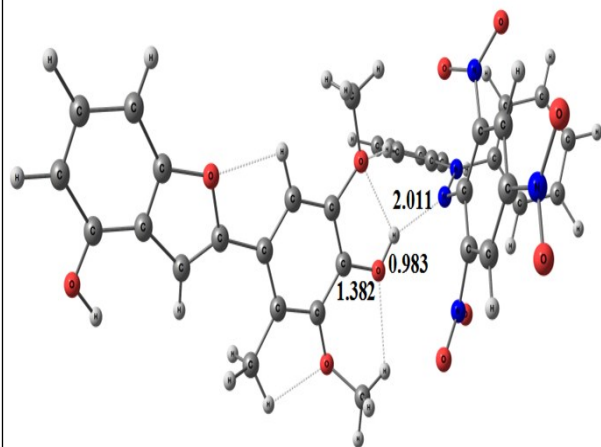

**12-4' -OH (TS)**

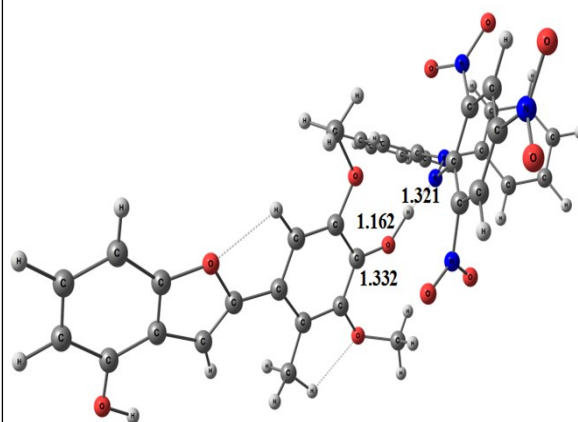

**12-4' -OH (Int-2)**

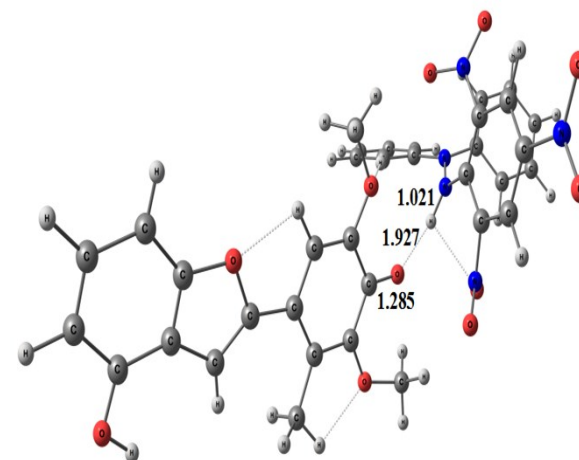

**13-3' -OH (Int-1)**

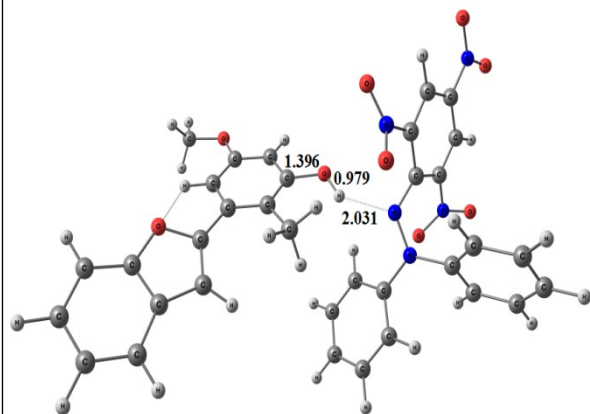

**13-3' -OH (TS)**

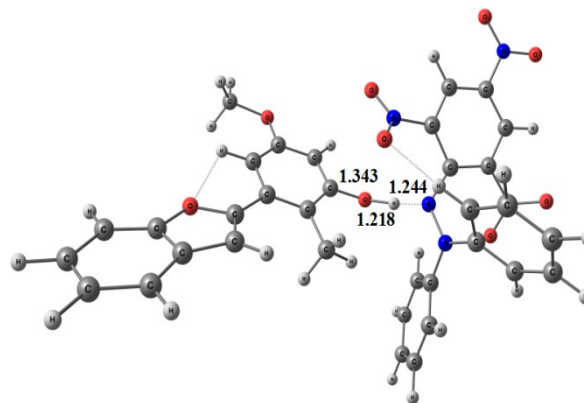

**13-3' -OH (Int-2)**

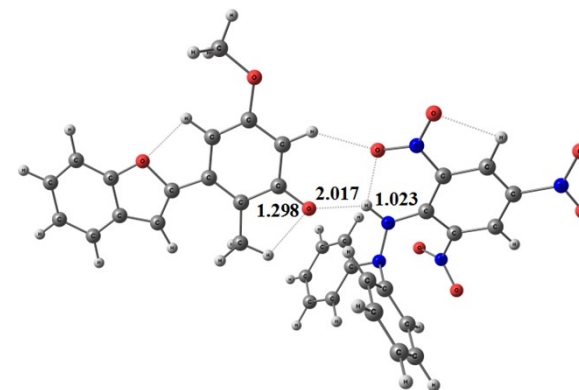



14-4' -OH (Int-1)

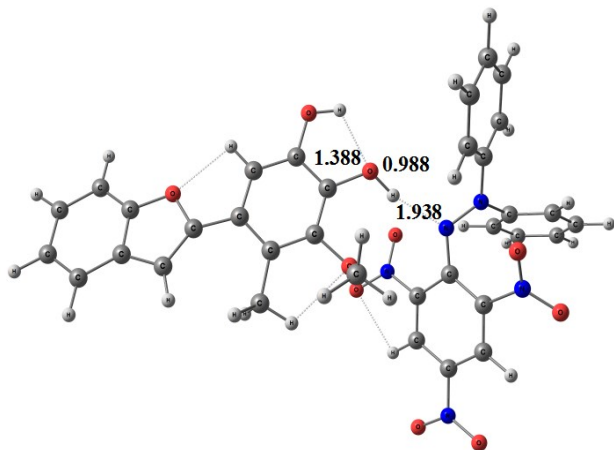

14-4' -OH (TS)

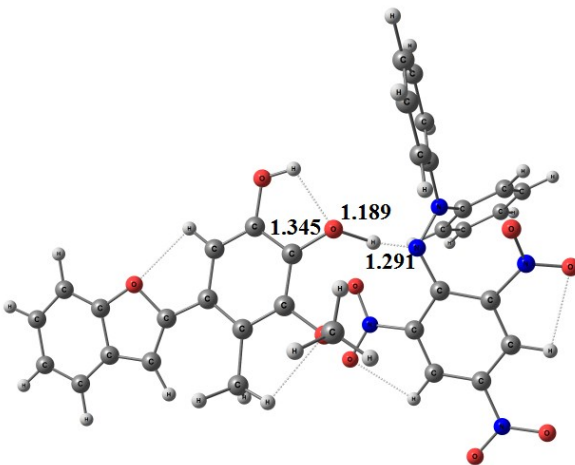

14-4' -OH (Int-2)

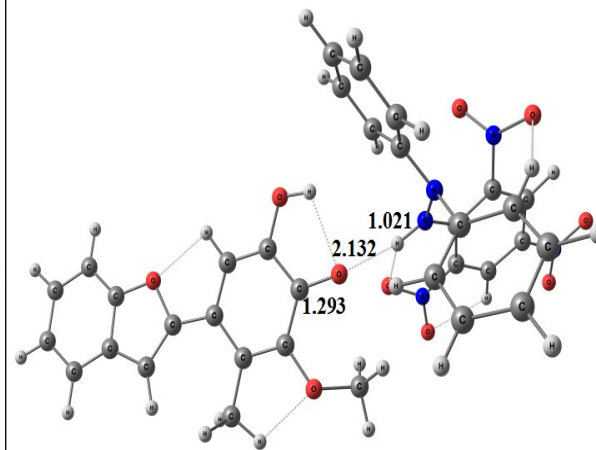

14-5' -OH

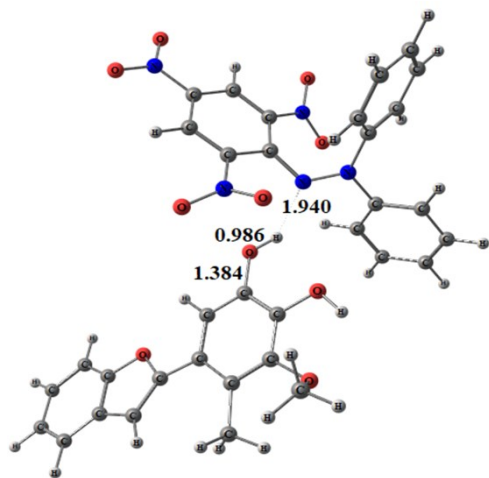

14-5' -OH (TS)

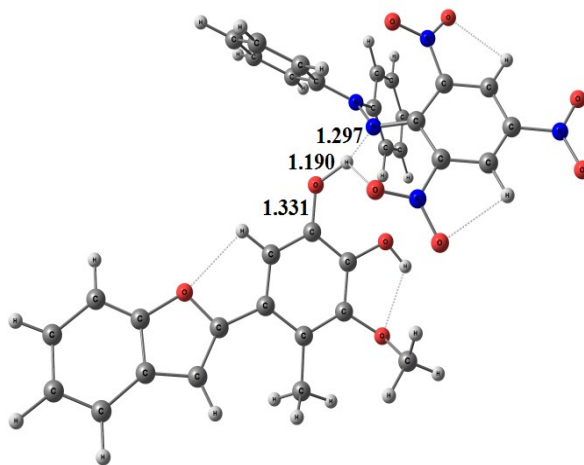

14-5' -OH (Int-2)

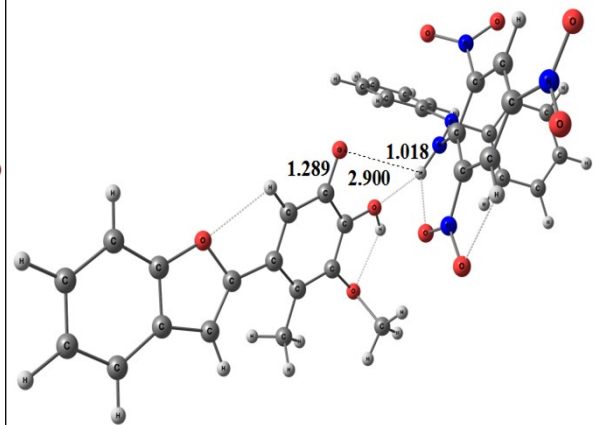

15-3' -OH (Int-1)

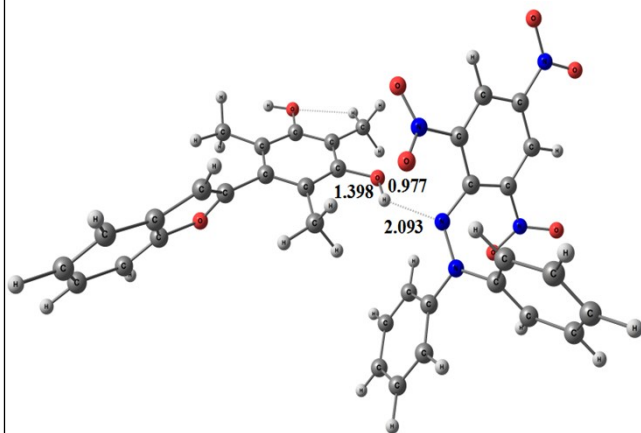

15-3' -OH (TS)

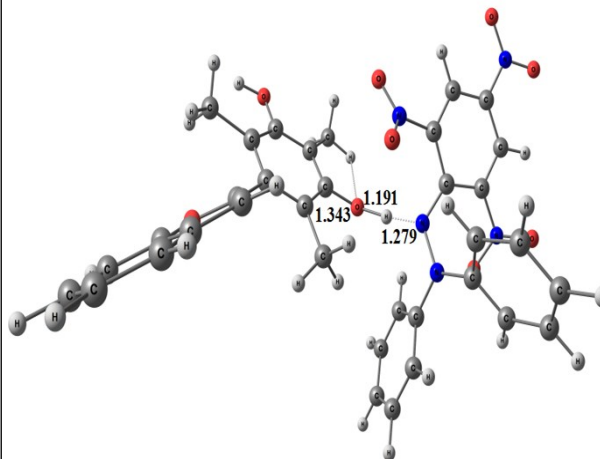

15-3' -OH (Int-2)

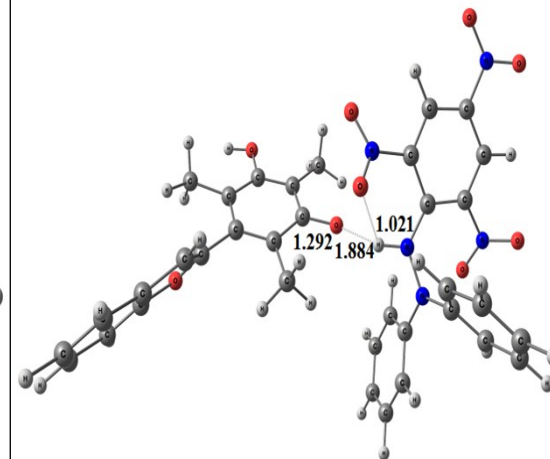

15-5' -OH (Int-1)

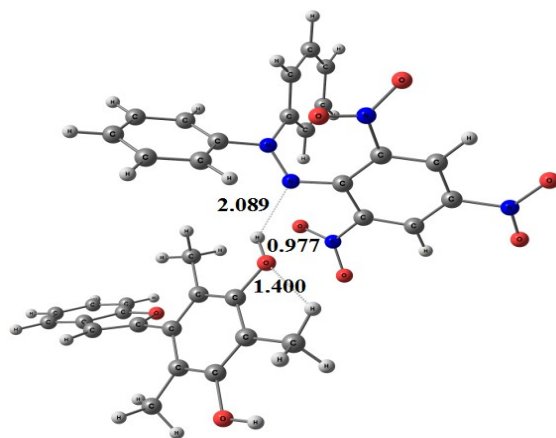

15-5' -OH (TS)

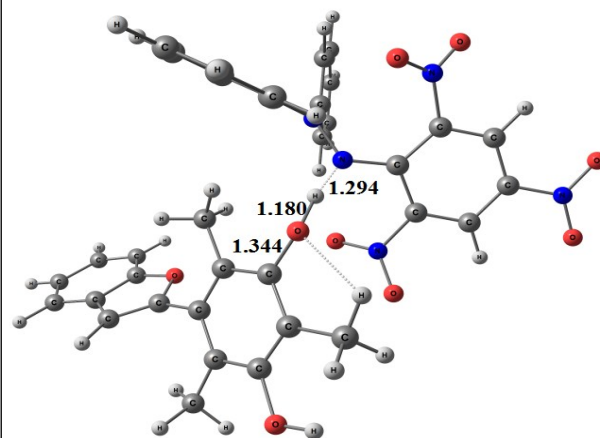

15-5' -OH (Int-2)

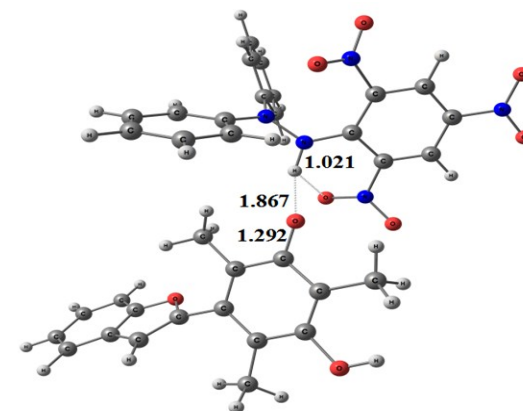

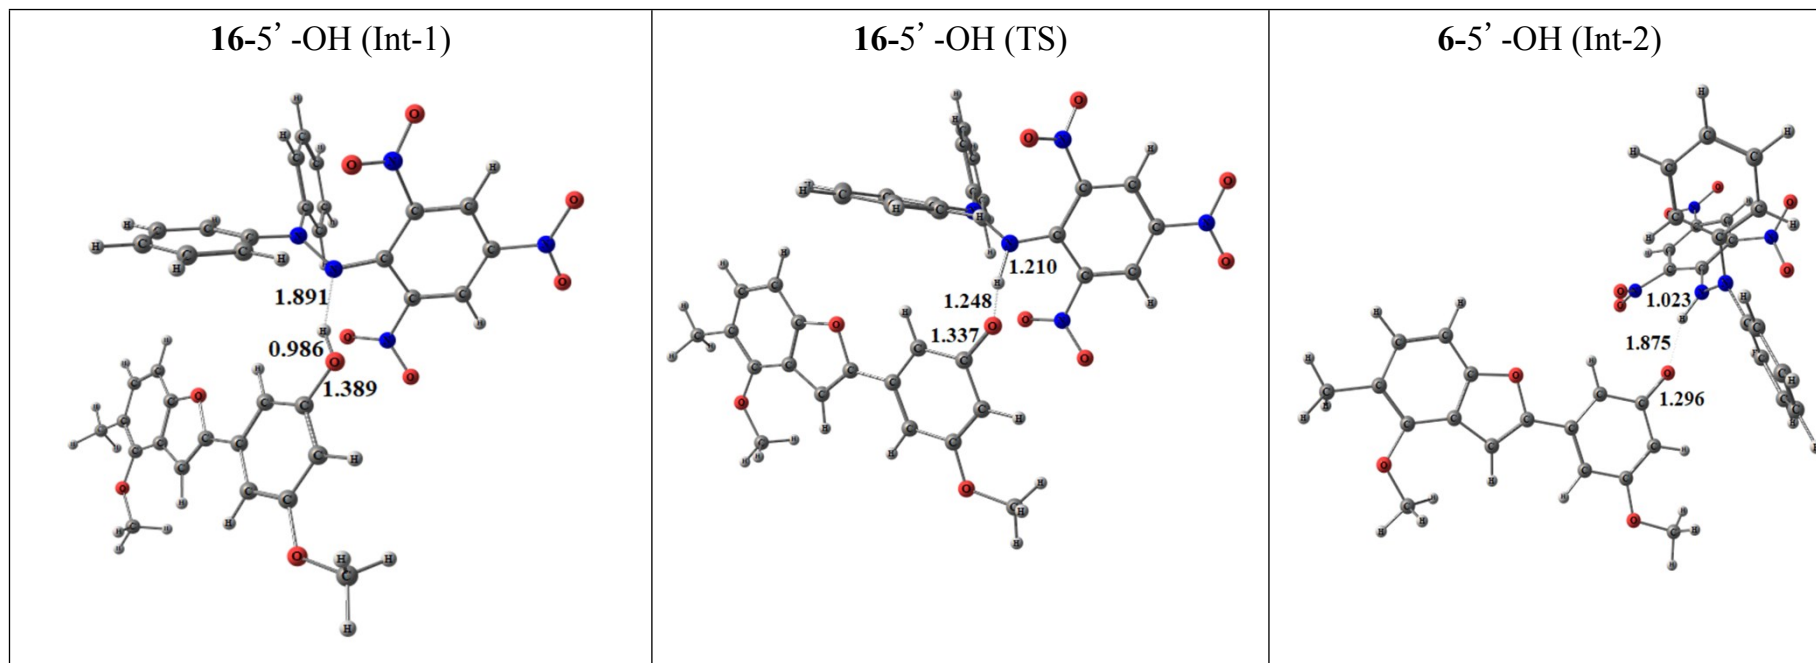

**Fig. S4.** The optimized structures of intermediates (Ints) and transition states (TSs) of DPPH radicals attack to the compounds **1-16** at B3LYP/6-311G level of theory

Table S1. The selective bond lengths and dihedral angles ( $\theta$ ) of the optimized structures **1-16** in the studied mediums at B3LYP/6-311++G(d,p) level of theory

| No       | Mediums  | Bond lengths |         |         |         | Dihedral angles            |
|----------|----------|--------------|---------|---------|---------|----------------------------|
|          |          | 4(O-H)       | 3'(O-H) | 4'(O-H) | 5'(O-H) | $\theta_2$ (C3-C2-C1'-C2') |
| <b>1</b> | Gas      |              | 0.963   |         | 0.963   | 0.002                      |
|          | Water    |              | 0.965   |         | 0.965   | -0.003                     |
|          | Methanol |              | 0.965   |         | 0.965   | 0.001                      |
|          | Acetone  |              | 0.965   |         | 0.965   | 0.001                      |
| <b>2</b> | Gas      | 0.962        | 0.963   |         |         | 0.001                      |
|          | Water    | 0.964        | 0.965   |         |         | -0.001                     |
|          | Methanol | 0.964        | 0.965   |         |         | 0.001                      |
|          | Acetone  | 0.964        | 0.965   |         |         | 0.001                      |
| <b>3</b> | Gas      |              | 0.963   |         | 0.963   | 0.003                      |
|          | Water    |              | 0.964   |         | 0.965   | 0.002                      |
|          | Methanol |              | 0.964   |         | 0.965   | 0.003                      |
|          | Acetone  |              | 0.964   |         | 0.964   | 0.001                      |
| <b>4</b> | Gas      | 0.962        | 0.963   |         |         | -26.050                    |
|          | Water    | 0.964        | 0.965   |         |         | -28.794                    |
|          | Methanol | 0.964        | 0.965   |         |         | -28.865                    |
|          | Acetone  | 0.964        | 0.964   |         |         | -28.860                    |
| <b>5</b> | Gas      | 0.962        | 0.962   |         |         | -28.747                    |
|          | Water    | 0.964        | 0.964   |         |         | -28.747                    |
|          | Methanol | 0.964        | 0.964   |         |         | -28.865                    |
|          | Acetone  | 0.964        | 0.964   |         |         | -28.709                    |
| <b>6</b> | Gas      | 0.962        | 0.962   |         |         | -65.083                    |
|          | Water    | 0.964        | 0.964   |         |         | -64.588                    |
|          | Methanol | 0.964        | 0.964   |         |         | -64.778                    |
|          | Acetone  | 0.964        | 0.964   |         |         | -64.923                    |
| <b>7</b> | Gas      | 0.962        | 0.962   |         |         | -33.318                    |

|           |          |       |       |       |       |         |
|-----------|----------|-------|-------|-------|-------|---------|
|           | Water    | 0.964 | 0.963 |       |       | -34.109 |
|           | Methanol | 0.964 | 0.963 |       |       | -34.203 |
|           | Acetone  | 0.964 | 0.963 |       |       | -34.270 |
| <b>8</b>  | Gas      | 0.962 | 0.962 |       |       | -64.922 |
|           | Water    | 0.964 | 0.964 |       |       | -64.490 |
|           | Methanol | 0.964 | 0.964 |       |       | -64.669 |
|           | Acetone  | 0.964 | 0.964 |       |       | -64.769 |
| <b>9</b>  | Gas      | 0.962 |       |       |       | 22.810  |
|           | Water    | 0.964 |       |       |       | 26.707  |
|           | Methanol | 0.964 |       |       |       | 26.527  |
|           | Acetone  | 0.964 |       |       |       | 26.253  |
| <b>10</b> | Gas      | 0.962 |       |       |       | 22.831  |
|           | Water    | 0.964 |       |       |       | 26.603  |
|           | Methanol | 0.964 |       |       |       | 26.334  |
|           | Acetone  | 0.964 |       |       |       | 25.893  |
| <b>11</b> | Gas      |       | 0.962 |       |       | -63.758 |
|           | Water    |       | 0.964 |       |       | -64.015 |
|           | Methanol |       | 0.964 |       |       | -64.115 |
|           | Acetone  |       | 0.964 |       |       | -64.065 |
| <b>12</b> | Gas      | 0.962 |       |       |       | -22.214 |
|           | Water    | 0.964 |       |       |       | -25.627 |
|           | Methanol | 0.964 |       |       |       | -25.611 |
|           | Acetone  | 0.964 |       |       |       | -25.635 |
| <b>13</b> | Gas      |       | 0.962 |       |       | -33.412 |
|           | Water    |       | 0.964 |       |       | -34.049 |
|           | Methanol |       | 0.964 |       |       | -34.078 |
|           | Acetone  |       | 0.964 |       |       | -34.049 |
| <b>14</b> | Gas      |       |       | 0.968 | 0.966 | 23.540  |



|           |          |  |       |       |       |        |
|-----------|----------|--|-------|-------|-------|--------|
|           | Water    |  |       | 0.969 | 0.967 | 24.723 |
|           | Methanol |  |       | 0.969 | 0.967 | 24.592 |
|           | Acetone  |  |       | 0.969 | 0.967 | 24.521 |
| <b>15</b> | Gas      |  | 0.962 |       | 0.962 | 64.499 |
|           | Water    |  | 0.964 |       | 0.964 | 67.615 |
|           | Methanol |  | 0.964 |       | 0.964 | 67.505 |
|           | Acetone  |  | 0.964 |       | 0.964 | 67.435 |
| <b>16</b> | Gas      |  |       |       | 0.963 | 0.005  |
|           | Water    |  |       |       | 0.965 | 0.004  |
|           | Methanol |  |       |       | 0.965 | 0.010  |
|           | Acetone  |  |       |       | 0.965 | 0.008  |

Table S2. The relative energies depended on torsional angles  $\theta_2$  (C3-C2-C1'-C2') in the gaseous medium at B3LYP/6-31G(d,p) of theory

| Degree | Compound 1<br>(au) | $\Delta E$<br>(kcal/mol) | Compound 2<br>(au) | $\Delta E$<br>(kcal/mol) | Compound 3<br>(au) | $\Delta E$<br>(kcal/mol) | Compound 4<br>(au) | $\Delta E$<br>(kcal/mol) |
|--------|--------------------|--------------------------|--------------------|--------------------------|--------------------|--------------------------|--------------------|--------------------------|
| -180   | -765.372125        | <b>0.52</b>              | -879.924052        | <b>0.63</b>              | -804.699862        | <b>0.58</b>              | -919.244155        | <b>2.25</b>              |
| -170   | -765.372077        | 0.55                     | -879.924011        | 0.66                     | -804.699812        | 0.61                     | -919.244616        | 1.96                     |
| -160   | -765.371847        | 0.70                     | -879.923804        | 0.79                     | -804.699580        | 0.75                     | -919.245372        | 1.48                     |
| -150   | -765.371286        | 1.05                     | -879.923275        | 1.12                     | -804.699020        | 1.10                     | -919.245903        | 1.15                     |
| -140   | -765.370364        | 1.63                     | -879.922367        | 1.69                     | -804.698101        | 1.68                     | -919.246046        | <b>1.06</b>              |
| -130   | -765.369074        | 2.44                     | -879.921097        | 2.49                     | -804.696819        | 2.49                     | -919.245798        | 1.22                     |
| -120   | -765.367490        | 3.43                     | -879.919550        | 3.46                     | -804.695242        | 3.47                     | -919.245220        | 1.58                     |
| -110   | -765.365895        | 4.43                     | -879.917977        | 4.44                     | -804.693661        | 4.47                     | -919.244388        | 2.10                     |
| -100   | -765.364597        | 5.25                     | -879.916745        | 5.22                     | -804.692385        | 5.27                     | -919.243508        | 2.65                     |
| -90    | -765.364177        | <b>5.51</b>              | -879.916381        | <b>5.45</b>              | -804.691967        | <b>5.53</b>              | -919.243049        | <b>2.94</b>              |
| -80    | -765.364748        | 5.15                     | -879.916957        | 5.08                     | -804.692520        | 5.18                     | -919.243135        | 2.89                     |
| -70    | -765.366106        | 4.30                     | -879.918350        | 4.21                     | -804.693864        | 4.34                     | -919.243977        | 2.36                     |
| -60    | -765.367771        | 3.26                     | -879.920025        | 3.16                     | -804.695520        | 3.30                     | -919.245167        | 1.61                     |

|     |             |             |             |             |             |             |             |             |
|-----|-------------|-------------|-------------|-------------|-------------|-------------|-------------|-------------|
| -50 | -765.369450 | 2.20        | -879.921660 | 2.13        | -804.697200 | 2.25        | -919.246321 | 0.89        |
| -40 | -765.370867 | 1.31        | -879.923045 | 1.26        | -804.698622 | 1.35        | -919.247198 | 0.34        |
| -30 | -765.371918 | 0.65        | -879.924062 | 0.63        | -804.699688 | 0.68        | -919.247694 | 0.03        |
| -20 | -765.372581 | 0.24        | -879.924666 | 0.25        | -804.700369 | 0.26        | -919.247735 | <b>0.00</b> |
| -10 | -765.372885 | 0.05        | -879.924966 | 0.06        | -804.700693 | 0.05        | -919.247544 | 0.12        |
| 0   | -765.372961 | <b>0.00</b> | -879.925059 | <b>0.00</b> | -804.700779 | <b>0.00</b> | -919.247420 | <b>0.20</b> |
| 10  | -765.372885 | 0.05        | -879.924966 | 0.06        | -804.700693 | 0.05        | -919.247544 | 0.12        |
| 20  | -765.372581 | 0.24        | -879.924666 | 0.25        | -804.700369 | 0.26        | -919.247735 | <b>0.00</b> |
| 30  | -765.371918 | 0.65        | -879.924062 | 0.63        | -804.699688 | 0.68        | -919.247694 | 0.03        |
| 40  | -765.370866 | 1.31        | -879.923045 | 1.26        | -804.698622 | 1.35        | -919.247198 | 0.34        |
| 50  | -765.369450 | 2.20        | -879.921660 | 2.13        | -804.697200 | 2.25        | -919.246321 | 0.89        |
| 60  | -765.367771 | 3.26        | -879.920025 | 3.16        | -804.695520 | 3.30        | -919.245167 | 1.61        |
| 70  | -765.366106 | 4.30        | -879.918350 | 4.21        | -804.693864 | 4.34        | -919.243977 | 2.36        |
| 80  | -765.364748 | 5.15        | -879.916957 | 5.08        | -804.692520 | 5.18        | -919.243135 | 2.89        |
| 90  | -765.364177 | <b>5.51</b> | -879.916381 | <b>5.45</b> | -804.691967 | <b>5.53</b> | -919.243049 | <b>2.94</b> |
| 100 | -765.364596 | 5.25        | -879.916746 | 5.22        | -804.692385 | 5.27        | -919.243508 | 2.65        |
| 110 | -765.365894 | 4.43        | -879.917977 | 4.44        | -804.693661 | 4.47        | -919.244388 | 2.10        |
| 120 | -765.367490 | 3.43        | -879.919550 | 3.46        | -804.695242 | 3.47        | -919.245220 | 1.58        |
| 130 | -765.369074 | 2.44        | -879.921097 | 2.49        | -804.696819 | 2.49        | -919.245798 | 1.22        |

| 140    | -765.370364        | 1.63                     | -879.922367        | 1.69                     | -804.698101        | 1.68                     | -919.246046        | <b>1.06</b>              |
|--------|--------------------|--------------------------|--------------------|--------------------------|--------------------|--------------------------|--------------------|--------------------------|
| 150    | -765.371286        | 1.05                     | -879.923275        | 1.12                     | -804.699020        | 1.10                     | -919.245903        | 1.15                     |
| 160    | -765.371847        | 0.70                     | -879.923804        | 0.79                     | -804.699580        | 0.75                     | -919.245372        | 1.48                     |
| 170    | -765.372077        | 0.55                     | -879.924011        | 0.66                     | -804.699812        | 0.61                     | -919.244617        | 1.96                     |
| 180    | -765.372125        | <b>0.52</b>              | -879.924052        | <b>0.63</b>              | -804.699862        | <b>0.58</b>              | -919.244155        | <b>2.25</b>              |
| Degree | Compound<br>5 (au) | $\Delta E$<br>(kcal/mol) | Compound 6<br>(au) | $\Delta E$<br>(kcal/mol) | Compound 7<br>(au) | $\Delta E$<br>(kcal/mol) | Compound 8<br>(au) | $\Delta E$<br>(kcal/mol) |
| -180   | -958.571491        | <b>2.31</b>              | -997.882821        | <b>5.66</b>              | -997.897863        | <b>2.09</b>              | -1037.210252       | <b>5.66</b>              |
| -170   | -958.571979        | 2.00                     | -997.883945        | 4.95                     | -997.898866        | 1.47                     | -1037.211379       | 4.95                     |
| -160   | -958.572755        | 1.52                     | -997.887424        | 2.77                     | -997.899883        | 0.83                     | -1037.214851       | 2.77                     |
| -150   | -958.573291        | 1.18                     | -997.889040        | 1.76                     | -997.900562        | 0.40                     | -1037.216459       | 1.76                     |
| -140   | -958.573437        | <b>1.09</b>              | -997.890173        | 1.04                     | -997.900789        | <b>0.26</b>              | -1037.217602       | 1.04                     |
| -130   | -958.573201        | 1.24                     | -997.890762        | 0.67                     | -997.900583        | 0.39                     | -1037.218198       | 0.67                     |
| -120   | -958.572627        | 1.60                     | -997.890931        | <b>0.57</b>              | -997.899992        | 0.76                     | -1037.218361       | <b>0.57</b>              |
| -110   | -958.571803        | 2.12                     | -997.890802        | 0.65                     | -997.899133        | 1.30                     | -1037.218232       | 0.65                     |
| -100   | -958.570945        | 2.65                     | -997.890768        | <b>0.67</b>              | -997.898233        | 1.86                     | -1037.218189       | <b>0.67</b>              |
| -90    | -958.570496        | <b>2.94</b>              | -997.890983        | 0.54                     | -997.897709        | 2.19                     | -1037.218403       | 0.54                     |
| -80    | -958.570583        | 2.88                     | -997.891370        | 0.29                     | -997.897701        | <b>2.20</b>              | -1037.218791       | 0.30                     |
| -70    | -958.571423        | 2.35                     | -997.891707        | 0.08                     | -997.898407        | 1.75                     | -1037.219133       | 0.08                     |

|     |             |             |             |             |             |             |              |             |
|-----|-------------|-------------|-------------|-------------|-------------|-------------|--------------|-------------|
| -60 | -958.572603 | 1.61        | -997.891837 | <b>0.00</b> | -997.899432 | 1.11        | -1037.219265 | <b>0.00</b> |
| -50 | -958.573752 | 0.89        | -997.891565 | 0.17        | -997.900395 | 0.51        | -1037.218997 | 0.17        |
| -40 | -958.574626 | 0.34        | -997.890771 | 0.67        | -997.901009 | 0.12        | -1037.218204 | 0.67        |
| -30 | -958.575125 | 0.03        | -997.889408 | 1.52        | -997.901202 | <b>0.00</b> | -1037.216841 | 1.52        |
| -20 | -958.575174 | <b>0.00</b> | -997.887393 | 2.79        | -997.900923 | 0.17        | -1037.214825 | 2.79        |
| -10 | -958.574983 | 0.12        | -997.884827 | 4.40        | -997.900278 | 0.58        | -1037.212256 | 4.40        |
| 0   | -958.574855 | <b>0.20</b> | -997.882166 | <b>6.07</b> | -997.899511 | <b>1.06</b> | -1037.209580 | <b>6.08</b> |
| 10  | -958.574983 | 0.12        | -997.883615 | 5.16        | -997.900279 | 0.58        | -1037.211046 | 5.16        |
| 20  | -958.575174 | <b>0.00</b> | -997.886041 | 3.64        | -997.900923 | 0.17        | -1037.213466 | 3.64        |
| 30  | -958.575124 | 0.03        | -997.888104 | 2.34        | -997.901202 | <b>0.00</b> | -1037.215527 | 2.35        |
| 40  | -958.574627 | 0.34        | -997.889575 | 1.42        | -997.901009 | 0.12        | -1037.216996 | 1.42        |
| 50  | -958.573752 | 0.89        | -997.890433 | 0.88        | -997.900395 | 0.51        | -1037.217856 | 0.88        |
| 60  | -958.572603 | 1.61        | -997.890835 | 0.63        | -997.899432 | 1.11        | -1037.218253 | 0.63        |
| 70  | -958.571423 | 2.35        | -997.890930 | 0.57        | -997.898407 | 1.75        | -1037.218348 | 0.58        |
| 80  | -958.570583 | 2.88        | -997.890890 | 0.59        | -997.897696 | <b>2.20</b> | -1037.218322 | 0.59        |
| 90  | -958.570496 | <b>2.94</b> | -997.890896 | 0.59        | -997.897709 | 2.19        | -1037.218311 | 0.60        |
| 100 | -958.570945 | 2.65        | -997.891124 | 0.45        | -997.898233 | 1.86        | -1037.218526 | 0.46        |
| 110 | -958.571803 | 2.12        | -997.891441 | 0.25        | -997.899133 | 1.30        | -1037.218865 | 0.25        |
| 120 | -958.572627 | 1.60        | -997.891627 | <b>0.13</b> | -997.899992 | 0.76        | -1037.219054 | <b>0.13</b> |



| 130    | -958.573201        | 1.24                     | -997.891547         | 0.18                     | -997.900586         | 0.39                     | -1037.218964        | 0.19                     |
|--------|--------------------|--------------------------|---------------------|--------------------------|---------------------|--------------------------|---------------------|--------------------------|
| 140    | -958.573437        | <b>1.09</b>              | -997.891034         | 0.50                     | -997.900792         | <b>0.26</b>              | -1037.218443        | 0.52                     |
| 150    | -958.573291        | 1.18                     | -997.889987         | 1.16                     | -997.900567         | 0.40                     | -1037.217401        | 1.17                     |
| 160    | -958.572755        | 1.52                     | -997.888345         | 2.19                     | -997.899428         | 1.11                     | -1037.215773        | 2.19                     |
| 170    | -958.571979        | 2.00                     | -997.886183         | 3.55                     | -997.898893         | 1.45                     | -1037.213612        | 3.55                     |
| 180    | -958.571491        | <b>2.31</b>              | -997.882821         | <b>5.66</b>              | -997.897863         | <b>2.09</b>              | -1037.210252        | <b>5.66</b>              |
| Degree | Compound<br>9 (au) | $\Delta E$<br>(kcal/mol) | Compound 10<br>(au) | $\Delta E$<br>(kcal/mol) | Compound 11<br>(au) | $\Delta E$<br>(kcal/mol) | Compound 12<br>(au) | $\Delta E$<br>(kcal/mol) |
| -180   | -1037.204413       | <b>2.18</b>              | -997.876969         | <b>2.19</b>              | -922.641814         | <b>5.04</b>              | -1033.792483        | <b>2.45</b>              |
| -170   | -1037.205045       | 1.79                     | -997.877605         | 1.79                     | -922.643366         | 4.07                     | -1033.792945        | 2.16                     |
| -160   | -1037.205807       | 1.31                     | -997.878375         | 1.31                     | -922.645367         | 2.81                     | -1033.793673        | 1.71                     |
| -150   | -1037.206339       | 0.97                     | -997.878905         | 0.97                     | -922.647013         | 1.78                     | -1033.794206        | 1.37                     |
| -140   | -1037.206454       | <b>0.90</b>              | -997.879015         | <b>0.90</b>              | -922.648121         | 1.09                     | -1033.794347        | <b>1.28</b>              |
| -130   | -1037.206177       | 1.08                     | -997.878733         | 1.08                     | -922.648702         | 0.72                     | -1033.794110        | 1.43                     |
| -120   | -1037.205522       | 1.49                     | -997.878090         | 1.48                     | -922.648871         | <b>0.62</b>              | -1033.793509        | 1.81                     |
| -110   | -1037.204614       | 2.06                     | -997.877194         | 2.05                     | -922.648725         | <b>0.71</b>              | -1033.792675        | 2.33                     |
| -100   | -1037.203607       | 2.69                     | -997.876203         | 2.67                     | -922.648750         | 0.69                     | -1033.791781        | 2.89                     |
| -90    | -1037.202775       | 3.21                     | -997.875377         | 3.19                     | -922.648931         | 0.58                     | -1033.791260        | <b>3.22</b>              |
| -80    | -1037.202551       | <b>3.35</b>              | -997.875149         | <b>3.33</b>              | -922.649329         | 0.33                     | -1033.791474        | 3.09                     |

|     |              |             |             |             |             |             |              |             |
|-----|--------------|-------------|-------------|-------------|-------------|-------------|--------------|-------------|
| -70 | -1037.203242 | 2.92        | -997.875830 | 2.90        | -922.649686 | 0.10        | -1033.792334 | 2.55        |
| -60 | -1037.204400 | 2.19        | -997.876978 | 2.18        | -922.649851 | <b>0.00</b> | -1033.793551 | 1.78        |
| -50 | -1037.205593 | 1.44        | -997.878164 | 1.44        | -922.649628 | 0.14        | -1033.794751 | 1.03        |
| -40 | -1037.206544 | 0.85        | -997.879109 | 0.84        | -922.648874 | 0.61        | -1033.795690 | 0.44        |
| -30 | -1037.207112 | 0.49        | -997.879676 | 0.49        | -922.647506 | 1.47        | -1033.796231 | 0.10        |
| -20 | -1037.207357 | 0.34        | -997.879924 | 0.33        | -922.645522 | 2.72        | -1033.796392 | <b>0.00</b> |
| -10 | -1037.207418 | 0.30        | -997.879987 | 0.29        | -922.642978 | 4.31        | -1033.796308 | 0.05        |
| 0   | -1037.207559 | 0.21        | -997.880126 | 0.21        | -922.640317 | <b>5.98</b> | -1033.796264 | <b>0.08</b> |
| 10  | -1037.207773 | 0.07        | -997.880332 | 0.08        | -922.641740 | 5.09        | -1033.796308 | 0.05        |
| 20  | -1037.207892 | <b>0.00</b> | -997.880456 | <b>0.00</b> | -922.644227 | 3.53        | -1033.796392 | <b>0.00</b> |
| 30  | -1037.207733 | 0.10        | -997.880298 | 0.10        | -922.646286 | 2.24        | -1033.796231 | 0.10        |
| 40  | -1037.207149 | 0.47        | -997.879722 | 0.46        | -922.647741 | 1.32        | -1033.795690 | 0.44        |
| 50  | -1037.206160 | 1.09        | -997.878740 | 1.08        | -922.648614 | 0.78        | -1033.794751 | 1.03        |
| 60  | -1037.204866 | 1.90        | -997.877449 | 1.89        | -922.648991 | 0.54        | -1033.793551 | 1.78        |
| 70  | -1037.203609 | 2.69        | -997.876206 | 2.67        | -922.649015 | 0.52        | -1033.792334 | 2.55        |
| 80  | -1037.202700 | 3.26        | -997.875316 | 3.23        | -922.648879 | 0.61        | -1033.791474 | 3.09        |
| 90  | -1037.202594 | <b>3.32</b> | -997.875191 | <b>3.30</b> | -922.648895 | 0.60        | -1033.791260 | <b>3.22</b> |
| 100 | -1037.203122 | 2.99        | -997.875724 | 2.97        | -922.649076 | 0.49        | -1033.791781 | 2.89        |
| 110 | -1037.203836 | 2.55        | -997.876442 | 2.52        | -922.649397 | 0.28        | -1033.792675 | 2.33        |

|        |                            |                          |                            |                          |                            |                          |                            |                          |
|--------|----------------------------|--------------------------|----------------------------|--------------------------|----------------------------|--------------------------|----------------------------|--------------------------|
| 120    | -1037.204626               | 2.05                     | -997.877221                | 2.03                     | -922.649620                | <b>0.14</b>              | -1033.793509               | 1.81                     |
| 130    | -1037.205231               | 1.67                     | -997.877814                | 1.66                     | -922.649532                | 0.20                     | -1033.794110               | 1.43                     |
| 140    | -1037.205516               | <b>1.49</b>              | -997.878089                | <b>1.49</b>              | -922.649012                | 0.53                     | -1033.794347               | <b>1.28</b>              |
| 150    | -1037.205403               | 1.56                     | -997.877973                | 1.56                     | -922.647936                | 1.20                     | -1033.794206               | 1.37                     |
| 160    | -1037.204973               | 1.83                     | -997.877531                | 1.84                     | -922.646265                | 2.25                     | -1033.793673               | 1.71                     |
| 170    | -1037.204449               | 2.16                     | -997.877003                | 2.17                     | -922.644125                | 3.59                     | -1033.792945               | 2.16                     |
| 180    | -1037.204413               | <b>2.18</b>              | -997.876969                | <b>2.19</b>              | -922.641814                | <b>5.04</b>              | -1033.792483               | <b>2.45</b>              |
| Degree | Compound<br><b>13</b> (au) | $\Delta E$<br>(kcal/mol) | Compound<br><b>14</b> (au) | $\Delta E$<br>(kcal/mol) | Compound<br><b>15</b> (au) | $\Delta E$<br>(kcal/mol) | Compound<br><b>16</b> (au) | $\Delta E$<br>(kcal/mol) |
| -180   | -844.000636                | <b>2.05</b>              | -919.245285                | <b>1.26</b>              | -883.333994                | <b>6.47</b>              | -958.557874                | <b>0.69</b>              |
| -170   | -844.001612                | 1.43                     | -919.245814                | 0.93                     | -883.336674                | 4.78                     | -958.557822                | 0.72                     |
| -160   | -844.002577                | 0.83                     | -919.246436                | 0.54                     | -883.339305                | 3.13                     | -958.557602                | 0.86                     |
| -150   | -844.003235                | 0.42                     | -919.246825                | 0.30                     | -883.341412                | 1.81                     | -958.557093                | 1.18                     |
| -140   | -844.003403                | <b>0.31</b>              | -919.246814                | <b>0.30</b>              | -883.342900                | 0.88                     | -958.556206                | 1.73                     |
| -130   | -844.003144                | 0.47                     | -919.246428                | 0.55                     | -883.343765                | 0.33                     | -958.554927                | 2.54                     |
| -120   | -844.002504                | 0.88                     | -919.245682                | 1.01                     | -883.344079                | <b>0.14</b>              | -958.553374                | 3.51                     |
| -110   | -844.001687                | 1.39                     | -919.244696                | 1.63                     | -883.344005                | 0.18                     | -958.551798                | 4.50                     |
| -100   | -844.000789                | 1.95                     | -919.243608                | 2.32                     | -883.343733                | 0.35                     | -958.550558                | 5.28                     |
| -90    | -844.000251                | <b>2.29</b>              | -919.242685                | 2.90                     | -883.343628                | <b>0.42</b>              | -958.550202                | <b>5.50</b>              |

|     |             |             |             |             |             |             |             |             |
|-----|-------------|-------------|-------------|-------------|-------------|-------------|-------------|-------------|
| -80 | -844.000288 | 2.27        | -919.242272 | <b>3.15</b> | -883.343814 | 0.30        | -958.550799 | 5.13        |
| -70 | -844.000988 | 1.83        | -919.242499 | 3.01        | -883.344125 | 0.11        | -958.552206 | 4.24        |
| -60 | -844.002053 | 1.16        | -919.243481 | 2.40        | -883.344297 | <b>0.00</b> | -958.553885 | 3.19        |
| -50 | -844.003034 | 0.54        | -919.244652 | 1.66        | -883.344134 | 0.10        | -958.555541 | 2.15        |
| -40 | -844.003709 | 0.12        | -919.245591 | 1.07        | -883.343471 | 0.52        | -958.556938 | 1.27        |
| -30 | -844.003898 | <b>0.00</b> | -919.246163 | 0.71        | -883.342216 | 1.31        | -958.557950 | 0.64        |
| -20 | -844.003623 | 0.17        | -919.246446 | 0.54        | -883.340371 | 2.46        | -958.558565 | 0.25        |
| -10 | -844.002969 | 0.58        | -919.246596 | 0.44        | -883.338059 | 3.91        | -958.558875 | 0.06        |
| 0   | -844.002227 | <b>1.05</b> | -919.246782 | 0.32        | -883.335807 | <b>5.33</b> | -958.558968 | <b>0.00</b> |
| 10  | -844.002969 | 0.58        | -919.247107 | 0.12        | -883.338059 | 3.91        | -958.558875 | 0.06        |
| 20  | -844.003623 | 0.17        | -919.247299 | <b>0.00</b> | -883.340371 | 2.46        | -958.558565 | 0.25        |
| 30  | -844.003898 | <b>0.00</b> | -919.247156 | 0.09        | -883.342216 | 1.31        | -958.557950 | 0.64        |
| 40  | -844.003709 | 0.12        | -919.246608 | 0.43        | -883.343471 | 0.52        | -958.556938 | 1.27        |
| 50  | -844.003034 | 0.54        | -919.245662 | 1.03        | -883.344134 | 0.10        | -958.555541 | 2.15        |
| 60  | -844.002053 | 1.16        | -919.244457 | 1.78        | -883.344297 | <b>0.00</b> | -958.553885 | 3.19        |
| 70  | -844.000988 | 1.83        | -919.243296 | 2.51        | -883.344125 | 0.11        | -958.552206 | 4.24        |
| 80  | -844.000288 | 2.27        | -919.242562 | 2.97        | -883.343814 | 0.30        | -958.550798 | 5.13        |
| 90  | -844.000251 | <b>2.29</b> | -919.242559 | <b>2.97</b> | -883.343628 | <b>0.42</b> | -958.550202 | <b>5.50</b> |
| 100 | -844.000789 | 1.95        | -919.243088 | 2.64        | -883.343733 | 0.35        | -958.550558 | 5.28        |

|     |             |             |             |             |             |             |             |             |
|-----|-------------|-------------|-------------|-------------|-------------|-------------|-------------|-------------|
| 110 | -844.001687 | 1.39        | -919.243942 | 2.11        | -883.344005 | 0.18        | -958.551798 | 4.50        |
| 120 | -844.002504 | 0.88        | -919.244772 | 1.59        | -883.344079 | <b>0.14</b> | -958.553374 | 3.51        |
| 130 | -844.003144 | 0.47        | -919.245407 | 1.19        | -883.343765 | 0.33        | -958.554927 | 2.54        |
| 140 | -844.003403 | <b>0.31</b> | -919.245754 | 0.97        | -883.342900 | 0.88        | -958.556206 | 1.73        |
| 150 | -844.003235 | 0.42        | -919.245791 | <b>0.95</b> | -883.341412 | 1.81        | -958.557093 | 1.18        |
| 160 | -844.002577 | 0.83        | -919.245514 | 1.12        | -883.339305 | 3.13        | -958.557602 | 0.86        |
| 170 | -844.001612 | 1.43        | -919.245211 | <b>1.31</b> | -883.336674 | 4.78        | -958.557822 | 0.72        |
| 180 | -844.000636 | <b>2.05</b> | -919.245285 | 1.26        | -883.333994 | <b>6.47</b> | -958.557874 | <b>0.69</b> |



Table S3. Condensed Fukui index  $\Delta f_k = f_k^+ - f_k^-$  of studied compounds **1-16** in gas medium at B3LYP/6-311++G(d,p) level of theory

| Position                            | 1      | 2      | 3      | 4      | 5      | 6      | 7      | 8      | 9      | 10     | 11     | 12     | 13     | 14     | 15     | 16     |
|-------------------------------------|--------|--------|--------|--------|--------|--------|--------|--------|--------|--------|--------|--------|--------|--------|--------|--------|
| C-2                                 | -0.042 | 0.059  | -0.44  | 0.819  | 0.792  | 0.304  | 0.416  | 0.315  | 0.846  | 0.658  | 0.384  | 0.495  | 0.413  | 0.367  | 0.251  | 0.300  |
| C-3                                 | 0.167  | 0.035  | 0.147  | -0.181 | -0.122 | 0.015  | -0.236 | -0.079 | 0.238  | 0.294  | -0.054 | 0.286  | 0.734  | -0.003 | 0.041  | -0.397 |
| C-3a                                | -0.236 | -0.058 | 0.056  | -1.309 | -1.191 | -0.325 | -1.199 | -0.196 | -0.158 | -0.45  | -0.468 | -0.120 | -0.593 | -0.352 | -0.134 | -0.242 |
| C-4                                 | -0.011 | 0.020  | 0.129  | -0.932 | -0.760 | -0.088 | -0.333 | 0.179  | 0.051  | -0.018 | -0.06  | -0.047 | -0.042 | -0.196 | -0.016 | 0.125  |
| C-5                                 | 0.033  | 0.041  | 0.053  | -0.333 | -0.250 | 0.043  | -0.242 | 1.775  | -0.067 | -0.001 | -0.006 | 0.075  | 0.003  | -0.155 | 0.008  | -0.348 |
| C-6                                 | -0.02  | -0.037 | -0.037 | 0.090  | 0.031  | -0.004 | -0.184 | -0.302 | -0.230 | -0.106 | -0.007 | -0.136 | -0.067 | 0.05   | 0.015  | 0.750  |
| C-7                                 | -0.036 | -0.019 | -0.033 | 0.215  | 0.199  | 0.035  | 0.483  | 0.221  | 0.121  | 0.029  | -0.059 | -0.056 | -0.116 | -0.132 | -0.169 | 0.051  |
| C-7a                                | 0.111  | -0.167 | -0.052 | 2.028  | 1.656  | -0.273 | 1.707  | -0.793 | -0.344 | -0.082 | -0.05  | -0.299 | 0.082  | 0.619  | -0.127 | -0.202 |
| C-1'                                | 0.012  | 0.008  | -0.061 | 0.376  | 0.052  | -0.162 | 0.081  | -0.161 | 0.177  | 0.091  | -0.201 | 0.253  | 0.430  | -0.204 | -0.078 | 0.213  |
| C-2'                                | -0.096 | 0.070  | -0.227 | -0.013 | -0.342 | 0.162  | -0.436 | 0.104  | -0.783 | -0.635 | 0.033  | -0.469 | -0.418 | -0.602 | 0.011  | -0.166 |
| C-3'                                | -0.035 | -0.032 | 0.278  | -0.324 | -0.290 | 0.275  | 0.431  | 0.327  | 1.309  | 1.139  | 0.248  | 0.139  | -0.050 | 0.537  | -0.261 | 0.095  |
| C-4'                                | 0.359  | -0.015 | 1.014  | -0.128 | 0.339  | 0.037  | 0.186  | 0.129  | -0.299 | -0.326 | 0.041  | 0.090  | 0.043  | -0.08  | 0.702  | -0.124 |
| C-5'                                | 0.057  | 0.119  | -1.019 | 1.294  | 0.350  | 0.078  | -0.111 | -0.103 | -0.318 | -0.209 | 0.085  | 0.206  | -0.069 | 0.398  | 0.361  | 0.468  |
| C-6'                                | 0.057  | -0.075 | 0.066  | -0.383 | -0.378 | 0.626  | -0.295 | 0.608  | -0.412 | -0.457 | 0.738  | -0.526 | -0.114 | -0.205 | 0.006  | -0.404 |
| 2-O                                 | 0.000  | -0.008 | -0.003 | -0.017 | -0.018 | -0.122 | -0.044 | -0.119 | -0.003 | -0.003 | -0.109 | -0.007 | -0.014 | -0.019 | -0.065 | 0.100  |
| 4-OH<br>or<br>(4-OCH <sub>3</sub> ) |        | 0.036  |        | 0.022  | 0.016  | 0.044  | 0.018  | 0.055  | 0.017  | 0.012  |        | 0.011  |        |        |        | -0.002 |

|                                       |        |        |       |        |        |       |        |       |        |        |       |        |        |        |        |        |
|---------------------------------------|--------|--------|-------|--------|--------|-------|--------|-------|--------|--------|-------|--------|--------|--------|--------|--------|
| 3'-OH<br>or<br>(3'-OCH <sub>3</sub> ) | -0.002 | -0.005 | 0.012 | -0.012 | -0.007 | 0.033 | 0.016  | 0.030 | -0.046 | -0.040 | 0.046 | -0.006 | -0.006 | -0.012 | -0.005 | 0.057  |
| 4'-OH                                 |        |        |       |        |        |       |        |       |        |        |       | 0.040  |        | 0.043  |        |        |
| 5'-OH<br>or<br>(5'-OCH <sub>3</sub> ) | 0.013  | 0.014  | 0.027 | 0.006  | 0.001  | 0.021 | -0.014 | 0.025 | 0.003  | 0.004  | 0.018 | -0.009 | 0.010  | 0.029  | 0.029  | -0.003 |

Table S4. Condensed Fukui index  $f_k^o$  of studied compounds **1-16** in gas medium at B3LYP/6-311++G(d,p) level of theory

| Position                            | 1      | 2      | 3      | 4      | 5      | 6      | 7      | 8      | 9      | 10     | 11     | 12     | 13     | 14     | 15     | 16     |
|-------------------------------------|--------|--------|--------|--------|--------|--------|--------|--------|--------|--------|--------|--------|--------|--------|--------|--------|
| C-2                                 | 0.028  | -0.098 | -0.168 | 0.130  | 0.104  | -0.028 | 0.077  | -0.068 | -0.048 | -0.009 | -0.018 | 0.157  | 0.063  | 0.051  | -0.018 | -0.236 |
| C-3                                 | 0.100  | -0.060 | -0.078 | -0.025 | -0.040 | -0.039 | -0.015 | -0.068 | -0.046 | -0.047 | -0.079 | -0.001 | -0.098 | -0.086 | -0.074 | -0.160 |
| C-3a                                | -0.020 | 0.119  | 0.068  | 0.027  | 0.025  | 0.030  | 0.059  | 0.006  | 0.047  | 0.050  | -0.001 | 0.017  | 0.044  | -0.002 | -0.011 | -0.027 |
| C-4                                 | 0.065  | -0.086 | -0.012 | -0.089 | -0.091 | -0.135 | -0.105 | -0.177 | -0.105 | -0.072 | -0.122 | -0.107 | -0.153 | -0.100 | -0.110 | -0.189 |
| C-5                                 | 0.021  | -0.017 | -0.014 | -0.020 | -0.007 | 0.037  | 0.056  | 0.107  | 0.086  | 0.025  | -0.008 | 0.019  | 0.015  | -0.001 | -0.005 | 0.428  |
| C-6                                 | 0.027  | -0.030 | -0.042 | -0.046 | -0.040 | -0.029 | -0.043 | 0.031  | 0.009  | -0.033 | -0.038 | -0.037 | -0.054 | -0.036 | -0.038 | 0.047  |
| C-7                                 | 0.051  | -0.020 | -0.051 | -0.031 | -0.041 | -0.038 | -0.011 | -0.042 | -0.024 | -0.035 | -0.042 | -0.044 | -0.013 | -0.038 | -0.054 | -0.085 |
| C-7a                                | -0.028 | -0.015 | -0.013 | -0.112 | -0.096 | -0.059 | -0.153 | -0.028 | -0.053 | -0.048 | 0.009  | -0.114 | -0.010 | 0.009  | 0.010  | 0.045  |
| C-1'                                | -0.030 | -0.012 | 0.004  | 0.084  | 0.033  | -0.006 | 0.008  | 0.001  | -0.007 | -0.006 | -0.027 | 0.030  | 0.049  | -0.036 | -0.008 | -0.113 |
| C-2'                                | -0.033 | 0.000  | -0.103 | 0.080  | -0.013 | 0.070  | -0.057 | 0.064  | 0.008  | 0.009  | 0.064  | -0.204 | 0.021  | -0.011 | 0.005  | 0.052  |
| C-3'                                | 0.025  | -0.038 | 0.072  | -0.151 | -0.230 | -0.080 | -0.366 | -0.058 | 0.117  | 0.049  | -0.052 | 0.159  | -0.139 | -0.030 | -0.161 | -0.011 |
| C-4'                                | 0.080  | -0.086 | 0.627  | -0.120 | 0.148  | 0.197  | 0.166  | 0.188  | -0.030 | -0.011 | 0.179  | 0.065  | -0.059 | -0.048 | 0.203  | 0.189  |
| C-5'                                | 0.070  | -0.071 | -0.657 | 0.485  | -0.074 | -0.121 | 0.194  | -0.136 | -0.128 | -0.096 | -0.101 | -0.178 | -0.030 | -0.039 | -0.020 | -0.319 |
| C-6'                                | 0.079  | 0.001  | -0.048 | -0.038 | -0.022 | 0.030  | -0.072 | 0.046  | -0.043 | -0.088 | 0.052  | -0.168 | -0.003 | -0.022 | 0.041  | 0.025  |
| 2-O                                 | 0.052  | -0.051 | -0.049 | -0.045 | -0.045 | -0.041 | -0.046 | -0.043 | -0.044 | -0.044 | -0.037 | -0.043 | -0.045 | -0.046 | -0.040 | -0.051 |
| 4-OH<br>or<br>(4-OCH <sub>3</sub> ) |        | -0.068 |        | -0.066 | -0.064 | -0.063 | -0.061 | -0.063 | -0.064 | -0.063 |        | -0.061 |        |        |        | -0.047 |

|                                       |        |        |        |        |        |        |        |        |        |        |        |        |        |        |        |        |
|---------------------------------------|--------|--------|--------|--------|--------|--------|--------|--------|--------|--------|--------|--------|--------|--------|--------|--------|
| 3'-OH<br>or<br>(3'-OCH <sub>3</sub> ) | -0.038 | -0.035 | -0.033 | -0.034 | -0.029 | -0.045 | -0.039 | -0.043 | -0.014 | -0.013 | -0.050 | -0.007 | -0.037 | -0.004 | -0.032 | -0.016 |
| 4'-OH                                 |        |        |        |        |        |        |        |        |        |        |        | -0.082 |        | -0.083 |        |        |
| 5'-OH<br>or<br>(5'-OCH <sub>3</sub> ) | -0.048 | -0.029 | -0.035 | -0.031 | -0.025 | -0.003 | -0.019 | -0.003 | -0.023 | -0.024 | -0.004 | -0.012 | -0.035 | -0.049 | -0.042 | -0.039 |

Table S5. Theoretical and experimental <sup>1</sup>H-NMR chemical shift values with respect to TMS in acetone-*d*<sub>6</sub> and CDCl<sub>3</sub> solutions of studied compounds at B3LYP/6-311++G(d,p) level of theory

| No        | 1        |      | 2         |      | 3         |      | 4         |      | 5         |      | 6         |      | 7         |      | 8         |      |
|-----------|----------|------|-----------|------|-----------|------|-----------|------|-----------|------|-----------|------|-----------|------|-----------|------|
|           | Theo.    | Exp. | Theo.     | Exp. | Theo.     | Exp. | Theo.     | Exp. | Theo.     | Exp. | Theo.     | Exp. | Theo.     | Exp. | Theo.     | Exp. |
| 3         | 7.34     | 7.16 | 7.32      | 7.27 | 7.30      | 7.03 | 6.90      | 7.09 | 6.86      | 7.03 | 6.67      | 6.80 | 6.85      | 7.10 | 6.66      | 6.84 |
| 4         | 7.75     | 7.62 |           |      | 7.69      | 7.59 |           |      |           |      |           |      |           |      |           |      |
| 5         | 7.48     | 7.23 | 6.81      | 6.69 | 7.46      | 7.22 | 7.06      | 6.70 | 7.07      | 6.69 | 7.06      | 6.71 |           |      |           |      |
| 5-Me      |          |      |           |      |           |      |           |      |           |      |           |      | 2.36      | 2.31 | 2.33      | 2.31 |
| 6         | 7.57     | 7.30 | 7.29      | 7.12 | 7.55      | 7.27 | 7.55      | 7.15 | 7.54      | 7.13 | 7.47      | 7.12 | 7.27      | 7.05 | 7.33      | 7.04 |
| 7         | 7.73     | 7.52 | 7.23      | 7.05 | 7.77      | 7.50 | 7.20      | 7.07 | 7.19      | 7.06 | 7.26      | 7.03 | 7.08      | 6.98 | 7.19      | 6.96 |
| 2'        | 7.09     | 6.93 | 7.11      | 7.00 | 7.44      | 6.99 |           |      |           |      |           |      |           |      |           |      |
| 2'-Me     |          |      |           |      |           |      | 2.44      | 2.36 | 2.50      | 2.40 | 2.08      | 2.08 | 2.37      | 2.38 | 2.07      | 2.07 |
| 4'        | 6.45     | 6.42 | 6.55      | 6.44 |           |      | 6.49      | 6.56 |           |      |           |      |           |      |           |      |
| 4'-Me     |          |      |           |      | 2.15      | 2.14 |           |      | 2.17      | 2.17 | 2.27      | 2.25 | 2.20      | 2.17 | 2.27      | 2.24 |
| 5'-OMe    |          |      | 3.90      | 3.83 |           |      | 3.85      | 3.80 | 3.90      | 3.87 | 3.66      | 3.69 | 3.90      | 3.87 | 3.66      | 3.69 |
| 6'        | 7.12     | 6.93 | 7.06      | 6.98 | 6.83      | 6.99 | 7.06      | 6.90 | 7.10      | 6.94 |           |      | 6.99      | 6.93 |           |      |
| 6'-Me     |          |      |           |      |           |      |           |      |           |      | 2.07      | 2.06 |           |      | 2.07      | 2.05 |
| <b>No</b> | <b>9</b> |      | <b>10</b> |      | <b>11</b> |      | <b>12</b> |      | <b>13</b> |      | <b>14</b> |      | <b>15</b> |      | <b>16</b> |      |



|        | Theo. | Exp. | Theo. | Exp. | Theo. | Exp. | Theo. | Exp. | Theo. | Exp. | Theo. | Exp. | Theo. | Exp. | Theo. | Exp. |
|--------|-------|------|-------|------|-------|------|-------|------|-------|------|-------|------|-------|------|-------|------|
| 3      | 6.79  | 7.18 | 6.64  | 7.10 | 6.78  | 6.76 | 6.69  | 6.99 | 6.89  | 6.86 | 6.78  | 6.78 | 6.83  | 6.63 | 7.66  | 7.09 |
| 4      |       |      |       |      | 7.79  | 7.52 |       |      | 7.88  | 7.61 | 7.73  | 7.50 | 7.88  | 7.51 |       |      |
| 4-OMe  |       |      |       |      |       |      |       |      |       |      |       |      |       |      | 4.42  | 4.05 |
| 5      |       |      | 7.05  | 6.71 | 7.55  | 7.27 | 7.05  | 6.68 | 7.45  | 7.25 | 7.48  | 7.28 | 7.40  | 7.30 |       |      |
| 5-Me   | 2.36  | 2.30 |       |      |       |      |       |      |       |      |       |      |       |      | 2.13  | 2.33 |
| 6      | 7.28  | 7.06 | 7.43  | 7.15 | 7.53  | 7.31 | 7.47  | 7.07 | 7.48  | 7.30 | 7.45  | 7.23 | 7.41  | 7.26 | 7.25  | 7.07 |
| 7      | 7.18  | 6.99 | 7.22  | 7.07 | 7.71  | 7.67 | 7.16  | 7.04 | 7.68  | 7.62 | 7.68  | 7.58 | 7.69  | 7.61 | 7.09  | 7.14 |
| 2'     |       |      |       |      |       |      |       |      |       |      |       |      |       |      | 6.98  | 6.91 |
| 2'-Me  | 2.49  | 2.41 | 2.46  | 2.43 | 2.06  | 2.07 | 2.41  | 2.39 | 2.32  | 2.34 | 2.46  | 2.42 | 1.85  | 2.06 |       |      |
| 3'-OMe | 3.69  | 3.72 | 3.67  | 3.73 |       |      | 3.92  | 3.81 |       |      | 3.80  | 3.85 |       |      |       |      |
| 4'     |       |      |       |      |       |      |       |      | 6.80  | 6.51 |       |      |       |      | 6.38  | 6.39 |
| 4'-Me  | 2.21  | 2.17 | 2.22  | 2.17 | 2.26  | 2.25 |       |      |       |      |       |      | 2.22  | 2.24 |       |      |
| 5'     |       |      |       |      |       |      |       |      |       |      |       |      |       |      |       |      |
| 5'-OMe | 3.98  | 3.90 | 3.96  | 3.91 | 3.63  | 3.69 | 4.03  | 3.90 | 3.84  | 3.86 |       |      |       |      | 3.79  | 3.86 |
| 6'     | 7.45  | 7.18 | 7.47  | 7.19 |       |      | 7.42  | 7.17 | 7.02  | 6.91 | 7.79  | 7.23 |       |      | 6.96  | 6.97 |
| 6'-Me  |       |      |       |      | 2.04  | 2.05 |       |      |       |      |       |      | 2.04  | 2.06 |       |      |

<sup>1</sup>H-NMR experience of **1-12** were measured in acetone-*d*<sub>6</sub>, while <sup>1</sup>H-NMR experience of **13-16** were recorded in CDCl<sub>3</sub>. In

comparison between observed and calculated  $^1\text{H-NMR}$  values, the  $R^2$  coefficients were found in compounds **1**:  $R^2 = 0.9802$ , **2**:  $R^2 = 0.9986$ , **3**:  $R^2 = 0.9912$ , **4**:  $R^2 = 0.9889$ , **5**:  $R^2 = 0.9937$ , **6**:  $R^2 = 0.9964$ , **7**:  $R^2 = 0.9969$ , **8**:  $R^2 = 0.9968$ , **9**:  $R^2 = 0.9930$ , **10**:  $R^2 = 0.9886$ , **11**:  $R^2 = 0.9988$ , **12**:  $R^2 = 0.9882$ , **13**:  $R^2 = 0.9978$ , **14**:  $R^2 = 0.9938$ , **15**:  $R^2 = 0.9986$ , and **16**:  $R^2 = 0.9860$

Table S6. Theoretical and experimental  $^{13}\text{C}$ -NMR chemical shift values with respect to TMS in acetone- $d_6$  and  $\text{CDCl}_3$  solutions of studied compounds at B3LYP/6-311++G(d,p) level of theory

| No    | 1     |       | 2     |       | 3     |       | 4     |       | 5     |       | 6     |       | 7     |       | 8     |       |
|-------|-------|-------|-------|-------|-------|-------|-------|-------|-------|-------|-------|-------|-------|-------|-------|-------|
|       | Theo. | Exp.  | Theo. | Exp.  | Theo. | Exp.  | Theo. | Exp.  | Theo. | Exp.  | Theo. | Exp.  | Theo. | Exp.  | Theo. | Exp.  |
| 2     | 162.3 |       | 161.9 | 155.0 | 162.7 | 157.3 | 161.4 | 154.7 | 162.0 | 155.0 | 162.6 | 154.0 | 161.9 | 155.0 | 162.6 |       |
| 3     | 106.9 | 102.3 | 101.3 | 100.0 | 105.6 | 101.4 | 106.1 | 103.2 | 105.1 | 103.1 | 106.7 | 104.2 | 106.0 | 103.0 | 106.5 | 104.0 |
| 3a    | 135.9 |       | 121.7 | 119.4 | 136.1 | 130.2 | 121.5 | 119.6 | 121.6 | 119.4 | 121.0 | 119.0 | 121.7 | 119.6 | 120.3 |       |
| 4     | 125.7 | 121.9 | 156.4 | 157.2 | 125.3 | 121.7 | 156.3 | 156.7 | 156.2 | 156.9 | 156.4 | 156.4 | 153.1 | 156.8 | 153.8 |       |
| 5     | 128.4 | 124.0 | 111.7 | 108.8 | 128.3 | 123.8 | 112.3 | 108.3 | 112.2 | 108.6 | 112.6 | 108.6 | 123.2 | 117.6 | 123.4 |       |
| 5-Me  |       |       |       |       |       |       |       |       |       |       |       |       | 17.08 | 15.70 | 14.18 | 15.60 |
| 6     | 129.7 | 125.2 | 130.7 | 126.2 | 129.2 | 124.9 | 131.0 | 125.9 | 130.6 | 125.9 | 130.4 | 125.5 | 132.1 | 127.9 | 131.3 | 127.5 |
| 7     | 115.3 | 111.7 | 106.8 | 103.5 | 115.3 | 111.6 | 106.6 | 103.2 | 106.5 | 103.5 | 106.8 | 103.6 | 105.8 | 103.1 | 106.2 | 103.2 |
| 7a    | 161.3 |       | 162.4 | 152.1 | 161.3 | 155.5 | 162.4 | 151.8 | 162.5 | 151.9 | 162.7 | 151.8 | 160.7 | 148.7 | 161.4 |       |
| 1'    | 138.1 |       | 136.9 | 133.2 | 134.7 | 129.2 | 137.5 | 132.6 | 134.2 | 129.2 | 134.1 | 130.3 | 133.9 | 129.3 | 134.3 |       |
| 2'    | 105.2 | 104.3 | 106.5 | 105.1 | 106.4 | 104.1 | 120.5 | 115.5 | 119.8 | 122.6 | 123.6 | 123.2 | 116.6 | 116.2 | 122.5 |       |
| 2'-Me |       |       |       |       |       |       | 13.1  | 12.90 | 13.5  | 13.80 | 12.1  | 14.10 | 12.0  | 13.80 | 12.08 | 14.00 |

|           |          |       |           |       |           |       |           |       |           |       |           |       |           |       |           |       |
|-----------|----------|-------|-----------|-------|-----------|-------|-----------|-------|-----------|-------|-----------|-------|-----------|-------|-----------|-------|
| 3'        | 165.5    |       | 165.2     | 159.8 | 164.3     | 157.5 | 162.6     | 157.1 | 161.2     | 155.4 | 158.2     | 152.8 | 160.0     | 155.2 | 158.2     |       |
| 4'        | 104.8    | 104.1 | 107.7     | 102.4 | 113.7     | 113.0 | 106.5     | 102.3 | 115.6     | 114.0 | 125.1     | 120.3 | 118.3     | 114.0 | 125.0     |       |
| 4'-Me     |          |       |           |       | 6.02      | 8.70  |           |       | 5.69      | 9.10  | 9.58      | 9.90  | 8.62      | 9.10  | 9.53      | 9.80  |
| 5'        | 165.2    |       | 168.8     | 162.4 | 162.9     | 157.5 | 165.1     | 159.3 | 161.9     | 157.1 | 160.8     | 157.3 | 163.5     | 157.1 | 160.8     |       |
| 5'-OMe    |          |       | 55.9      | 55.7  |           |       | 55.91     | 55.4  | 55.9      | 56.0  | 60.9      | 60.20 | 56.0      | 55.90 | 60.9      | 60.2  |
| 6'        | 106.4    | 104.3 | 100.3     | 102.6 | 104.8     | 104.1 | 104.2     | 105.1 | 103.6     | 103.4 | 131.2     | 121.4 | 104.3     | 103.2 | 131.1     |       |
| 6'-Me     |          |       |           |       |           |       |           |       |           |       | 14.17     | 13.50 |           |       | 14.6      | 13.50 |
| <b>No</b> | <b>9</b> |       | <b>10</b> |       | <b>11</b> |       | <b>12</b> |       | <b>13</b> |       | <b>14</b> |       | <b>15</b> |       | <b>16</b> |       |
|           | Theo.    | Exp.  | Theo.     | Exp.  | Theo.     | Exp.  | Theo.     | Exp.  | Theo.     | Exp.  | Theo.     | Exp.  | Theo.     | Exp.  | Theo.     | Exp.  |
| 2         | 161.9    | 154.7 | 162.1     | 154.8 | 164.2     |       | 162.1     |       | 163.1     | 155.7 | 162.6     | 155.4 | 162.8     | 154.7 | 160.0     | 156.9 |
| 3         | 104.6    | 103.4 | 104.5     | 103.4 | 112.1     |       | 103.5     | 103.1 | 111.1     | 106.1 | 109.1     | 104.4 | 112.9     | 106.5 | 104.3     | 99.80 |
| 3a        | 121.5    | 119.4 | 121.7     | 119.4 | 134.7     |       | 121.8     |       | 135.1     | 129.5 | 135.3     | 129.2 | 134.9     | 129.0 | 119.8     | 120.3 |
| 4         | 153.8    | 155.1 | 156.6     | 156.8 | 124.4     |       | 155.9     | 157.2 | 125.3     | 121.5 | 124.5     | 120.7 | 125.1     | 120.8 | 157.3     | 150.8 |
| 4-OMe     |          |       |           |       |           |       |           |       |           |       |           |       |           |       | 58.3      | 60.20 |
| 5         | 123.2    | 117.4 | 112.2     | 108.7 | 128.4     |       | 111.8     | 108.9 | 127.2     | 123.1 | 127.4     | 122.7 | 127.0     | 122.7 | 126.6     | 122.2 |
| 5-Me      | 17.1     | 15.70 |           |       |           |       |           |       |           |       |           |       |           |       | 17.6      | 15.80 |

|        |       |       |       |       |       |  |       |       |       |       |       |       |       |       |       |       |
|--------|-------|-------|-------|-------|-------|--|-------|-------|-------|-------|-------|-------|-------|-------|-------|-------|
| 6      | 132.1 | 128.1 | 130.4 | 126.1 | 128.5 |  | 130.0 | 126.4 | 129.0 | 124.6 | 128.3 | 124.0 | 128.2 | 123.9 | 131.3 | 127.4 |
| 7      | 105.8 | 103.1 | 106.6 | 103.4 | 115.0 |  | 106.2 | 103.7 | 115.1 | 111.5 | 114.8 | 111.0 | 115.3 | 111.3 | 105.4 | 105.8 |
| 7a     | 160.9 | 148.8 | 162.5 | 152.0 | 161.1 |  | 161.9 | 155.9 | 161.0 | 155.0 | 160.8 | 154.3 | 161.4 | 154.8 | 162.7 | 154.8 |
| 1'     | 133.4 | 129.8 | 133.1 | 129.7 | 133.7 |  | 126.6 |       | 137.6 | 132.2 | 128.1 | 122.8 | 134.8 | 128.7 | 137.9 |       |
| 2'     | 127.8 | 121.8 | 128.0 | 121.9 | 121.9 |  | 130.1 | 123.5 | 116.5 | 117.8 | 126.7 | 121.2 | 118.8 | 108.6 | 103.4 | 104.5 |
| 2'-Me  | 14.23 | 13.80 | 14.32 | 13.8  | 12.05 |  | 14.5  | 13.8  | 11.4  | 13.0  | 15.28 | 13.70 | 12.4  | 13.10 |       |       |
| 3'     | 164.2 | 159.0 | 164.1 | 159.0 | 162.1 |  | 150.7 | 148.0 | 163.4 | 155.7 | 150.8 | 146.1 | 157.1 | 150.6 | 165.9 | 155.1 |
| 3'-OMe | 61.02 | 60.40 | 61.06 | 60.3  |       |  | 59.94 | 60.90 |       |       | 61.3  | 61.0  |       |       |       |       |
| 4'     | 127.7 | 120.7 | 127.8 | 120.8 | 125.9 |  | 147.0 | 142.1 | 108.0 | 99.8  | 142.4 | 136.9 | 113.4 | 115.6 | 99.5  | 101.9 |
| 4'-Me  | 9.37  | 9.50  | 9.42  | 9.50  | 9.48  |  |       |       |       |       |       |       | 5.77  | 8.80  |       |       |
| 5'     | 163.6 | 157.5 | 163.7 | 157.5 | 162.1 |  | 151.0 | 148.2 | 165.9 | 159.7 | 148.9 | 142.2 | 159.8 | 150.6 | 169.0 | 161.8 |
| 5'-OMe | 56.1  | 56.0  | 56.06 | 56.0  | 60.4  |  | 56.6  | 56.80 | 55.5  | 60.0  |       |       |       |       | 55.6  | 56.00 |
| 6'     | 107.6 | 106.4 | 107.6 | 106.6 | 131.4 |  | 107.0 | 108.7 | 104.9 | 107.2 | 114.4 | 111.5 | 122.2 | 108.6 | 108.1 | 103.0 |
| 6'-Me  |       |       |       |       | 13.9  |  |       |       |       |       |       |       | 14.19 | 13.10 |       |       |

<sup>1</sup>H-NMR experience of **1-10**, and **12** were measured in acetone-*d*<sub>6</sub>, while <sup>1</sup>H-NMR experience of **13-16** were recorded in CDCl<sub>3</sub>. In comparison between observed and calculated <sup>13</sup>C-NMR values, the *R*<sup>2</sup> coefficients were found in compounds **2**: *R*<sup>2</sup> = 0.9929, **3**: *R*<sup>2</sup> = 0.9991, **4**: *R*<sup>2</sup> = 0.9964, **5**: *R*<sup>2</sup> = 0.9966, **6**: *R*<sup>2</sup> = 0.9971, **7**: *R*<sup>2</sup> = 0.9964, **9**: *R*<sup>2</sup> = 0.9972, **10**: *R*<sup>2</sup> = 0.9976, **13**: *R*<sup>2</sup> = 0.9953, **14**: *R*<sup>2</sup> = 0.9993,

and **15**:  $R^2 = 0.9957$ .

Table S7. Optimized geometries (in Cartesian coordinates) of studied compounds **1-16** at B3LYP/6-311++G(d,p) level of theory in gas medium

| Compound | Cartesian Coordinate |                 |                 |                 |
|----------|----------------------|-----------------|-----------------|-----------------|
| <b>1</b> | C                    | 2.516189000000  | -0.826945000000 | -0.000073000000 |
|          | C                    | 2.386767000000  | 0.572636000000  | 0.000112000000  |
|          | C                    | 3.464208000000  | 1.444971000000  | 0.000243000000  |
|          | C                    | 4.731406000000  | 0.865987000000  | 0.000183000000  |
|          | C                    | 4.896094000000  | -0.530415000000 | 0.000000000000  |
|          | C                    | 3.802058000000  | -1.387156000000 | -0.000129000000 |
|          | C                    | 1.172213000000  | -1.334750000000 | -0.000163000000 |
|          | H                    | 3.322906000000  | 2.518547000000  | 0.000383000000  |
|          | H                    | 5.606783000000  | 1.504942000000  | 0.000281000000  |
|          | H                    | 0.869715000000  | -2.369422000000 | -0.000310000000 |
|          | C                    | 0.338951000000  | -0.254411000000 | -0.000028000000 |
|          | O                    | 1.065571000000  | 0.921621000000  | 0.000139000000  |
|          | C                    | -1.113456000000 | -0.121673000000 | -0.000031000000 |
|          | C                    | -1.922604000000 | -1.263514000000 | -0.000166000000 |
|          | C                    | -1.702542000000 | 1.152534000000  | 0.000108000000  |
|          | C                    | -3.307770000000 | -1.124123000000 | -0.000175000000 |
|          | C                    | -3.089810000000 | 1.267618000000  | 0.000100000000  |
|          | C                    | -3.904350000000 | 0.135927000000  | -0.000050000000 |
|          | H                    | -1.076430000000 | 2.036245000000  | 0.000221000000  |
|          | H                    | -1.501083000000 | -2.259668000000 | -0.000261000000 |
| H        | -4.982054000000      | 0.256393000000  | -0.000069000000 |                 |



|   |   |                 |                 |                 |
|---|---|-----------------|-----------------|-----------------|
|   | H | 5.898377000000  | -0.943179000000 | -0.000042000000 |
|   | H | 3.939986000000  | -2.462310000000 | -0.000271000000 |
|   | O | -4.046671000000 | -2.275403000000 | -0.000331000000 |
|   | H | -4.985435000000 | -2.061559000000 | -0.000134000000 |
|   | O | -3.722539000000 | 2.480438000000  | 0.000231000000  |
|   | H | -3.067782000000 | 3.186644000000  | 0.000294000000  |
|   | C | 2.573209000000  | -0.440933000000 | -0.000055000000 |
|   | C | 2.205481000000  | 0.914818000000  | 0.000170000000  |
|   | C | 3.108363000000  | 1.967332000000  | 0.000343000000  |
|   | C | 4.455386000000  | 1.611592000000  | 0.000284000000  |
|   | C | 4.869976000000  | 0.271676000000  | 0.000065000000  |
|   | C | 3.941030000000  | -0.762011000000 | -0.000105000000 |
|   | C | 1.339264000000  | -1.179450000000 | -0.000183000000 |
|   | H | 2.781473000000  | 2.998583000000  | 0.000513000000  |
|   | H | 5.209215000000  | 2.390112000000  | 0.000412000000  |
| 2 | H | 1.204805000000  | -2.249652000000 | -0.000365000000 |
|   | C | 0.329796000000  | -0.261053000000 | -0.000029000000 |
|   | O | 0.842919000000  | 1.020731000000  | 0.000187000000  |
|   | C | -1.123634000000 | -0.386225000000 | -0.000055000000 |
|   | C | -1.715972000000 | -1.651828000000 | -0.000247000000 |
|   | C | -1.923686000000 | 0.770551000000  | 0.000113000000  |
|   | C | -3.105480000000 | -1.757779000000 | -0.000282000000 |
|   | C | -3.311370000000 | 0.641801000000  | 0.000080000000  |
|   | C | -3.909732000000 | -0.623294000000 | -0.000126000000 |

|          |   |                 |                 |                 |
|----------|---|-----------------|-----------------|-----------------|
|          | H | -1.447537000000 | 1.738416000000  | 0.000264000000  |
|          | H | -1.126597000000 | -2.558936000000 | -0.000372000000 |
|          | H | -4.992046000000 | -0.692415000000 | -0.000160000000 |
|          | H | 5.923623000000  | 0.021212000000  | 0.000025000000  |
|          | O | -3.630133000000 | -3.022125000000 | -0.000491000000 |
|          | H | -4.591822000000 | -2.975921000000 | -0.000378000000 |
|          | O | -4.178417000000 | 1.693484000000  | 0.000228000000  |
|          | O | 4.400923000000  | -2.050584000000 | -0.000321000000 |
|          | H | 3.661024000000  | -2.665702000000 | -0.000394000000 |
|          | C | -3.649261000000 | 3.014681000000  | 0.000404000000  |
|          | H | -3.046141000000 | 3.202336000000  | 0.894671000000  |
|          | H | -3.046121000000 | 3.202564000000  | -0.893802000000 |
|          | H | -4.512429000000 | 3.678071000000  | 0.000480000000  |
| <b>3</b> | C | -2.883639000000 | -0.817773000000 | 0.000051000000  |
|          | C | -2.739704000000 | 0.580477000000  | -0.000167000000 |
|          | C | -3.807713000000 | 1.464056000000  | -0.000334000000 |
|          | C | -5.081356000000 | 0.898824000000  | -0.000274000000 |
|          | C | -5.260625000000 | -0.495579000000 | -0.000058000000 |
|          | C | -4.175458000000 | -1.363934000000 | 0.000108000000  |
|          | C | -1.544885000000 | -1.339638000000 | 0.000167000000  |
|          | H | -3.654867000000 | 2.536083000000  | -0.000498000000 |
|          | H | -5.949824000000 | 1.547155000000  | -0.000399000000 |
|          | H | -1.252842000000 | -2.377317000000 | 0.000343000000  |
|          | C | -0.700263000000 | -0.268016000000 | 0.000018000000  |

|   |   |                 |                 |                 |
|---|---|-----------------|-----------------|-----------------|
|   | O | -1.414751000000 | 0.915680000000  | -0.000186000000 |
|   | C | 0.752561000000  | -0.149901000000 | 0.000035000000  |
|   | C | 1.555878000000  | -1.294416000000 | 0.000174000000  |
|   | C | 1.359993000000  | 1.112979000000  | -0.000105000000 |
|   | C | 2.940259000000  | -1.165092000000 | 0.000206000000  |
|   | C | 2.748205000000  | 1.216499000000  | -0.000077000000 |
|   | C | 3.575881000000  | 0.086068000000  | 0.000097000000  |
|   | H | 0.746464000000  | 2.005848000000  | -0.000234000000 |
|   | H | 1.130896000000  | -2.289312000000 | 0.000259000000  |
|   | H | -6.267175000000 | -0.897919000000 | -0.000018000000 |
|   | H | -4.324965000000 | -2.437564000000 | 0.000274000000  |
|   | O | 3.661964000000  | -2.328736000000 | 0.000382000000  |
|   | H | 4.604368000000  | -2.132500000000 | 0.000056000000  |
|   | O | 3.368481000000  | 2.441114000000  | -0.000216000000 |
|   | H | 2.702197000000  | 3.135928000000  | -0.000221000000 |
|   | C | 5.079132000000  | 0.199474000000  | 0.000166000000  |
|   | H | 5.522049000000  | -0.271363000000 | 0.886650000000  |
|   | H | 5.522116000000  | -0.270926000000 | -0.886521000000 |
|   | H | 5.386436000000  | 1.243268000000  | 0.000422000000  |
| 4 | C | 2.618033000000  | -0.350330000000 | 0.133855000000  |
|   | C | 2.268991000000  | 0.939991000000  | -0.293574000000 |
|   | C | 3.185373000000  | 1.946264000000  | -0.561858000000 |
|   | C | 4.525069000000  | 1.612300000000  | -0.376623000000 |
|   | C | 4.920844000000  | 0.336690000000  | 0.052207000000  |

|   |                 |                 |                 |
|---|-----------------|-----------------|-----------------|
| C | 3.978727000000  | -0.652127000000 | 0.309512000000  |
| C | 1.375949000000  | -1.060645000000 | 0.283984000000  |
| H | 2.873385000000  | 2.927518000000  | -0.893783000000 |
| H | 5.288446000000  | 2.357097000000  | -0.568992000000 |
| H | 1.232453000000  | -2.069527000000 | 0.630876000000  |
| C | 0.375355000000  | -0.192375000000 | -0.050311000000 |
| O | 0.911693000000  | 1.035721000000  | -0.402658000000 |
| C | -1.086960000000 | -0.265081000000 | -0.047987000000 |
| C | -1.778280000000 | -1.486251000000 | -0.170010000000 |
| C | -1.783376000000 | 0.953465000000  | 0.094112000000  |
| C | -3.183208000000 | -1.432171000000 | -0.104296000000 |
| C | -3.170941000000 | 0.962036000000  | 0.140847000000  |
| C | -3.876467000000 | -0.240183000000 | 0.049144000000  |
| H | -1.215398000000 | 1.866926000000  | 0.174257000000  |
| H | -4.960029000000 | -0.219972000000 | 0.097779000000  |
| H | 5.969318000000  | 0.101510000000  | 0.187515000000  |
| O | -3.854557000000 | -2.625733000000 | -0.205311000000 |
| H | -4.802933000000 | -2.461036000000 | -0.205909000000 |
| O | -3.935599000000 | 2.083253000000  | 0.282368000000  |
| O | 4.418949000000  | -1.879781000000 | 0.724064000000  |
| H | 3.671511000000  | -2.472134000000 | 0.851648000000  |
| C | -3.280499000000 | 3.341802000000  | 0.384137000000  |
| H | -2.631181000000 | 3.383231000000  | 1.264973000000  |
| H | -2.691973000000 | 3.558783000000  | -0.513411000000 |

|   |   |                 |                 |                 |
|---|---|-----------------|-----------------|-----------------|
|   | H | -4.073521000000 | 4.080988000000  | 0.484436000000  |
|   | C | -1.113218000000 | -2.820582000000 | -0.398278000000 |
|   | H | -1.810595000000 | -3.514364000000 | -0.865715000000 |
|   | H | -0.237779000000 | -2.721232000000 | -1.042267000000 |
|   | H | -0.787939000000 | -3.282284000000 | 0.541728000000  |
|   | C | 2.912367000000  | -0.368389000000 | 0.133706000000  |
|   | C | 2.576959000000  | 0.927308000000  | -0.288079000000 |
|   | C | 3.503598000000  | 1.926428000000  | -0.547607000000 |
|   | C | 4.839712000000  | 1.579291000000  | -0.359805000000 |
|   | C | 5.221944000000  | 0.297776000000  | 0.063539000000  |
|   | C | 4.269485000000  | -0.683447000000 | 0.312079000000  |
|   | C | 1.663039000000  | -1.067749000000 | 0.276906000000  |
|   | H | 3.201840000000  | 2.912294000000  | -0.875397000000 |
|   | H | 5.610577000000  | 2.318024000000  | -0.545625000000 |
| 5 | H | 1.508875000000  | -2.076625000000 | 0.619288000000  |
|   | C | 0.671470000000  | -0.188550000000 | -0.056372000000 |
|   | O | 1.220862000000  | 1.036226000000  | -0.401387000000 |
|   | C | -0.790642000000 | -0.246870000000 | -0.059508000000 |
|   | C | -1.500064000000 | -1.455669000000 | -0.182089000000 |
|   | C | -1.480282000000 | 0.972733000000  | 0.079463000000  |
|   | C | -2.902605000000 | -1.383468000000 | -0.117274000000 |
|   | C | -2.867289000000 | 0.999574000000  | 0.123663000000  |
|   | C | -3.611805000000 | -0.188935000000 | 0.034063000000  |
|   | H | -0.906022000000 | 1.882021000000  | 0.160710000000  |

|   |   |                 |                 |                 |
|---|---|-----------------|-----------------|-----------------|
|   | H | 6.267687000000  | 0.051959000000  | 0.201180000000  |
|   | O | 4.696654000000  | -1.917833000000 | 0.721579000000  |
|   | H | 3.942708000000  | -2.503295000000 | 0.842479000000  |
|   | O | -3.577395000000 | -2.576527000000 | -0.216126000000 |
|   | H | -4.525661000000 | -2.413154000000 | -0.229758000000 |
|   | O | -3.595584000000 | 2.150444000000  | 0.263475000000  |
|   | C | -0.851792000000 | -2.798694000000 | -0.408638000000 |
|   | H | -1.553864000000 | -3.482297000000 | -0.883709000000 |
|   | H | 0.030419000000  | -2.708546000000 | -1.044608000000 |
|   | H | -0.540293000000 | -3.266798000000 | 0.532976000000  |
|   | C | -5.118667000000 | -0.186218000000 | 0.096436000000  |
|   | H | -5.565855000000 | -0.586873000000 | -0.822531000000 |
|   | H | -5.490712000000 | -0.782251000000 | 0.938876000000  |
|   | H | -5.494662000000 | 0.826649000000  | 0.222050000000  |
|   | C | -2.903168000000 | 3.388282000000  | 0.362173000000  |
|   | H | -2.252048000000 | 3.412630000000  | 1.242268000000  |
|   | H | -2.309068000000 | 3.586112000000  | -0.536045000000 |
|   | H | -3.673770000000 | 4.151258000000  | 0.461571000000  |
| 6 | C | -2.994521000000 | 0.260879000000  | 0.330152000000  |
|   | C | -2.688967000000 | -0.650895000000 | -0.693150000000 |
|   | C | -3.639397000000 | -1.371716000000 | -1.402511000000 |
|   | C | -4.965718000000 | -1.148622000000 | -1.041183000000 |
|   | C | -5.317230000000 | -0.251534000000 | -0.021707000000 |
|   | C | -4.342315000000 | 0.456591000000  | 0.671057000000  |

|   |                 |                 |                 |
|---|-----------------|-----------------|-----------------|
| C | -1.725048000000 | 0.778121000000  | 0.779567000000  |
| H | -3.360530000000 | -2.062670000000 | -2.186866000000 |
| H | -5.753487000000 | -1.682835000000 | -1.559382000000 |
| H | -1.527923000000 | 1.492754000000  | 1.564189000000  |
| C | -0.765040000000 | 0.173726000000  | 0.030370000000  |
| O | -1.334779000000 | -0.703951000000 | -0.875342000000 |
| C | 0.706990000000  | 0.263597000000  | 0.031254000000  |
| C | 1.341589000000  | 1.473347000000  | -0.314914000000 |
| C | 1.452299000000  | -0.875396000000 | 0.393779000000  |
| C | 2.740145000000  | 1.521939000000  | -0.257687000000 |
| C | 2.850280000000  | -0.774717000000 | 0.398636000000  |
| C | 3.519053000000  | 0.417044000000  | 0.098736000000  |
| H | -6.356120000000 | -0.097285000000 | 0.242700000000  |
| O | -4.740415000000 | 1.321766000000  | 1.655008000000  |
| H | -3.970878000000 | 1.718243000000  | 2.075021000000  |
| O | 3.433028000000  | 2.670206000000  | -0.560894000000 |
| H | 2.817579000000  | 3.381244000000  | -0.763930000000 |
| O | 3.601485000000  | -1.871484000000 | 0.786802000000  |
| C | 3.955419000000  | -2.759379000000 | -0.275097000000 |
| H | 3.065813000000  | -3.175607000000 | -0.759715000000 |
| H | 4.567545000000  | -2.250662000000 | -1.028133000000 |
| H | 4.532757000000  | -3.566745000000 | 0.175768000000  |
| C | 0.589373000000  | 2.703474000000  | -0.769156000000 |
| H | 0.987008000000  | 3.083849000000  | -1.718233000000 |



|   |   |                 |                 |                 |
|---|---|-----------------|-----------------|-----------------|
|   | H | -0.465778000000 | 2.492021000000  | -0.929408000000 |
|   | H | 0.646829000000  | 3.517350000000  | -0.034989000000 |
|   | C | 5.018399000000  | 0.540148000000  | 0.161721000000  |
|   | H | 5.448812000000  | 0.653918000000  | -0.838736000000 |
|   | H | 5.305562000000  | 1.430441000000  | 0.726025000000  |
|   | H | 5.457357000000  | -0.335720000000 | 0.636400000000  |
|   | C | 0.783042000000  | -2.163406000000 | 0.812197000000  |
|   | H | 0.506051000000  | -2.776927000000 | -0.050924000000 |
|   | H | 1.450093000000  | -2.748563000000 | 1.444911000000  |
|   | H | -0.135360000000 | -1.964315000000 | 1.368320000000  |
|   | C | 2.559156000000  | -0.335847000000 | 0.131884000000  |
|   | C | 2.225482000000  | 0.911245000000  | -0.415718000000 |
|   | C | 3.160964000000  | 1.872219000000  | -0.761751000000 |
|   | C | 4.493367000000  | 1.537511000000  | -0.528707000000 |
|   | C | 4.892454000000  | 0.305778000000  | 0.022230000000  |
|   | C | 3.912138000000  | -0.632888000000 | 0.352515000000  |
|   | C | 1.306921000000  | -1.018116000000 | 0.333353000000  |
| 7 | H | 2.872361000000  | 2.824355000000  | -1.186957000000 |
|   | H | 5.265099000000  | 2.256368000000  | -0.781702000000 |
|   | H | 1.145028000000  | -1.985008000000 | 0.781376000000  |
|   | C | 0.319593000000  | -0.175422000000 | -0.092286000000 |
|   | O | 0.868126000000  | 1.009666000000  | -0.549666000000 |
|   | C | -1.143390000000 | -0.237488000000 | -0.085850000000 |
|   | C | -1.855413000000 | -1.442142000000 | -0.234545000000 |

|   |                 |                 |                 |
|---|-----------------|-----------------|-----------------|
| C | -1.833243000000 | 0.973502000000  | 0.096898000000  |
| C | -3.259425000000 | -1.383831000000 | -0.130347000000 |
| C | -3.220735000000 | 0.988300000000  | 0.166286000000  |
| C | -3.967056000000 | -0.197857000000 | 0.073656000000  |
| H | -1.260767000000 | 1.883034000000  | 0.193020000000  |
| O | 4.324094000000  | -1.828104000000 | 0.886902000000  |
| H | 3.561044000000  | -2.383431000000 | 1.073518000000  |
| O | -4.020563000000 | -2.522920000000 | -0.243407000000 |
| H | -3.449359000000 | -3.294619000000 | -0.295662000000 |
| O | -3.957322000000 | 2.126526000000  | 0.340593000000  |
| C | -3.277282000000 | 3.369180000000  | 0.458516000000  |
| H | -2.614817000000 | 3.381599000000  | 1.330588000000  |
| H | -2.697067000000 | 3.594115000000  | -0.442565000000 |
| H | -4.054713000000 | 4.121116000000  | 0.584837000000  |
| C | 6.347134000000  | -0.015191000000 | 0.258902000000  |
| H | 6.542705000000  | -0.223212000000 | 1.315057000000  |
| H | 6.655230000000  | -0.904758000000 | -0.298584000000 |
| H | 6.981536000000  | 0.817938000000  | -0.048958000000 |
| C | -1.197573000000 | -2.765323000000 | -0.550852000000 |
| H | -1.780882000000 | -3.335632000000 | -1.283119000000 |
| H | -0.213548000000 | -2.619860000000 | -0.993962000000 |
| H | -1.067763000000 | -3.400742000000 | 0.334939000000  |
| C | -5.468251000000 | -0.175375000000 | 0.179577000000  |
| H | -5.858031000000 | -1.170171000000 | 0.388010000000  |

|   |                |                 |                 |                 |
|---|----------------|-----------------|-----------------|-----------------|
|   | H              | -5.787483000000 | 0.511358000000  | 0.965643000000  |
|   | H              | -5.922286000000 | 0.176678000000  | -0.753421000000 |
| 8 | C              | -2.662048000000 | 0.256681000000  | 0.277398000000  |
|   | C              | -2.343589000000 | -0.656025000000 | -0.739338000000 |
|   | C              | -3.292616000000 | -1.373136000000 | -1.450179000000 |
|   | C              | -4.620594000000 | -1.143353000000 | -1.097865000000 |
|   | C              | -5.003857000000 | -0.244911000000 | -0.084977000000 |
|   | C              | -4.010985000000 | 0.455189000000  | 0.604633000000  |
|   | C              | -1.397378000000 | 0.775406000000  | 0.740168000000  |
|   | H              | -3.016068000000 | -2.068679000000 | -2.231468000000 |
|   | H              | -5.401930000000 | -1.680426000000 | -1.624661000000 |
|   | H              | -1.208283000000 | 1.491539000000  | 1.525544000000  |
|   | C              | -0.428484000000 | 0.169590000000  | 0.002935000000  |
|   | O              | -0.986077000000 | -0.710031000000 | -0.907190000000 |
|   | C              | 1.043457000000  | 0.261334000000  | 0.021140000000  |
|   | C              | 1.680777000000  | 1.471962000000  | -0.316982000000 |
|   | C              | 1.786258000000  | -0.876874000000 | 0.391443000000  |
|   | C              | 3.078511000000  | 1.522374000000  | -0.243443000000 |
|   | C              | 3.183926000000  | -0.774403000000 | 0.412450000000  |
|   | C              | 3.854731000000  | 0.418422000000  | 0.121406000000  |
|   | O              | -4.407763000000 | 1.327222000000  | 1.587590000000  |
|   | H              | -3.636325000000 | 1.722721000000  | 2.004846000000  |
| O | 3.773192000000 | 2.671979000000  | -0.538131000000 |                 |
| H | 3.158759000000 | 3.382126000000  | -0.747238000000 |                 |

|          |   |                 |                 |                 |
|----------|---|-----------------|-----------------|-----------------|
|          | O | 3.932206000000  | -1.870685000000 | 0.808115000000  |
|          | C | 4.299522000000  | -2.756569000000 | -0.250809000000 |
|          | H | 3.416107000000  | -3.173690000000 | -0.745890000000 |
|          | H | 4.919150000000  | -2.245845000000 | -0.996342000000 |
|          | H | 4.873211000000  | -3.563557000000 | 0.205407000000  |
|          | C | -6.454766000000 | -0.027315000000 | 0.265407000000  |
|          | H | -6.650423000000 | -0.261423000000 | 1.315958000000  |
|          | H | -6.749272000000 | 1.015867000000  | 0.116029000000  |
|          | H | -7.099446000000 | -0.655975000000 | -0.351445000000 |
|          | C | 0.932590000000  | 2.701242000000  | -0.780104000000 |
|          | H | 1.340107000000  | 3.081191000000  | -1.725173000000 |
|          | H | -0.120604000000 | 2.488580000000  | -0.951149000000 |
|          | H | 0.981539000000  | 3.515742000000  | -0.045962000000 |
|          | C | 5.353077000000  | 0.543439000000  | 0.202645000000  |
|          | H | 5.796151000000  | 0.654074000000  | -0.792662000000 |
|          | H | 5.632211000000  | 1.435942000000  | 0.767447000000  |
|          | H | 5.786889000000  | -0.330422000000 | 0.685754000000  |
|          | C | 1.113950000000  | -2.165982000000 | 0.801511000000  |
|          | H | 0.187830000000  | -1.968154000000 | 1.345082000000  |
|          | H | 0.849394000000  | -2.780205000000 | -0.064990000000 |
|          | H | 1.773659000000  | -2.749719000000 | 1.443219000000  |
| <b>9</b> | C | -2.757519000000 | -0.379375000000 | 0.063778000000  |
|          | C | -2.497697000000 | 0.966611000000  | -0.229111000000 |
|          | C | -3.487482000000 | 1.921671000000  | -0.391498000000 |

|   |                 |                 |                 |
|---|-----------------|-----------------|-----------------|
| C | -4.798105000000 | 1.472181000000  | -0.242239000000 |
| C | -5.124412000000 | 0.135843000000  | 0.053487000000  |
| C | -4.090956000000 | -0.791694000000 | 0.204955000000  |
| C | -1.469024000000 | -1.015879000000 | 0.143797000000  |
| H | -3.255410000000 | 2.953213000000  | -0.621197000000 |
| H | -5.610708000000 | 2.180961000000  | -0.359271000000 |
| H | -1.258548000000 | -2.043318000000 | 0.385384000000  |
| C | -0.528971000000 | -0.052445000000 | -0.098545000000 |
| O | -1.149322000000 | 1.165494000000  | -0.326163000000 |
| C | 0.933747000000  | -0.021878000000 | -0.111682000000 |
| C | 1.723324000000  | -1.173293000000 | -0.301375000000 |
| C | 1.550968000000  | 1.229536000000  | 0.077022000000  |
| C | 3.122569000000  | -1.015882000000 | -0.258674000000 |
| C | 2.932705000000  | 1.345375000000  | 0.086654000000  |
| C | 3.754893000000  | 0.216943000000  | -0.083479000000 |
| H | 0.922761000000  | 2.095733000000  | 0.215050000000  |
| O | -4.432481000000 | -2.089468000000 | 0.491541000000  |
| H | -3.639899000000 | -2.632114000000 | 0.545788000000  |
| O | 3.918630000000  | -2.131764000000 | -0.466684000000 |
| O | 3.595890000000  | 2.528954000000  | 0.260871000000  |
| C | 4.259758000000  | -2.850033000000 | 0.719568000000  |
| H | 4.821234000000  | -2.218875000000 | 1.417062000000  |
| H | 3.365887000000  | -3.231716000000 | 1.225409000000  |
| H | 4.883266000000  | -3.687826000000 | 0.406692000000  |

|           |   |                 |                 |                 |
|-----------|---|-----------------|-----------------|-----------------|
|           | C | 2.835841000000  | 3.720671000000  | 0.412853000000  |
|           | H | 2.211723000000  | 3.911476000000  | -0.466526000000 |
|           | H | 2.203222000000  | 3.680450000000  | 1.306027000000  |
|           | H | 3.562957000000  | 4.523922000000  | 0.521761000000  |
|           | C | -6.557819000000 | -0.308219000000 | 0.206220000000  |
|           | H | -6.811514000000 | -1.091368000000 | -0.514388000000 |
|           | H | -6.742632000000 | -0.724759000000 | 1.200903000000  |
|           | H | -7.240159000000 | 0.530113000000  | 0.054644000000  |
|           | C | 1.147674000000  | -2.535243000000 | -0.601846000000 |
|           | H | 0.797811000000  | -3.047214000000 | 0.302699000000  |
|           | H | 0.298095000000  | -2.460055000000 | -1.283680000000 |
|           | H | 1.904958000000  | -3.166979000000 | -1.063925000000 |
|           | C | 5.252491000000  | 0.366759000000  | -0.093836000000 |
|           | H | 5.632588000000  | 0.627584000000  | 0.899650000000  |
|           | H | 5.731029000000  | -0.553814000000 | -0.423462000000 |
|           | H | 5.549698000000  | 1.178954000000  | -0.761422000000 |
| <b>10</b> | C | -3.090622000000 | -0.455468000000 | 0.100402000000  |
|           | C | -2.857638000000 | 0.895664000000  | -0.197287000000 |
|           | C | -3.858811000000 | 1.842317000000  | -0.357113000000 |
|           | C | -5.163324000000 | 1.378873000000  | -0.200068000000 |
|           | C | -5.444187000000 | 0.037664000000  | 0.099428000000  |
|           | C | -4.418485000000 | -0.887987000000 | 0.250438000000  |
|           | C | -1.791176000000 | -1.068940000000 | 0.173492000000  |
|           | H | -3.635035000000 | 2.874750000000  | -0.590399000000 |

|   |                 |                 |                 |
|---|-----------------|-----------------|-----------------|
| H | -5.989202000000 | 2.071444000000  | -0.312819000000 |
| H | -1.562216000000 | -2.092180000000 | 0.415693000000  |
| C | -0.870158000000 | -0.090033000000 | -0.077608000000 |
| O | -1.514746000000 | 1.116436000000  | -0.303456000000 |
| C | 0.591467000000  | -0.032874000000 | -0.102369000000 |
| C | 1.399431000000  | -1.170556000000 | -0.296912000000 |
| C | 1.187732000000  | 1.229623000000  | 0.079747000000  |
| C | 2.796018000000  | -0.988417000000 | -0.265679000000 |
| C | 2.567244000000  | 1.369804000000  | 0.078248000000  |
| C | 3.407760000000  | 0.255653000000  | -0.096993000000 |
| H | 0.545639000000  | 2.084903000000  | 0.221921000000  |
| O | -4.748075000000 | -2.184392000000 | 0.541877000000  |
| H | -3.952246000000 | -2.722902000000 | 0.590814000000  |
| O | 3.609995000000  | -2.089937000000 | -0.479414000000 |
| O | 3.210866000000  | 2.564990000000  | 0.245164000000  |
| C | 3.973073000000  | -2.802408000000 | 0.703974000000  |
| H | 4.527134000000  | -2.161058000000 | 1.398033000000  |
| H | 3.090292000000  | -3.201707000000 | 1.215636000000  |
| H | 4.610387000000  | -3.627733000000 | 0.385936000000  |
| C | 2.431687000000  | 3.744051000000  | 0.399582000000  |
| H | 1.797949000000  | 3.921574000000  | -0.475679000000 |
| H | 1.806657000000  | 3.695713000000  | 1.297661000000  |
| H | 3.145837000000  | 4.559821000000  | 0.500729000000  |
| C | 0.845481000000  | -2.542759000000 | -0.591219000000 |

|           |   |                 |                 |                 |
|-----------|---|-----------------|-----------------|-----------------|
|           | H | 0.511819000000  | -3.059643000000 | 0.316625000000  |
|           | H | -0.010377000000 | -2.483647000000 | -1.266761000000 |
|           | H | 1.610151000000  | -3.161685000000 | -1.058438000000 |
|           | C | 4.902276000000  | 0.431793000000  | -0.119469000000 |
|           | H | 5.285965000000  | 0.696339000000  | 0.871654000000  |
|           | H | 5.394086000000  | -0.479316000000 | -0.455774000000 |
|           | H | 5.179436000000  | 1.251030000000  | -0.787000000000 |
|           | H | -6.467192000000 | -0.298492000000 | 0.215224000000  |
|           | C | 3.204516000000  | 0.455362000000  | -0.591398000000 |
|           | C | 2.979821000000  | -0.412325000000 | 0.490923000000  |
|           | C | 3.995312000000  | -1.052369000000 | 1.186215000000  |
|           | C | 5.296707000000  | -0.800031000000 | 0.758506000000  |
|           | C | 5.555022000000  | 0.060075000000  | -0.323017000000 |
|           | C | 4.522487000000  | 0.693001000000  | -1.005551000000 |
|           | C | 1.895257000000  | 0.890954000000  | -1.006253000000 |
|           | H | 3.781050000000  | -1.712854000000 | 2.017189000000  |
|           | H | 6.125321000000  | -1.276878000000 | 1.269094000000  |
|           | H | 1.649688000000  | 1.553302000000  | -1.821627000000 |
|           | C | 0.995381000000  | 0.287587000000  | -0.184921000000 |
|           | O | 1.640190000000  | -0.516704000000 | 0.741803000000  |
|           | C | -0.477816000000 | 0.311352000000  | -0.123380000000 |
|           | C | -1.154817000000 | 1.514644000000  | 0.159681000000  |
|           | C | -1.183357000000 | -0.883973000000 | -0.364971000000 |
|           | C | -2.555215000000 | 1.495812000000  | 0.165425000000  |
| <b>11</b> |   |                 |                 |                 |



|  |   |                 |                 |                 |
|--|---|-----------------|-----------------|-----------------|
|  | C | -2.583300000000 | -0.846777000000 | -0.310123000000 |
|  | C | -3.295181000000 | 0.333080000000  | -0.068246000000 |
|  | H | 6.581082000000  | 0.231024000000  | -0.628089000000 |
|  | H | 4.733275000000  | 1.354456000000  | -1.838221000000 |
|  | O | -3.288942000000 | 2.632107000000  | 0.413781000000  |
|  | H | -2.700332000000 | 3.384904000000  | 0.525118000000  |
|  | O | -3.297102000000 | -2.003266000000 | -0.578527000000 |
|  | C | -3.560424000000 | -2.820142000000 | 0.563359000000  |
|  | H | -2.631219000000 | -3.157668000000 | 1.034831000000  |
|  | H | -4.161612000000 | -2.281493000000 | 1.304357000000  |
|  | H | -4.118319000000 | -3.684937000000 | 0.203627000000  |
|  | C | -0.444588000000 | 2.809391000000  | 0.483050000000  |
|  | H | -0.820590000000 | 3.245473000000  | 1.416883000000  |
|  | H | 0.625395000000  | 2.658741000000  | 0.609989000000  |
|  | H | -0.571215000000 | 3.558733000000  | -0.308847000000 |
|  | C | -4.799992000000 | 0.384140000000  | -0.066846000000 |
|  | H | -5.188483000000 | 0.575342000000  | 0.938891000000  |
|  | H | -5.155581000000 | 1.202572000000  | -0.697394000000 |
|  | H | -5.217983000000 | -0.551405000000 | -0.434484000000 |
|  | C | -0.473514000000 | -2.168745000000 | -0.722551000000 |
|  | H | -0.126895000000 | -2.703880000000 | 0.167095000000  |
|  | H | -1.141356000000 | -2.827988000000 | -1.276735000000 |
|  | H | 0.406815000000  | -1.970757000000 | -1.337546000000 |
|  | C | -3.123028000000 | -0.449894000000 | -0.123543000000 |

|    |                |                 |                 |                 |
|----|----------------|-----------------|-----------------|-----------------|
| 12 | C              | -2.860743000000 | 0.857611000000  | 0.311251000000  |
|    | C              | -3.841645000000 | 1.787045000000  | 0.623504000000  |
|    | C              | -5.157961000000 | 1.353058000000  | 0.478757000000  |
|    | C              | -5.468162000000 | 0.055946000000  | 0.045194000000  |
|    | C              | -4.461393000000 | -0.853510000000 | -0.257860000000 |
|    | C              | -1.835984000000 | -1.060662000000 | -0.327511000000 |
|    | H              | -3.594950000000 | 2.785545000000  | 0.959147000000  |
|    | H              | -5.969208000000 | 2.034247000000  | 0.707447000000  |
|    | H              | -1.633237000000 | -2.051525000000 | -0.694298000000 |
|    | C              | -0.891500000000 | -0.122447000000 | -0.013709000000 |
|    | O              | -1.511212000000 | 1.055832000000  | 0.377222000000  |
|    | C              | 0.569068000000  | -0.072491000000 | -0.048565000000 |
|    | C              | 1.380247000000  | -1.227675000000 | -0.031880000000 |
|    | C              | 1.163748000000  | 1.205370000000  | -0.099667000000 |
|    | C              | 2.777671000000  | -1.067866000000 | -0.095849000000 |
|    | C              | 2.537086000000  | 1.336365000000  | -0.165417000000 |
|    | C              | 3.357700000000  | 0.199588000000  | -0.179603000000 |
|    | H              | 0.526640000000  | 2.076496000000  | -0.098968000000 |
|    | H              | -6.499296000000 | -0.258526000000 | -0.058956000000 |
|    | O              | 3.571237000000  | -2.187816000000 | -0.148661000000 |
| O  | 3.232789000000 | 2.518435000000  | -0.243515000000 |                 |
| C  | 2.497903000000 | 3.738152000000  | -0.268950000000 |                 |
| H  | 1.834154000000 | 3.778662000000  | -1.138163000000 |                 |
| H  | 1.912370000000 | 3.862732000000  | 0.647135000000  |                 |

|           |   |                 |                 |                 |
|-----------|---|-----------------|-----------------|-----------------|
|           | H | 3.238756000000  | 4.532655000000  | -0.338438000000 |
|           | C | 4.480667000000  | -2.381245000000 | 0.944236000000  |
|           | H | 5.221986000000  | -1.582301000000 | 0.989954000000  |
|           | H | 3.933681000000  | -2.437046000000 | 1.891929000000  |
|           | H | 4.976241000000  | -3.332859000000 | 0.754387000000  |
|           | C | 0.823203000000  | -2.625494000000 | 0.064054000000  |
|           | H | 1.604321000000  | -3.326153000000 | 0.351475000000  |
|           | H | 0.011435000000  | -2.678358000000 | 0.792743000000  |
|           | H | 0.429791000000  | -2.967369000000 | -0.900119000000 |
|           | O | -4.819784000000 | -2.106874000000 | -0.676190000000 |
|           | H | -4.033233000000 | -2.637504000000 | -0.836098000000 |
|           | O | 4.709167000000  | 0.331886000000  | -0.285697000000 |
|           | H | 4.901714000000  | 1.278486000000  | -0.341087000000 |
| <b>13</b> | C | 2.814218000000  | -0.665477000000 | 0.345289000000  |
|           | C | 2.590653000000  | 0.572402000000  | -0.279576000000 |
|           | C | 3.605240000000  | 1.445709000000  | -0.641525000000 |
|           | C | 4.905860000000  | 1.042674000000  | -0.347004000000 |
|           | C | 5.163501000000  | -0.187190000000 | 0.283716000000  |
|           | C | 4.131496000000  | -1.049439000000 | 0.634860000000  |
|           | C | 1.508670000000  | -1.238466000000 | 0.532835000000  |
|           | H | 3.391851000000  | 2.390164000000  | -1.126368000000 |
|           | H | 5.734457000000  | 1.690386000000  | -0.608677000000 |
|           | H | 1.277349000000  | -2.170197000000 | 1.021292000000  |
|           | C | 0.602684000000  | -0.349991000000 | 0.029403000000  |

|   |                 |                 |                 |
|---|-----------------|-----------------|-----------------|
| O | 1.252519000000  | 0.768106000000  | -0.469375000000 |
| C | -0.861357000000 | -0.302783000000 | -0.015499000000 |
| C | -1.648430000000 | -1.465863000000 | -0.131728000000 |
| C | -1.459236000000 | 0.967380000000  | 0.085465000000  |
| C | -3.047286000000 | -1.300497000000 | -0.085687000000 |
| C | -2.845490000000 | 1.086777000000  | 0.102446000000  |
| C | -3.644223000000 | -0.053827000000 | 0.027744000000  |
| H | -0.820397000000 | 1.833396000000  | 0.162950000000  |
| H | -4.722605000000 | 0.031039000000  | 0.055978000000  |
| H | 6.188933000000  | -0.465675000000 | 0.498040000000  |
| H | 4.341572000000  | -1.995725000000 | 1.120244000000  |
| O | -3.904472000000 | -2.366996000000 | -0.162884000000 |
| O | -3.514998000000 | 2.271148000000  | 0.203195000000  |
| C | -2.760318000000 | 3.473585000000  | 0.281914000000  |
| H | -2.123846000000 | 3.488664000000  | 1.173138000000  |
| H | -2.141759000000 | 3.616277000000  | -0.610446000000 |
| H | -3.491304000000 | 4.277849000000  | 0.347160000000  |
| H | -3.406376000000 | -3.189485000000 | -0.190886000000 |
| C | -1.076506000000 | -2.847073000000 | -0.348573000000 |
| H | -0.079392000000 | -2.798600000000 | -0.783917000000 |
| H | -1.000995000000 | -3.427614000000 | 0.579524000000  |
| H | -1.688729000000 | -3.426074000000 | -1.049995000000 |
| C | -3.128352000000 | -0.778876000000 | 0.185093000000  |
| C | -3.076598000000 | 0.592589000000  | -0.111834000000 |

|    |   |                 |                 |                 |
|----|---|-----------------|-----------------|-----------------|
| 14 | C | -4.200418000000 | 1.389547000000  | -0.267287000000 |
|    | C | -5.433903000000 | 0.760873000000  | -0.109769000000 |
|    | C | -5.520866000000 | -0.609651000000 | 0.191122000000  |
|    | C | -4.380564000000 | -1.390406000000 | 0.341422000000  |
|    | C | -1.757558000000 | -1.206452000000 | 0.253767000000  |
|    | H | -4.117541000000 | 2.444118000000  | -0.498718000000 |
|    | H | -6.343078000000 | 1.340168000000  | -0.221144000000 |
|    | H | -1.407862000000 | -2.194838000000 | 0.494924000000  |
|    | C | -0.979141000000 | -0.111099000000 | 0.001676000000  |
|    | O | -1.778470000000 | 0.999301000000  | -0.222579000000 |
|    | C | 0.460994000000  | 0.142301000000  | -0.031009000000 |
|    | C | 1.409330000000  | -0.885939000000 | -0.251425000000 |
|    | C | 0.888207000000  | 1.469772000000  | 0.155627000000  |
|    | C | 2.761937000000  | -0.525333000000 | -0.221598000000 |
|    | C | 2.231229000000  | 1.803580000000  | 0.134986000000  |
|    | C | 3.175898000000  | 0.794472000000  | -0.052811000000 |
|    | H | 0.162843000000  | 2.256143000000  | 0.310982000000  |
|    | H | -6.498477000000 | -1.063441000000 | 0.307267000000  |
|    | H | -4.459308000000 | -2.446461000000 | 0.573514000000  |
|    | O | 4.498159000000  | 1.146429000000  | -0.072270000000 |
|    | H | 4.997589000000  | 0.372363000000  | -0.369486000000 |
|    | O | 2.618967000000  | 3.100599000000  | 0.303933000000  |
|    | H | 3.580756000000  | 3.145437000000  | 0.228287000000  |
|    | O | 3.787024000000  | -1.436155000000 | -0.446192000000 |

|    |   |                 |                 |                 |
|----|---|-----------------|-----------------|-----------------|
|    | C | 4.112941000000  | -2.271837000000 | 0.675928000000  |
|    | H | 3.268887000000  | -2.908301000000 | 0.952645000000  |
|    | H | 4.949210000000  | -2.895201000000 | 0.360284000000  |
|    | H | 4.406476000000  | -1.666830000000 | 1.539861000000  |
|    | C | 1.040196000000  | -2.310039000000 | -0.585451000000 |
|    | H | 0.790130000000  | -2.898837000000 | 0.304464000000  |
|    | H | 0.173649000000  | -2.341412000000 | -1.248341000000 |
|    | H | 1.871293000000  | -2.805320000000 | -1.088305000000 |
|    | C | -2.968766000000 | -0.456930000000 | 0.640138000000  |
|    | C | -2.817247000000 | 0.311216000000  | -0.526766000000 |
|    | C | -3.882350000000 | 0.795287000000  | -1.272113000000 |
|    | C | -5.158365000000 | 0.485040000000  | -0.807490000000 |
|    | C | -5.344209000000 | -0.279294000000 | 0.357565000000  |
|    | C | -4.262556000000 | -0.755559000000 | 1.089628000000  |
|    | C | -1.627797000000 | -0.744028000000 | 1.082831000000  |
|    | H | -3.723611000000 | 1.381995000000  | -2.168380000000 |
|    | H | -6.023702000000 | 0.839987000000  | -1.355129000000 |
|    | H | -1.327657000000 | -1.307273000000 | 1.952447000000  |
|    | C | -0.781532000000 | -0.159142000000 | 0.195439000000  |
|    | O | -1.490658000000 | 0.496049000000  | -0.800976000000 |
|    | C | 0.689789000000  | -0.086275000000 | 0.109895000000  |
|    | C | 1.315437000000  | 1.173007000000  | 0.228691000000  |
|    | C | 1.435765000000  | -1.261092000000 | -0.089491000000 |
|    | C | 2.709485000000  | 1.229660000000  | 0.128456000000  |
| 15 |   |                 |                 |                 |

|  |   |                 |                 |                 |
|--|---|-----------------|-----------------|-----------------|
|  | C | 2.830864000000  | -1.140216000000 | -0.152686000000 |
|  | C | 3.493312000000  | 0.085366000000  | -0.055356000000 |
|  | H | -6.352505000000 | -0.500736000000 | 0.688345000000  |
|  | H | -4.417444000000 | -1.345282000000 | 1.986013000000  |
|  | O | 3.385672000000  | 2.424113000000  | 0.219676000000  |
|  | H | 2.756489000000  | 3.145165000000  | 0.317970000000  |
|  | O | 3.534378000000  | -2.306443000000 | -0.332549000000 |
|  | H | 4.474228000000  | -2.112162000000 | -0.404629000000 |
|  | C | 0.540030000000  | 2.444774000000  | 0.488267000000  |
|  | H | 0.465239000000  | 3.075553000000  | -0.405728000000 |
|  | H | -0.477137000000 | 2.233534000000  | 0.813200000000  |
|  | H | 1.002512000000  | 3.040901000000  | 1.285071000000  |
|  | C | 0.825660000000  | -2.630633000000 | -0.264151000000 |
|  | H | 0.978337000000  | -3.251073000000 | 0.625680000000  |
|  | H | -0.244599000000 | -2.572225000000 | -0.453908000000 |
|  | H | 1.302425000000  | -3.156174000000 | -1.094411000000 |
|  | C | 4.997261000000  | 0.164242000000  | -0.146660000000 |
|  | H | 5.482254000000  | -0.402894000000 | 0.657412000000  |
|  | H | 5.366318000000  | -0.226754000000 | -1.103240000000 |
|  | H | 5.335015000000  | 1.195153000000  | -0.067098000000 |
|  | C | 2.110563000000  | 0.162041000000  | -0.000461000000 |
|  | C | 1.879574000000  | -1.230428000000 | -0.000278000000 |
|  | C | 2.871859000000  | -2.192008000000 | -0.000156000000 |
|  | C | 4.180138000000  | -1.715957000000 | -0.000104000000 |

|    |                 |                 |                 |                 |
|----|-----------------|-----------------|-----------------|-----------------|
| 16 | C               | 4.489208000000  | -0.348249000000 | -0.000153000000 |
|    | C               | 3.452810000000  | 0.600064000000  | -0.000350000000 |
|    | C               | 0.790322000000  | 0.750891000000  | -0.000348000000 |
|    | H               | 2.639388000000  | -3.248683000000 | -0.000106000000 |
|    | H               | 4.999416000000  | -2.426569000000 | -0.000009000000 |
|    | H               | 0.527305000000  | 1.792960000000  | -0.000524000000 |
|    | C               | -0.110558000000 | -0.270960000000 | -0.000229000000 |
|    | O               | 0.536684000000  | -1.487336000000 | -0.000260000000 |
|    | C               | -1.568829000000 | -0.303726000000 | -0.000099000000 |
|    | C               | -2.242874000000 | -1.537154000000 | 0.000338000000  |
|    | C               | -2.301709000000 | 0.884947000000  | -0.000177000000 |
|    | C               | -3.632252000000 | -1.555217000000 | 0.000482000000  |
|    | C               | -3.698271000000 | 0.845741000000  | 0.000021000000  |
|    | C               | -4.376963000000 | -0.373385000000 | 0.000309000000  |
|    | H               | -1.817325000000 | 1.852159000000  | -0.000471000000 |
|    | H               | -1.678339000000 | -2.461573000000 | 0.000619000000  |
|    | H               | -5.455164000000 | -0.441712000000 | 0.000415000000  |
|    | O               | -4.347040000000 | -2.723318000000 | 0.000967000000  |
|    | H               | -3.741138000000 | -3.471781000000 | -0.001409000000 |
|    | O               | 3.875024000000  | 1.900424000000  | -0.000544000000 |
| O  | -4.318909000000 | 2.060379000000  | 0.000096000000  |                 |
| C  | 2.942912000000  | 2.972661000000  | 0.001656000000  |                 |
| H  | 2.315092000000  | 2.959399000000  | -0.894133000000 |                 |
| H  | 2.316102000000  | 2.956520000000  | 0.898113000000  |                 |



|   |                 |                 |                 |
|---|-----------------|-----------------|-----------------|
| H | 3.542900000000  | 3.881782000000  | 0.002716000000  |
| C | -5.740509000000 | 2.100951000000  | -0.000959000000 |
| H | -6.153184000000 | 1.622213000000  | -0.895293000000 |
| H | -6.154538000000 | 1.623031000000  | 0.893195000000  |
| H | -6.006532000000 | 3.156675000000  | -0.001616000000 |
| C | 5.923118000000  | 0.120282000000  | -0.000066000000 |
| H | 6.141657000000  | 0.736691000000  | 0.876873000000  |
| H | 6.605264000000  | -0.731857000000 | 0.000023000000  |
| H | 6.141788000000  | 0.736605000000  | -0.877038000000 |
